# Supplementary material for: Does δ 18 O of O 2 record meridional shifts in tropical rainfall?
Source: Copernicus journal article supplement (doi:10.5194/cp-2017-83), 2017-06-29
Supplement: Supplementary file 1 [file SupplementalDataset.xlsx]

## Sheet: WAIS Divide measurements
WAIS Divide d15N and d18Oatm					18Oraw: uncorrected																																				Pooled standard deviations:					count:	420	420	420
WDC06A core, all values in per mil with respect to modern air					18Ocorr: corrected for gasloss and gravity																																				15N	18Ograv	18Ocorr	O2/N2	Ar/N2	sum:	0.00162416	0.0217316	0.015207
WD06A depth (m)	WD2014 age (yrBP)	reps		--------mean values across all reps--------						----------------------------------------------------------------------------------------------------------------------------Individual replicate measurements on a single piece of ice-----------------------------------------------------------------------------------------------------------------																															0.00283743	0.00989515	0.00845021	2.45191	2.77598		squared deviations (rep a)
				15N	18Oraw	18Oglc	O2/N2	Ar/N2		date	15N	18Oraw	18Ocorr	O2/N2	Ar/N2			date	15N	18Oraw	18Ocorr	O2/N2	Ar/N2			date	15N	18Oraw	18Ocorr	O2/N2	Ar/N2			date	15N	18Oraw	18Ocorr	O2/N2	Ar/N2								15N	18Ograv	18Oglc
80.29	16.1	2		0.310461	0.644999	0.0176757	-6.79703	-1.44278		2009-09-14	0.30893	0.647146	0.0225395	-6.86328	-1.44443			2009-09-14	0.311992	0.642852	0.012812	-6.73078	-1.44113																								2.34327e-06	4.60926e-06	2.3656e-05
82.28	24.9	2		0.315248	0.667839	0.0284468	-5.96763	-0.0385413		2009-09-09	0.317182	0.662292	0.0209412	-5.27588	0.237479			2009-09-09	0.313314	0.673386	0.0359525	-6.65937	-0.314562																								3.74094e-06	3.07713e-05	5.63349e-05
84.29	33.8	2		0.313134	0.64812	0.0178729	-4.15325	0.64785		2009-09-03	0.313181	0.647623	0.0173653	-4.01032	0.770639			2009-09-04	0.313088	0.648618	0.0183806	-4.29619	0.525062																								2.17329e-09	2.47549e-07	2.57736e-07
86.28	41.6	2		0.308044	0.633633	0.0139081	-3.70919	0.9689		2009-09-07	0.306082	0.616015	0.00380915	-2.95422	0.904451			2009-09-08	0.310006	0.651252	0.024007	-4.46416	1.03335																								3.84884e-06	0.000310417	0.000101989
88.23	50.5	2		0.297837	0.603582	0.00543586	-4.61285	-0.259613		2009-09-15	0.298022	0.608663	0.00947908	-5.10153	-0.592121			2009-09-15	0.297652	0.598501	0.00139263	-4.12417	0.0728954																								3.41827e-08	2.58156e-05	1.63477e-05
90.25	59.3	2		0.309396	0.642869	0.0161871	-5.95765	-0.297411		2009-09-15	0.307534	0.636293	0.0148253	-5.70552	-0.392149			2009-09-15	0.311258	0.649445	0.017549	-6.20977	-0.202673																								3.4684e-06	4.32411e-05	1.85464e-06
92.22	68.2	2		0.307301	0.624824	0.0069396	-4.97617	-0.36279										2009-09-04	0.307157	0.623601	0.00531267	-4.96534	-0.200771			2009-09-20	0.307446	0.626047	0.00856654	-4.987	-0.524809
94.24	77.4	2		0.308779	0.618255	0.000764609	-4.42337	-0.544164		2009-09-08	0.309223	0.618434	0.00116971	-4.35499	-0.71861			2009-09-08	0.308335	0.618076	0.000359511	-4.49175	-0.369719																								1.9717e-07	3.20408e-08	1.64104e-07
96.24	86	2		0.303574	0.608781	-0.000703539	-3.99506	0.364978		2009-09-16	0.30196	0.60474	-0.000561961	-4.01531	0.121564			2009-09-16	0.305188	0.612823	-0.000845117	-3.9748	0.608393																								2.60398e-06	1.63344e-05	2.00443e-08
98.16	93.6	2		0.308974	0.624165	0.00497913	-3.83364	0.325284		2009-09-10	0.3084	0.619047	0.00201744	-3.63012	0.299228			2009-09-10	0.309549	0.629282	0.00794081	-4.03717	0.35134																								3.29828e-07	2.61886e-05	8.77157e-06
100.14	102.3	2		0.305181	0.629481	0.0153955	-4.18123	0.499934		2009-09-16	0.303516	0.629093	0.0171928	-4.62576	0.301144			2009-09-16	0.306847	0.62987	0.0135982	-3.73671	0.698724																								2.77465e-06	1.51076e-07	3.23016e-06
102.13	112.1	2		0.307401	0.619023	0.00496326	-3.49592	0.209197		2009-09-15	0.307297	0.614338	0.00120537	-3.24444	0.297654			2009-09-15	0.307506	0.623709	0.00872115	-3.7474	0.12074																								1.09315e-08	2.1956e-05	1.41218e-05
104.08	120.6	2		0.309195	0.614918	0.000368808	-2.47117	0.550088		2009-09-09	0.309254	0.609398	-0.00619456	-2.82073	0.410462			2009-09-09	0.309137	0.620438	0.00693217	-2.1216	0.689714																								3.43003e-09	3.04669e-05	4.30777e-05
106.06	129.1	2		0.307071	0.627059	0.00929727	-3.99539	0.675359		2009-09-07	0.309374	0.627817	0.0058928	-3.9604	0.63041			2009-09-08	0.304767	0.626301	0.0127017	-4.03038	0.720307																								5.30705e-06	5.74631e-07	1.15904e-05
110.01	147.2	2		0.299286	0.602308	0.00293711	-3.93529	0.0506482		2009-09-10	0.295364	0.589163	-0.00123112	-3.40424	0.29254			2009-09-10	0.303208	0.615452	0.00710534	-4.46634	-0.191243																								1.53818e-05	0.000172769	1.73741e-05
112.09	156.9	2		0.303221	0.596438	-0.00785794	-5.04452	-1.65804		2009-09-17	0.302622	0.600406	-0.00340626	-5.33504	-1.79139			2009-09-17	0.30382	0.59247	-0.0123096	-4.75401	-1.52469																								3.59215e-07	1.57462e-05	1.98175e-05
114.06	164.3	2		0.304661	0.61754	0.00621819	-3.94823	0.345615										2009-09-08	0.302879	0.615922	0.00627506	-4.78485	-0.0766305			2009-09-18	0.306442	0.619158	0.00616132	-3.11161	0.767861
115.95	173.8	2		0.305251	0.605285	-0.00620156	-4.12939	-0.0513903		2009-09-17	0.30061	0.597421	-0.00473275	-4.15744	-0.127763			2009-09-17	0.309891	0.613149	-0.00767037	-4.10133	0.0249822																								2.15363e-05	6.1845e-05	2.1574e-06
117.95	182	2		0.297242	0.591723	-0.00431641	-4.2213	-0.0809939		2009-09-03	0.294644	0.58592	-0.00660087	-5.31386	-0.807894			2009-09-03	0.299841	0.597527	-0.00203195	-3.12875	0.645907																								6.75288e-06	3.36781e-05	5.21875e-06
118.06	183.1	2		0.312695	0.627441	-0.000645829	-6.09651	-1.55093		2009-09-17	0.312154	0.61551	-0.00651925	-4.32332	-0.905191			2009-09-17	0.313236	0.639372	0.0052276	-7.8697	-2.19667																								2.9314e-07	0.000142353	3.44971e-05
118.95	187.2	2		0.294318	0.595618	0.00431865	-4.98948	-0.616785		2009-09-08	0.293369	0.598871	0.00848281	-5.38554	-0.796874			2009-09-09	0.295268	0.592366	0.000154488	-4.59341	-0.436697																								9.01763e-07	1.0579e-05	1.73402e-05
121.95	199.9	2		0.300614	0.609777	0.00462931	-4.61108	0.0832975		2009-09-16	0.301063	0.61054	0.00345191	-5.25811	-0.320367			2009-09-16	0.300165	0.609014	0.00580671	-3.96405	0.486962																								2.01326e-07	5.82187e-07	1.38627e-06
123.95	209.4	2		0.299215	0.59333	-0.00670477	-4.82302	-0.646422		2009-09-14	0.299678	0.593498	-0.0085272	-5.38787	-0.964454			2009-09-14	0.298752	0.593162	-0.00488234	-4.25818	-0.328389																								2.14594e-07	2.82255e-08	3.32126e-06
125.95	217.7	2		0.302416	0.601446	-0.00340706	-5.29216	-1.43131		2009-09-04	0.302173	0.610563	0.00655293	-5.08682	-1.30961			2009-09-04	0.302659	0.592329	-0.0133671	-5.4975	-1.55301																								5.9199e-08	8.31195e-05	9.92014e-05
127.95	226.9	2		0.308092	0.603607	-0.0109565	-4.05686	-0.530713		2009-09-07	0.307823	0.598714	-0.0160129	-4.46525	-0.780756			2009-09-07	0.30836	0.6085	-0.00590005	-3.64846	-0.280669																								7.19848e-08	2.39413e-05	2.55676e-05
129.18	232.8	2		0.294368	0.60606	0.00877335	-6.35625	-0.665443		2009-04-08	0.292234	0.603441	0.012115	-5.91326	-0.619065			2009-04-08	0.296503	0.608679	0.00543166	-6.79925	-0.711822																								4.55569e-06	6.85816e-06	1.11669e-05
131.05	240.7	2		0.305757	0.612219	-0.00266874	-5.31255	-0.686134		2009-04-08	0.304193	0.607553	-0.00495551	-5.91728	-1.12906			2009-04-09	0.307322	0.616886	-0.000381979	-4.70781	-0.243212																								2.44745e-06	2.17742e-05	5.22929e-06
133.05	249.6	2		0.29813	0.622682	0.0188668	-6.34611	-0.844247		2009-04-04	0.295565	0.614022	0.0177501	-5.69175	-0.752177			2009-04-04	0.300695	0.631342	0.0199836	-7.00046	-0.936317																								6.57965e-06	7.49992e-05	1.24707e-06
135.05	258.6	2		0.302046	0.611537	0.00726581	-3.98657	-0.114222		2009-04-08	0.304023	0.604055	-0.00295241	-3.96511	-0.345407			2009-04-08	0.30007	0.61902	0.017484	-4.00803	0.116964																								3.90796e-06	5.59909e-05	0.000104412
137.05	266.6	2		0.306105	0.613043	-9.22058e-05	-5.75362	-1.65644																		2009-07-06	0.309154	0.618851	0.00304148	-4.65761	-1.30704			2009-07-10	0.303055	0.607235	-0.00322589	-6.84963	-2.00584
139.05	274.7	2		0.305177	0.603493	-0.00543782	-4.6786	-1.1229		2009-04-08	0.305322	0.600697	-0.00951806	-5.45517	-1.6671			2009-04-08	0.305032	0.606289	-0.00135758	-3.90202	-0.578705																								2.0919e-08	7.81685e-06	1.66484e-05
141.05	284.5	2		0.313678	0.627053	-0.00430593	-6.23098	-1.38809		2009-04-04	0.313207	0.629157	-0.00266406	-6.70915	-1.55284			2009-04-04	0.31415	0.624948	-0.00594779	-5.75281	-1.22334																								2.2275e-07	4.42995e-06	2.69572e-06
143.05	293.1	2		0.310047	0.624771	0.00490602	-4.13345	-0.284356		2009-04-07	0.31046	0.621427	0.004078	-3.27192	-0.1685			2009-04-08	0.309635	0.628114	0.00573403	-4.99499	-0.400213																								1.703e-07	1.11771e-05	6.85614e-07
145.05	301.7	2		0.305681	0.596428	-0.0138218	-4.53623	-0.910525		2009-04-02	0.307742	0.609382	-0.00550722	-4.22607	-0.474477											2009-07-06	0.303621	0.583473	-0.0221364	-4.84639	-1.34657																4.24734e-06	0.000167822	6.91328e-05
147.05	310.4	2		0.29778	0.60669	0.00722347	-5.85504	-1.16726		2009-04-02	0.295263	0.603641	0.0107908	-5.23728	-0.92759			2009-04-02	0.300297	0.609738	0.00365618	-6.47281	-1.40692																								6.33617e-06	9.292e-06	1.27255e-05
149.05	319.2	2		0.3086	0.598213	-0.0116583	-2.81064	-0.556896		2009-04-03	0.308818	0.594291	-0.0161104	-2.65699	-0.383157			2009-04-04	0.308382	0.602136	-0.00720615	-2.96428	-0.730636																								4.74721e-08	1.5384e-05	1.98216e-05
151.05	327.3	2		0.305466	0.603531	-0.00362389	-2.76851	0.24143		2009-04-03	0.302694	0.606866	0.00524213	-2.48063	0.505431			2009-04-03	0.308238	0.600196	-0.0124899	-3.05639	-0.0225713																								7.68603e-06	1.11203e-05	7.86063e-05
153.05	336.7	2		0.295965	0.588186	-0.00219738	-3.65693	-0.21864		2009-04-02	0.296436	0.582551	-0.00545235	-2.12318	0.5634			2009-04-02	0.295494	0.593822	0.00105759	-5.19067	-1.00068																								2.21984e-07	3.17555e-05	1.05948e-05
155.05	345.2	3		0.298421	0.601666	0.000891932	-6.76694	-2.05395		2009-04-02	0.295933	0.59858	0.00389128	-6.6662	-2.21946			2009-04-02	0.299429	0.596044	-0.00892635	-7.38298	-2.17211			2009-07-06	0.2999	0.610374	0.00771087	-6.25163	-1.77029																6.18659e-06	9.52417e-06	8.99606e-06
157.05	353.6	2		0.302661	0.601659	-0.00219551	-4.11865	-0.601866		2009-04-01	0.301455	0.605709	0.00229627	-4.6189	-0.670213			2009-04-01	0.303867	0.597609	-0.00668729	-3.61841	-0.533518																								1.45442e-06	1.64021e-05	2.01761e-05
159.05	362.9	2		0.307524	0.599013	-0.00962524	-2.21259	0.225634		2009-04-01	0.305193	0.595103	-0.0074018	-1.9594	0.131819			2009-04-01	0.309854	0.602923	-0.0118487	-2.46578	0.319449																								5.43143e-06	1.52903e-05	4.94367e-06
161.05	372.1	2		0.296146	0.591016	0.00164411	-3.43485	-0.300828		2009-03-31	0.299454	0.595561	0.000343572	-3.57608	-0.582973			2009-03-31	0.292837	0.586471	0.00294465	-3.29361	-0.018682																								1.09458e-05	2.06596e-05	1.6914e-06
163.05	381.1	2		0.303063	0.585043	-0.0104597	-0.882208	0.571409										2009-03-31	0.302601	0.593954	-0.00303075	-0.586294	1.38876			2009-07-06	0.303525	0.576133	-0.0178887	-1.17812	-0.245937
165.05	389	2		0.311441	0.595766	-0.0202423	-2.84108	-0.463792		2009-03-31	0.310365	0.595942	-0.0210952	-3.90247	-0.816792			2009-03-31	0.312517	0.595589	-0.0193894	-1.7797	-0.110793																								1.15766e-06	3.11818e-08	7.27393e-07
167.05	399.1	2		0.307255	0.608259	-0.00437212	-3.55242	-0.0978222		2009-03-31	0.306674	0.609726	0.000372608	-2.45726	0.509882			2009-03-31	0.307836	0.606792	-0.00911685	-4.64758	-0.705527																								3.37841e-07	2.15291e-06	2.25124e-05
169.05	406.9	2		0.297802	0.591331	-0.00246959	-4.42484	-1.01614										2009-03-30	0.293784	0.590466	0.00289289	-5.32679	-1.53856			2009-07-06	0.301819	0.592197	-0.00783207	-3.5229	-0.493714
171.05	415.8	2		0.307292	0.615794	-0.000763993	-5.40005	-1.06813		2009-03-28	0.306121	0.605763	-0.00683269	-5.1615	-1.19956											2009-07-06	0.308463	0.625824	0.00530471	-5.6386	-0.936701																1.37052e-06	0.000100612	3.68291e-05
173.05	424.7	2		0.307108	0.60896	-0.00387212	-3.95312	-0.384602		2009-03-30	0.30685	0.612974	-0.000299815	-4.41339	-0.628983			2009-03-30	0.307366	0.604947	-0.00744443	-3.49286	-0.140222																								6.65516e-08	1.61094e-05	1.27614e-05
175.05	433.8	2		0.309343	0.615043	-0.00185767	-5.31171	-1.79238		2009-03-28	0.305158	0.597698	-0.00930315	-4.81417	-1.67308			2009-03-28	0.313529	0.632389	0.00558781	-5.80924	-1.91169																								1.75176e-05	0.000300866	5.54352e-05
177.05	443	2		0.308982	0.609702	-0.00394157	-2.99647	-0.0744138		2009-03-30	0.309287	0.613113	0.000419542	-2.2417	0.327572			2009-03-30	0.308677	0.60629	-0.00830268	-3.75124	-0.4764																								9.31141e-08	1.16383e-05	1.90193e-05
179.05	451.3	2		0.304935	0.592877	-0.0113735	-2.82445	-0.223632		2009-03-30	0.304752	0.600693	-0.00561238	-3.33065	-0.190573			2009-03-30	0.305117	0.585061	-0.0171346	-2.31826	-0.256691																								3.32895e-08	6.10895e-05	3.31902e-05
181.05	460.4	2		0.304512	0.580625	-0.0187222	-2.15633	-0.462522		2009-03-27	0.296933	0.569795	-0.0144697	-2.37109	-0.718621			2009-03-27	0.31209	0.591456	-0.0229747	-1.94158	-0.206424																								5.74394e-05	0.000117304	1.80837e-05
183.05	469.4	2		0.29377	0.572695	-0.00881838	-3.99894	-1.55957		2009-03-27	0.295342	0.569174	-0.016967	-4.56976	-1.78196			2009-03-27	0.292199	0.576217	-0.000669778	-3.42812	-1.33718																								2.4693e-06	1.24001e-05	6.63996e-05
185.05	478.3	2		0.299978	0.597907	0.00137587	-2.52638	0.513162		2009-03-27	0.298252	0.599222	0.00147099	-4.53879	-0.453038			2009-03-27	0.301704	0.596592	0.00128076	-0.513974	1.47936																								2.97952e-06	1.72899e-06	9.04746e-09
187.05	487.3	3		0.293513	0.576597	-0.0035812	-2.40192	-0.170321		2009-03-25	0.290442	0.564052	-0.0100779	-3.24365	-1.00304			2009-03-25	0.297605	0.590783	-0.00113157	-2.81898	0.234294			2009-07-06	0.292491	0.574955	0.000465852	-1.14313	0.257786																9.42869e-06	0.000157355	4.22068e-05
189.05	496.5	2		0.295672	0.582551	-0.00302115	-3.16805	-0.670062		2009-03-25	0.297233	0.582268	-0.00554678	-3.30507	-0.986062			2009-03-25	0.294111	0.582835	-0.000495528	-3.03104	-0.354062																								2.43574e-06	8.06002e-08	6.37879e-06
191.05	504.8	2		0.299166	0.584143	-0.00750243	-4.49655	-2.15115		2009-03-26	0.297373	0.60078	0.010418	-5.26665	-2.41683			2009-03-26	0.300958	0.567505	-0.0254229	-3.72645	-1.88547																								3.21326e-06	0.000276798	0.000321142
193.05	513.1	2		0.301151	0.621911	0.0150464	-5.87919	-1.0191		2009-03-24	0.301193	0.619791	0.0127953	-6.66685	-1.7838			2009-03-24	0.301108	0.624031	0.0172975	-5.09154	-0.254393																								1.7836e-09	4.49297e-06	5.06748e-06
195.05	522.4	2		0.305996	0.597144	-0.00828504	-2.92328	-0.520069		2009-03-24	0.308955	0.601539	-0.0104742	-3.21154	-0.633439			2009-03-24	0.303036	0.592748	-0.00609588	-2.63503	-0.406699																								8.75896e-06	1.93197e-05	4.79242e-06
197.05	531.7	2		0.299706	0.601306	0.00519764	-3.87473	-0.78995		2009-03-24	0.299697	0.600001	0.00574651	-3.51825	-0.843338			2009-03-24	0.299715	0.602611	0.00464878	-4.23122	-0.736562																								8.07758e-11	1.70284e-06	3.01252e-07
199.05	540	2		0.310657	0.611042	-0.00322104	-2.9056	-0.572654		2009-03-24	0.309304	0.604821	-0.00751308	-3.44179	-0.940408			2009-03-24	0.312009	0.617262	0.00107101	-2.36942	-0.204901																								1.82916e-06	3.86942e-05	1.84217e-05
201.05	548.3	2		0.313596	0.615093	-0.00962113	-3.04137	0.324397		2009-03-19	0.3142	0.615131	-0.0105413	-3.35387	-0.033327			2009-03-19	0.312992	0.615055	-0.008701	-2.72887	0.682122																								3.64542e-07	1.43125e-09	8.46642e-07
203.05	557.8	2		0.312491	0.591714	-0.0217349	-2.09657	-0.748387		2009-03-19	0.313722	0.598964	-0.0185399	-3.01863	-1.29524			2009-03-19	0.31126	0.584464	-0.0249299	-1.1745	-0.20153																								1.51479e-06	5.25651e-05	1.02078e-05
205.05	567.2	2		0.298036	0.590532	-0.00197001	-4.92561	-1.89673		2009-03-19	0.297475	0.587911	-0.0022532	-4.88277	-2.12626			2009-03-19	0.298598	0.593152	-0.00168682	-4.96845	-1.6672																								3.15662e-07	6.86535e-06	8.01975e-08
207.05	575.4	2		0.304897	0.587008	-0.0144956	-0.987293	0.996461		2009-03-23	0.304559	0.575629	-0.0245293	-2.15214	-0.300201			2009-03-23	0.305236	0.598388	-0.00446181	0.177556	2.29312																								1.14629e-07	0.000129493	0.000100677
209.05	584.4	2		0.298138	0.596522	0.00232012	-3.66949	-0.329852		2009-03-19	0.293002	0.584708	-0.000661049	-4.50121	-0.873061			2009-03-19	0.303275	0.608336	0.0053013	-2.83777	0.213357																								2.63812e-05	0.000139576	8.88739e-06
211.05	593.6	2		0.295439	0.57821	-0.00858367	-3.9964	-1.11563		2009-03-23	0.293317	0.578725	-0.0029739	-3.90947	-1.23492			2009-03-23	0.29756	0.577696	-0.0141934	-4.08332	-0.996347																								4.49966e-06	2.6484e-07	3.14695e-05
213.05	602.8	2		0.304759	0.600954	-0.00373929	-3.34554	-0.563006		2009-03-23	0.303295	0.596972	-0.00456591	-3.51779	-0.79429			2009-03-23	0.306223	0.604935	-0.00291267	-3.17329	-0.331721																								2.14316e-06	1.58501e-05	6.83296e-07
215.05	611.1	2		0.296005	0.578722	-0.00566911	-1.50302	0.564894		2009-03-13	0.29497	0.567035	-0.0138016	-0.478102	1.2389			2009-03-13	0.29704	0.590408	0.00246337	-2.52794	-0.109115																								1.07212e-06	0.000136575	6.61372e-05
217.05	620.7	2		0.29002	0.577969	0.00200493	-3.97876	-1.14035		2009-03-10	0.290728	0.585404	0.00728699	-4.44349	-1.42975			2009-03-10	0.289312	0.570533	-0.00327713	-3.51404	-0.850959																								5.0132e-07	5.52878e-05	2.79002e-05
219.05	629.1	2		0.291527	0.569786	-0.0065799	-3.99576	-1.72038		2009-03-11	0.291889	0.556096	-0.0135112	-1.55832	-0.965432			2009-03-12	0.291166	0.583476	0.000351365	-6.43321	-2.47532																								1.30733e-07	0.00018741	4.80424e-05
221.05	637.2	2		0.30011	0.602757	0.00570047	-2.41408	0.682327		2009-03-17	0.300219	0.600885	0.00420532	-2.52973	0.438521			2009-03-17	0.3	0.604628	0.00719562	-2.29843	0.926134																								1.19133e-08	3.50078e-06	2.23547e-06
223.07	646.3	2		0.304277	0.600589	-0.0038914	-4.60046	-1.637										2009-03-10	0.305346	0.609794	-0.00189087	-6.50993	-2.39241			2009-07-07	0.303208	0.591383	-0.00589194	-2.69099	-0.881591
225.05	655.1	2		0.303984	0.607372	0.000153989	-4.44047	-0.750048		2009-03-12	0.302588	0.593503	-0.0102372	-3.6673	-0.151013											2009-07-06	0.305381	0.621242	0.0105452	-5.21364	-1.34908																1.95047e-06	0.00019236	0.000107978
227.05	663.9	2		0.292554	0.587404	0.00311979	-6.32031	-2.7091		2009-03-13	0.29286	0.584546	0.00239566	-5.87267	-2.87038			2009-03-13	0.292248	0.590261	0.00384392	-6.76794	-2.54782																								9.35038e-08	8.1646e-06	5.24365e-07
229.05	672.9	2		0.298614	0.604727	0.00940641	-3.25286	0.120844		2009-03-17	0.29827	0.597178	0.00401368	-1.96748	1.06026											2009-07-08	0.298959	0.612276	0.0147991	-4.53825	-0.818575																1.18546e-07	5.69873e-05	2.90815e-05
231.05	682	2		0.296465	0.575407	-0.00715342	-1.82532	-0.354466		2009-03-17	0.292091	0.570964	-0.00441919	-2.57652	-0.783546			2009-03-17	0.300839	0.57985	-0.00988766	-1.07411	0.0746136																								1.91287e-05	1.97415e-05	7.47604e-06
233.05	690.3	2		0.302461	0.594256	-0.003175	-3.56618	-1.38596		2009-03-12	0.300852	0.590669	-0.00164886	-3.08614	-1.34368			2009-03-12	0.304069	0.597842	-0.00470114	-4.04623	-1.42825																								2.58742e-06	1.28603e-05	2.32912e-06
235.05	698.8	2		0.310807	0.609174	-0.00454005	-1.81702	0.313183		2009-03-12	0.309769	0.613509	0.000236243	-2.18212	0.305688			2009-03-12	0.311845	0.604838	-0.00931635	-1.45193	0.320678																								1.07836e-06	1.87974e-05	2.2813e-05
237.05	707.4	2		0.311454	0.609817	-0.00426668	-0.180325	1.72615		2009-03-16	0.310303	0.599273	-0.0120379	-0.135588	1.65707			2009-03-16	0.312604	0.62036	0.00350457	-0.225062	1.79523																								1.32317e-06	0.000111164	6.03923e-05
239.05	716	2		0.305483	0.608704	0.00180511	-2.67757	0.267224		2009-03-16	0.30469	0.615368	0.0104304	-3.24513	-0.380533			2009-03-16	0.306276	0.60204	-0.00682017	-2.11001	0.914982																								6.28968e-07	4.44065e-05	7.43954e-05
241.05	724.5	2		0.293476	0.588584	0.00554463	-5.22547	-2.30379		2009-03-16	0.293649	0.588048	0.00452756	-5.79643	-2.83472			2009-03-16	0.293303	0.58912	0.00656169	-4.65452	-1.77286																								2.99172e-08	2.87391e-07	1.03442e-06
243.05	732.8	2		0.296736	0.582298	-0.00592673	-4.31198	-1.67236		2009-03-17	0.296179	0.593747	0.00344824	-5.61536	-2.25769			2009-03-17	0.297293	0.570848	-0.0153017	-3.00859	-1.08703																								3.10372e-07	0.0001311	8.78901e-05
245.05	742.2	2		0.299982	0.606712	0.00916147	-4.00038	-0.715497		2009-03-23	0.300476	0.610325	0.00814907	-4.75097	-0.649237			2009-03-23	0.299489	0.603098	0.0101739	-3.24979	-0.781757																								2.43785e-07	1.30574e-05	1.02497e-06
247.05	751.6	2		0.301324	0.590888	-0.0050501	-2.50216	-0.175557		2009-03-16	0.298552	0.593935	0.00330332	-2.87202	-0.509659			2009-03-16	0.304096	0.587841	-0.0134035	-2.1323	0.158545																								7.68375e-06	9.28566e-06	6.97796e-05
249.05	758.9	2		0.298924	0.607933	0.0127803	-2.67078	0.523103		2009-03-09	0.293433	0.592756	0.0122116	-1.77295	0.563925											2009-07-08	0.304414	0.62311	0.013349	-3.56862	0.482281																3.01444e-05	0.00023034	3.23407e-07
251.05	768.4	2		0.301357	0.594259	-0.00160397	-2.72254	-0.423213		2009-03-11	0.29921	0.590693	-0.00156013	-3.43497	-0.99123			2009-03-11	0.303504	0.597825	-0.00164781	-2.01012	0.144803																								4.60993e-06	1.27183e-05	1.92176e-09
253.05	776.7	2		0.291405	0.576363	0.00191135	-2.16709	-0.288765		2009-03-11	0.292652	0.582575	0.00545647	-1.3301	0.583312			2009-03-11	0.290158	0.570152	-0.00163377	-3.00407	-1.16084																								1.55473e-06	3.85864e-05	1.25679e-05
255.05	786.1	2		0.299199	0.590917	0.000834278	-2.37779	-0.423801		2009-03-10	0.301896	0.596252	-6.54706e-05	-1.67078	0.478925			2009-03-10	0.296502	0.585582	0.00173403	-3.08481	-1.32653																								7.27501e-06	2.84595e-05	8.09547e-07
257.05	794.4	2		0.308039	0.612734	0.00107217	-2.80035	0.0900361		2009-05-05	0.308901	0.618929	0.00384348	-3.38524	-0.10448			2009-05-05	0.307177	0.60654	-0.00169915	-2.21547	0.284552																								7.42466e-07	3.83722e-05	7.68018e-06
259.05	802.8	2		0.309774	0.609811	-8.75322e-06	-0.549629	1.15028		2009-05-08	0.31274	0.607247	-0.0106279	-0.689981	1.50321			2009-05-09	0.306807	0.612376	0.0106104	-0.409277	0.797353																								8.79935e-06	6.57832e-06	0.000112767
261.05	812.2	2		0.303484	0.61117	0.00517565	-4.24573	-0.611479		2009-04-30	0.304935	0.613122	0.00298198	-5.27239	-1.33678			2009-04-30	0.302033	0.609219	0.00736932	-3.21907	0.113819																								2.10583e-06	3.80823e-06	4.81221e-06
263	819.7	3		0.308231	0.618268	0.00262486	-2.87544	0.809828										2009-05-06	0.31506	0.631444	-0.00169545	-3.7104	0.887995			2009-07-07	0.3039	0.61702	0.0123216	-1.06558	2.05389			2009-07-10	0.305733	0.606341	-0.00275153	-3.85034	-0.512403
265.05	828.3	2		0.305195	0.599471	0.00184045	-1.62318	-0.611221		2009-04-30	0.30291	0.598871	0.00687379	-2.12175	-1.35458			2009-04-30	0.30748	0.600071	-0.00319289	-1.12461	0.132143																								5.22098e-06	3.59805e-07	2.53345e-05
267.05	836.9	2		0.299219	0.593562	0.000622221	-3.23391	-0.646332		2009-05-01	0.297432	0.596232	0.00662443	-3.76188	-1.12711			2009-05-01	0.301007	0.590892	-0.00537999	-2.70595	-0.165559																								3.19411e-06	7.13003e-06	3.60265e-05
269.05	845.3	2		0.305815	0.59515	-0.00914574	-0.498408	1.69548		2009-04-30	0.305809	0.603565	-0.0018597	-0.544068	1.90176			2009-04-30	0.305821	0.586734	-0.0164318	-0.452749	1.48919																								3.47667e-11	7.08187e-05	5.30864e-05
271.05	854.5	2		0.314	0.635478	0.00671455	-4.91658	-0.80472		2009-05-08	0.31567	0.637963	0.00494016	-4.69913	-0.374654			2009-05-08	0.31233	0.632993	0.00848894	-5.13403	-1.23479																								2.78864e-06	6.17637e-06	3.14845e-06
273.05	863.6	2		0.306123	0.619232	0.00671116	-4.86875	-0.928584		2009-05-08	0.305172	0.623118	0.0139362	-3.74952	-0.150952			2009-05-08	0.307074	0.615346	-0.000513836	-5.98797	-1.70622																								9.03963e-07	1.5102e-05	5.22005e-05
275.05	871.8	2		0.303951	0.605563	0.000585816	-3.19176	6.51247e-05		2009-05-01	0.303931	0.612694	0.00912179	-2.73527	0.148694			2009-05-01	0.303972	0.598433	-0.00795016	-3.64825	-0.148564																								4.05584e-10	5.08457e-05	7.28628e-05
277.05	880.1	2		0.303411	0.609897	0.00653419	-3.19117	-0.121144		2009-04-17	0.303901	0.6127	0.00726162	-3.37254	-0.0544949			2009-04-17	0.302921	0.607095	0.00580677	-3.0098	-0.187792																								2.39853e-07	7.85406e-06	5.29146e-07
279.05	887.3	2		0.30259	0.615905	0.00414117	-5.64478	-0.332142		2009-05-07	0.305162	0.606745	-0.00622754	-4.1825	0.261918			2009-05-07	0.300019	0.625064	0.0145099	-7.10707	-0.926202																								6.61278e-06	8.38926e-05	0.00010751
281.05	896.4	2		0.316238	0.608105	-0.0111148	-1.10981	-0.126441		2009-05-07	0.315784	0.605909	-0.0124994	-0.964384	0.0346465			2009-05-08	0.316693	0.610301	-0.00973014	-1.25523	-0.287528																								2.06811e-07	4.82276e-06	1.91715e-06
283.05	904.4	2		0.309498	0.611393	-0.00458035	-2.56014	0.645171		2009-05-04	0.311045	0.613558	-0.00497899	-2.47197	0.627535			2009-05-04	0.307951	0.609228	-0.00418171	-2.64832	0.662807																								2.39439e-06	4.68806e-06	1.58913e-07
285.05	913.2	2		0.297856	0.593261	0.00335887	-2.73215	-0.231936		2009-04-30	0.296683	0.604658	0.0165255	-3.1911	-0.56635			2009-04-30	0.299029	0.581864	-0.00980781	-2.27321	0.102477																								1.37582e-06	0.000129887	0.000173361
287.05	922	2		0.301094	0.593941	0.00131628	-2.33366	-0.639893		2009-05-04	0.302171	0.584689	-0.0073935	-1.93389	-0.831605			2009-05-04	0.300016	0.603193	0.0100261	-2.73343	-0.448181																								1.16109e-06	8.55995e-05	7.58603e-05
289.05	929.7	2		0.303192	0.599398	0.00134234	-1.72668	0.246456		2009-05-09	0.303397	0.600456	0.0011915	-1.75611	0.395079			2009-05-09	0.302987	0.59834	0.00149318	-1.69726	0.0978324																								4.20475e-08	1.1199e-06	2.2753e-08
291.05	938.4	2		0.308437	0.610126	0.00113039	-1.42257	0.687063		2009-05-09	0.309497	0.605363	-0.00608595	-2.15403	0.0492439			2009-05-09	0.307378	0.614888	0.00834673	-0.691104	1.32488																								1.12251e-06	2.26826e-05	5.20756e-05
293.05	946.2	2		0.311454	0.621703	0.00498704	-3.21245	-0.67923		2009-05-05	0.309239	0.612806	0.00147394	-3.58675	-1.27534			2009-05-06	0.31367	0.630601	0.00850013	-2.83815	-0.0831217																								4.90962e-06	7.91612e-05	1.23418e-05
295.05	954.9	2		0.303678	0.619503	0.0118292	-4.63443	-0.708333		2009-05-07	0.302488	0.623483	0.0174958	-5.71131	-1.62538			2009-05-07	0.304869	0.615524	0.00616256	-3.55755	0.208716																								1.41666e-06	1.58357e-05	3.21106e-05
297.05	963.8	2		0.310896	0.609267	-0.003985	-2.95166	-0.944146		2009-05-05	0.309225	0.603429	-0.00619334	-2.39463	-0.472379			2009-05-05	0.312568	0.615104	-0.00177665	-3.50869	-1.41591																								2.79341e-06	3.40784e-05	4.87678e-06
299.05	971.6	2		0.316991	0.627325	-0.00260231	-1.96185	1.06716		2009-04-22	0.318116	0.627927	-0.00344801	-2.27659	0.589659			2009-04-22	0.315866	0.626724	-0.00175661	-1.64711	1.54467																								1.26542e-06	3.61801e-07	7.15211e-07
301.05	980.6	2		0.310778	0.613526	0.00216936	-2.3815	-0.748904		2009-04-22	0.310936	0.618059	0.00785516	-1.75757	-0.457046			2009-04-22	0.310619	0.608993	-0.00351644	-3.00543	-1.04076																								2.51552e-08	2.05506e-05	3.23283e-05
301.19	981.6	2		0.314129	0.630633	0.00590373	-2.08764	1.03645		2009-04-28	0.314074	0.62603	0.00378819	-1.81559	0.77986			2009-04-28	0.314183	0.635237	0.00801927	-2.35968	1.29304																								2.94279e-09	2.11923e-05	4.47551e-06
303.05	988.6	2		0.314487	0.620153	-0.0012076	-2.67968	-0.44307		2009-04-28	0.314394	0.614317	-0.00697137	-3.28401	-1.01405			2009-04-28	0.314579	0.62599	0.00455617	-2.07535	0.12791																								8.53736e-09	3.40642e-05	3.3221e-05
305.05	997.8	2		0.318477	0.62842	-0.00476176	-3.07926	0.0413615		2009-04-29	0.317708	0.629589	-0.00212417	-3.06143	0.0682049			2009-04-29	0.319247	0.627251	-0.00739935	-3.09709	0.0145182																								5.9197e-07	1.36689e-06	6.95688e-06
307.05	1005.9	2		0.319169	0.619269	-0.00632145	-0.0958711	1.00741		2009-04-29	0.31783	0.620988	-0.000988464	0.160359	1.04288			2009-04-29	0.320509	0.617551	-0.0116544	-0.352101	0.971939																								1.79433e-06	2.95338e-06	2.84407e-05
309.05	1014.2	2		0.317563	0.626399	-0.000192554	-2.91129	-0.849124		2009-04-27	0.317092	0.623619	-0.00261074	-3.59267	-1.39591			2009-04-27	0.318034	0.629179	0.00222563	-2.22991	-0.302342																								2.21714e-07	7.7262e-06	5.84762e-06
311.05	1022.5	2		0.31387	0.629473	0.00613959	-2.25019	0.680658		2009-04-28	0.313613	0.623648	0.000786366	-2.2875	0.651187			2009-04-28	0.314127	0.635298	0.0114928	-2.21288	0.71013																								6.61383e-08	3.39328e-05	2.8657e-05
313.05	1031.9	2		0.317847	0.623415	-0.00598132	-1.58961	0.946901		2009-05-04	0.318472	0.627725	-0.00411621	-2.36338	0.453105			2009-05-04	0.317222	0.619106	-0.00784644	-0.815831	1.4407																								3.907e-07	1.85684e-05	3.47866e-06
315.05	1040.3	2		0.307912	0.590723	-0.0113067	-0.896225	-0.101643		2009-05-04	0.308739	0.585373	-0.0204906	-3.32293	-2.00363			2009-05-04	0.307085	0.596072	-0.00212273	1.53048	1.80034																								6.83614e-07	2.86147e-05	8.43447e-05
317.05	1048.8	2		0.311788	0.631405	0.0107745	-3.61325	-0.356279		2009-04-16	0.315221	0.636908	0.0104935	-2.88592	0.149248			2009-04-16	0.308355	0.625901	0.0110554	-4.34059	-0.861806																								1.17854e-05	3.02882e-05	7.89129e-08
319.05	1057.3	2		0.310639	0.629665	0.0109942	-2.86953	0.441298		2009-04-24	0.311636	0.625569	0.00512353	-3.16236	0.112617			2009-04-24	0.309641	0.633761	0.0168649	-2.5767	0.76998																								9.94567e-07	1.67785e-05	3.44648e-05
321.05	1065.7	2		0.311159	0.622141	0.00443145	-2.56705	0.302419		2009-04-24	0.309166	0.622759	0.0114715	-2.46712	-0.151447			2009-04-24	0.313152	0.621522	-0.00260861	-2.66699	0.756284																								3.9735e-06	3.82413e-07	4.95624e-05
323.05	1073.9	2		0.312883	0.618108	-0.000415036	-2.70811	-0.402347		2009-04-28	0.313082	0.62432	0.00674162	-2.29561	-0.290567			2009-04-28	0.312683	0.611897	-0.0075717	-3.12061	-0.514127																								3.97924e-08	3.85867e-05	5.12178e-05
325.05	1083.2	2		0.310507	0.613975	0.000699033	-1.97903	0.18693		2009-04-27	0.311148	0.617302	0.00126398	-2.58868	-0.0819042			2009-04-27	0.309866	0.610647	0.000134081	-1.36938	0.455765																								4.10429e-07	1.10718e-05	3.1917e-07
327.05	1091.5	2		0.303381	0.611367	0.0102208	-1.43236	1.13503		2009-04-24	0.301265	0.607502	0.0107691	-1.95142	0.566847			2009-04-24	0.305497	0.615233	0.00967251	-0.9133	1.70321																								4.47657e-06	1.49431e-05	3.00611e-07
329.05	1099.7	2		0.30808	0.613811	0.00576129	-0.682169	1.36225		2009-04-24	0.307608	0.604931	-0.00342536	-1.75254	0.580026			2009-04-24	0.308551	0.622691	0.0149479	0.388199	2.14447																								2.22654e-07	7.88586e-05	8.43946e-05
331.05	1108	2		0.30639	0.617946	0.010147	-1.02149	1.70336		2009-04-27	0.306987	0.615819	0.0103363	0.616432	2.54793			2009-04-27	0.305794	0.620072	0.00995772	-2.65942	0.858799																								3.55836e-07	4.5223e-06	3.5839e-08
333.2	1117.2	2		0.301575	0.626327	0.0217931	-5.94928	-1.7846		2009-04-27	0.30017	0.62519	0.0237305	-6.92686	-2.81674			2009-04-27	0.30298	0.627465	0.0198557	-4.9717	-0.752465																								1.97322e-06	1.2938e-06	3.7536e-06
335.05	1125.4	2		0.306805	0.602322	-0.000839063	-0.194743	1.31688		2009-04-20	0.303183	0.595939	-7.11971e-05	-0.316777	1.18816			2009-04-20	0.310427	0.608704	-0.00160693	-0.0727091	1.44559																								1.31187e-05	4.07357e-05	5.89618e-07
337.05	1133.6	3		0.308238	0.626318	0.0134249	-3.19125	-0.109655		2009-04-17	0.315221	0.636908	0.0104935	-2.88592	0.149248			2009-04-17	0.308355	0.625901	0.0110554	-4.34059	-0.861806			2009-07-10	0.301137	0.616144	0.0187257	-2.34724	0.383592																4.87671e-05	0.000112157	8.5926e-06
339.05	1141.7	2		0.300952	0.607711	0.00993359	-5.31883	-2.38277		2009-04-20	0.296432	0.596653	0.0116216	-5.02443	-2.94511			2009-04-20	0.305473	0.618769	0.00824556	-5.61324	-1.82044																								2.04375e-05	0.000122278	2.84945e-06
341.05	1150.8	2		0.296938	0.594195	0.00665054	-2.75773	-0.379293		2009-04-20	0.295154	0.584724	0.00429335	-2.38757	-0.80991			2009-04-20	0.298722	0.603665	0.00900773	-3.12789	0.0513247																								3.18232e-06	8.96828e-05	5.55634e-06
343.05	1158.8	2		0.303914	0.611423	0.0117138	-1.59278	0.430171		2009-04-21	0.304058	0.616566	0.0165614	-2.32197	-0.285065			2009-04-21	0.30377	0.606281	0.00686614	-0.863592	1.14541																								2.07566e-08	2.64432e-05	2.34996e-05
345.05	1166.9	2		0.301317	0.603954	0.00832036	-3.49803	-1.22012		2009-04-21	0.302055	0.605962	0.00925715	-4.74082	-2.52672			2009-04-21	0.300579	0.601945	0.00738357	-2.25525	0.0864862																								5.44928e-07	4.03382e-06	8.77569e-07
347.22	1175.9	2		0.312281	0.623305	0.0029485	-2.28061	0.682285		2009-04-21	0.312935	0.626699	0.00676556	-2.26546	0.321382			2009-04-21	0.311627	0.619911	-0.000868547	-2.29577	1.04319																								4.2759e-07	1.15205e-05	1.45699e-05
349.05	1183.7	2		0.314174	0.624141	0.00258553	-1.127	1.26334		2009-04-20	0.313402	0.62522	0.00489049	-1.26168	1.19471			2009-04-20	0.314947	0.623062	0.000280579	-0.992321	1.33198																								5.96518e-07	1.16408e-06	5.31282e-06
351.05	1192.4	2		0.319792	0.630648	-0.00171241	-0.266717	2.06061		2009-04-21	0.319507	0.628968	-0.00153011	0.014638	2.05101			2009-04-21	0.320078	0.632328	-0.00189471	-0.548071	2.07021																								8.15796e-08	2.82204e-06	3.32347e-08
353.19	1202	2		0.318678	0.626022	-0.00380564	-1.20946	1.05678		2009-04-15	0.317336	0.629875	-0.000560537	-2.69935	0.30409			2009-04-15	0.32002	0.622169	-0.00705075	0.280436	1.80946																								1.80052e-06	1.48465e-05	1.05307e-05
355.05	1208.9	2		0.321423	0.643452	0.00505067	-0.704862	2.25476		2009-04-14	0.319319	0.642394	0.00925215	-0.372757	2.33309			2009-04-14	0.323527	0.644511	0.000849185	-1.03697	2.17643																								4.42687e-06	1.12043e-06	1.76524e-05
357.05	1216.9	2		0.317835	0.639238	0.0038668	-5.2016	-1.28809		2009-04-14	0.317844	0.633116	-0.00193887	-4.70851	-0.876322			2009-04-14	0.317825	0.64536	0.00967247	-5.69469	-1.69987																								8.73958e-11	3.74757e-05	3.37059e-05
359.05	1226.2	2		0.316474	0.64147	0.0109643	-2.77235	0.620406		2009-04-16	0.313436	0.630112	0.0083516	-2.24199	0.530218			2009-04-16	0.319511	0.652827	0.013577	-3.3027	0.710595																								9.22738e-06	0.00012899	6.82623e-06
361.05	1234.5	2		0.305878	0.620661	0.00965164	-4.17466	-0.472157		2009-04-15	0.305483	0.613451	0.0028406	-4.28486	-0.497779			2009-04-15	0.306273	0.627872	0.0164627	-4.06446	-0.446536																								1.56134e-07	5.19918e-05	4.63902e-05
363.05	1242.7	2		0.306366	0.621373	0.0113355	-4.50488	-1.22244		2009-04-15	0.306557	0.621358	0.00798668	-6.89551	-2.92394			2009-04-15	0.306176	0.621387	0.0146843	-2.11424	0.479058																								3.62454e-08	2.09289e-10	1.12145e-05
365.05	1250.8	2		0.310676	0.618581	0.00751451	0.324743	1.89522		2009-04-14	0.309541	0.612945	0.00906724	2.21329	2.66234			2009-04-14	0.311812	0.624217	0.00596179	-1.5638	1.12809																								1.28947e-06	3.17643e-05	2.41096e-06
367.05	1258.8	2		0.304622	0.606737	0.00317719	-1.75206	0.815004		2009-04-15	0.306426	0.614115	0.00549724	-1.79915	1.10243			2009-04-15	0.302818	0.599359	0.000857149	-1.70497	0.527581																								3.25439e-06	5.44317e-05	5.38261e-06
369.05	1267.8	2		0.306641	0.615465	0.00783933	-2.42808	0.172041		2009-04-14	0.305706	0.605558	0.0010728	-2.46808	-0.154451			2009-04-14	0.307577	0.625372	0.0146059	-2.38807	0.498533																								8.75206e-07	9.81526e-05	4.57859e-05
371.05	1275.8	2		0.311787	0.615236	-0.0055723	-3.16456	0.125319		2009-04-17	0.312113	0.624259	0.00188314	-3.25797	0.237241			2009-04-17	0.31146	0.606213	-0.0130277	-3.07116	0.013396																								1.06837e-07	8.14155e-05	5.55836e-05
373.05	1283.6	2		0.311326	0.619952	0.00492392	-2.27213	-0.069761		2009-04-17	0.311428	0.60736	-0.00154015	-1.69461	-0.895018			2009-04-17	0.311223	0.632544	0.011388	-2.84966	0.755496																								1.05306e-08	0.000158564	4.17842e-05
375.05	1292.3	2		0.303352	0.618577	0.0162494	-3.86242	-0.984613		2009-04-16	0.303656	0.626864	0.0237467	-4.11703	-1.19273			2009-04-16	0.303048	0.61029	0.00875206	-3.60781	-0.776492																								9.23361e-08	6.86752e-05	5.62099e-05
377.05	1301.9	2		0.302733	0.625821	0.018922	-5.26156	-1.08756		2009-04-16	0.302404	0.634089	0.0262851	-6.18513	-1.65525			2009-04-16	0.303062	0.617553	0.0115589	-4.33798	-0.519869																								1.08272e-07	6.83588e-05	5.42152e-05
378.05	1304.7	3		0.29564	0.593087	0.00595739	-2.43428	0.408737		2009-04-10	0.29262	0.584162	0.00506445	-1.77096	0.599049			2009-04-10	0.297914	0.592272	0.00111275	-1.31812	1.41187			2009-07-10	0.296387	0.602826	0.011695	-4.21378	-0.784712																9.12344e-06	7.96478e-05	7.97352e-07
381.05	1318.1	2		0.304837	0.60576	0.00449846	-1.9323	0.0386832		2009-04-10	0.305645	0.603322	0.000714859	-1.41967	0.490443			2009-04-10	0.304029	0.608197	0.00828207	-2.44493	-0.413076																								6.52716e-07	5.94165e-06	1.43157e-05
383.21	1327	2		0.304771	0.62121	0.0154425	-2.51469	0.48612		2009-04-11	0.305715	0.62066	0.0113929	-3.80857	-0.42489			2009-04-11	0.303827	0.621759	0.0194922	-1.22081	1.39713																								8.90576e-07	3.01984e-07	1.63994e-05
385.05	1335.1	2		0.302298	0.608136	0.00653601	-4.63573	-1.45059		2009-04-10	0.301669	0.596	-0.000890334	-4.19182	-1.77836			2009-04-10	0.302928	0.620271	0.0139623	-5.07965	-1.12282																								3.96598e-07	0.00014728	5.51505e-05
387.05	1343.2	2		0.31214	0.627882	0.00762003	-3.74631	-0.720471		2009-05-14	0.312937	0.622091	0.00390329	-2.23971	-0.0384762			2009-05-14	0.311344	0.633674	0.0113368	-5.25292	-1.40247																								6.34273e-07	3.35397e-05	1.38142e-05
389.05	1351.4	2		0.318162	0.658097	0.0208512	-3.49355	0.664554		2009-05-15	0.313892	0.651268	0.0262257	-2.40315	0.896871			2009-05-15	0.322432	0.664926	0.0154766	-4.58396	0.432237																								1.82332e-05	4.66341e-05	2.88859e-05
391.26	1361.6	2		0.310982	0.622751	0.00570168	-1.78245	1.00621		2009-05-12	0.308651	0.622674	0.00825119	-2.44514	0.782865			2009-05-12	0.313312	0.622829	0.00315218	-1.11976	1.22955																								5.43064e-06	6.01739e-09	6.49996e-06
393.05	1368.6	2		0.304375	0.616401	0.0109257	-4.30562	-1.16974		2009-05-12	0.305077	0.616668	0.0102204	-3.49607	-0.462503			2009-05-12	0.303672	0.616134	0.011631	-5.11518	-1.87697																								4.93841e-07	7.13013e-08	4.97466e-07
395.05	1376.6	2		0.307448	0.620779	0.010255	-1.56664	1.30967		2009-05-13	0.307751	0.617008	0.00463968	-1.55927	1.5917			2009-05-13	0.307144	0.62455	0.0158704	-1.57401	1.02763																								9.23031e-08	1.42202e-05	3.15323e-05
397.05	1385.7	2		0.314179	0.625702	0.00394325	-3.15486	-0.690306		2009-05-13	0.312283	0.633842	0.0157457	-4.11219	-1.61928			2009-05-13	0.316076	0.617562	-0.00785916	-2.19754	0.238673																								3.59686e-06	6.62565e-05	0.000139297
398.7	1392.6	2		0.31995	0.66584	0.0225828	-3.06439	1.63777		2009-05-14	0.319988	0.668142	0.0264557	-2.83734	1.4989			2009-05-14	0.319912	0.663538	0.0187099	-3.29145	1.77665																								1.44062e-09	5.29776e-06	1.49996e-05
401.05	1401.4	2		0.323381	0.663681	0.0179559	-2.20453	1.54465		2009-05-11	0.320901	0.65531	0.0170811	-1.97547	1.19154			2009-05-12	0.32586	0.672053	0.0188307	-2.43358	1.89777																								6.14921e-06	7.00764e-05	7.6529e-07
403.05	1410.4	2		0.311941	0.635344	0.0129103	-4.54382	-0.941278		2009-05-11	0.313002	0.625486	0.000562064	-5.04925	-1.34909			2009-05-11	0.31088	0.645202	0.0252585	-4.0384	-0.53347																								1.12509e-06	9.71818e-05	0.000152479
405.05	1419.3	2		0.315142	0.628385	0.000512758	-1.58108	1.78892		2009-05-13	0.314485	0.612873	-0.0112793	-0.610635	2.2093			2009-05-13	0.3158	0.643898	0.0123048	-2.55152	1.36853																								4.32287e-07	0.000240633	0.000139053
407.05	1427.2	2		0.31361	0.622509	0.00197473	-4.20071	-1.74319		2009-05-12	0.313992	0.621013	0.000960211	-3.37878	-1.20565			2009-05-12	0.313227	0.624006	0.00298924	-5.02265	-2.28072																								1.46512e-07	2.2393e-06	1.02924e-06
409.05	1435.1	2		0.30332	0.613317	0.0115794	-3.21809	-0.466292		2009-05-26	0.301702	0.602466	0.00413683	-4.29585	-1.57817			2009-05-26	0.304938	0.624168	0.019022	-2.14034	0.645588																								2.61829e-06	0.000117739	5.53919e-05
411.05	1444.9	2		0.303453	0.618942	0.0182115	-3.90196	-1.41888		2009-05-22	0.302372	0.61085	0.0121787	-5.45774	-2.93655			2009-05-22	0.304535	0.627035	0.0242443	-2.34617	0.0987856																								1.16905e-06	6.54905e-05	3.63951e-05
412.81	1451.5	2		0.307362	0.636831	0.025015	-3.16117	0.0614456		2009-05-26	0.305033	0.634218	0.0250985	-3.66656	-0.0229778			2009-05-26	0.309691	0.639444	0.0249315	-2.65578	0.145869																								5.42399e-06	6.8283e-06	6.9707e-09
415.05	1460.9	2		0.316333	0.632651	0.00435986	-3.25216	-0.278992		2009-05-22	0.312842	0.627726	0.00756205	-3.62315	-0.924451			2009-05-22	0.319824	0.637575	0.00115768	-2.88117	0.366466																								1.21872e-05	2.42526e-05	1.0254e-05
417.05	1469.3	2		0.311336	0.633988	0.0142745	-4.12061	-0.862053		2009-05-22	0.310353	0.624659	0.0081172	-4.01814	-1.03452			2009-05-22	0.312319	0.643316	0.0204318	-4.22308	-0.689585																								9.66002e-07	8.70184e-05	3.79126e-05
419.05	1477.6	2		0.316812	0.620489	-0.000786408	-1.26882	-0.0783539		2009-05-22	0.314221	0.62338	0.00710723	-2.27243	-1.04767			2009-05-22	0.319403	0.617598	-0.00868004	-0.265208	0.890966																								6.7139e-06	8.35798e-06	6.23095e-05
422.95	1495.1	2		0.310189	0.62661	0.0127585	-3.48296	-1.02928		2009-05-27	0.307877	0.635245	0.0241347	-4.18379	-1.32316			2009-05-27	0.312502	0.617976	0.00138235	-2.78213	-0.735403																								5.3475e-06	7.45534e-05	0.000129417
424.7	1502.5	2		0.30778	0.629235	0.017972	-1.84865	1.05117		2009-05-26	0.303776	0.632125	0.0271525	-3.39555	-0.126007			2009-05-26	0.311783	0.626346	0.0087914	-0.301745	2.22834																								1.60284e-05	8.3504e-06	8.42829e-05
427.05	1512.7	2		0.313693	0.639741	0.0152325	-2.45511	0.814529		2009-05-20	0.316127	0.638686	0.00929871	-3.06356	0.237297			2009-05-21	0.311258	0.640796	0.0211664	-1.84666	1.39176																								5.92784e-06	1.11256e-06	3.52103e-05
429.05	1521.3	2		0.31612	0.652125	0.0228953	-2.93701	0.330317		2009-05-26	0.315461	0.65841	0.0308605	-2.94953	0.233022			2009-05-26	0.316779	0.64584	0.0149301	-2.92449	0.427611																								4.34499e-07	3.95025e-05	6.34438e-05
431.15	1531.4	2		0.310861	0.630558	0.0110998	-4.9828	-1.5616		2009-05-20	0.312388	0.622069	0.00172533	-5.7992	-2.83089			2009-05-20	0.309333	0.639047	0.0204742	-4.1664	-0.292317																								2.33404e-06	7.20684e-05	8.78801e-05
433.05	1538.8	2		0.307841	0.623026	0.0125162	-2.28709	0.427248		2009-05-19	0.305722	0.62232	0.014344	-3.92864	-0.830754			2009-05-19	0.30996	0.623732	0.0106885	-0.645541	1.68525																								4.48897e-06	4.98959e-07	3.34072e-06
435.05	1547.4	2		0.31095	0.632692	0.0170423	-4.21737	-1.68525		2009-05-19	0.307917	0.630617	0.0236387	-4.00893	-2.07834			2009-05-19	0.313982	0.634767	0.0104458	-4.42582	-1.29216																								9.19609e-06	4.30382e-06	4.35131e-05
437.05	1555.9	2		0.310234	0.64082	0.0168075	-5.55415	-0.850219		2009-05-19	0.308956	0.645618	0.0217412	-6.60757	-1.36437			2009-05-19	0.311512	0.636022	0.0118738	-4.50073	-0.336073																								1.63418e-06	2.30238e-05	2.43412e-05
439.19	1566.3	2		0.312338	0.644737	0.0191704	-4.14876	-0.0342419		2009-05-18	0.312539	0.640254	0.0142314	-6.10978	-1.95126			2009-05-18	0.312137	0.649219	0.0241095	-2.18773	1.88277																								4.05099e-08	2.00946e-05	2.43943e-05
441.05	1574.3	3		0.315479	0.641757	0.0198696	-1.30377	0.598186		2009-05-18	0.305094	0.631854	0.0324863	-3.03547	-1.5756			2009-05-18	0.317111	0.643935	0.0180505	-0.520294	1.54429			2009-07-08	0.324233	0.649481	0.00907191	-0.355531	1.82587																0.000107844	9.80636e-05	0.000159182
443.05	1583.2	2		0.315297	0.645021	0.0165233	-1.73704	1.70614		2009-05-20	0.312844	0.63836	0.0151287	-2.98656	0.376787			2009-05-20	0.31775	0.651683	0.017918	-0.48751	3.03549																								6.01618e-06	4.43734e-05	1.94511e-06
445.05	1592.3	2		0.312887	0.653574	0.024442	-4.71191	-0.0407378		2009-05-19	0.308934	0.649098	0.0293623	-5.31557	-0.994897			2009-05-19	0.316841	0.658051	0.0195217	-4.10824	0.913421																								1.56305e-05	2.00384e-05	2.42094e-05
447.05	1600.3	2		0.311342	0.624393	0.0125404	-2.42258	-0.923971		2009-05-15	0.310041	0.620545	0.0112637	-3.24014	-1.73247			2009-05-15	0.312643	0.628241	0.0138171	-1.60502	-0.115469																								1.69312e-06	1.48079e-05	1.62992e-06
449.05	1609.4	2		0.312172	0.652806	0.0247909	-7.03647	-2.26594		2009-05-14	0.311689	0.667621	0.0365719	-7.52832	-1.87351			2009-05-14	0.312655	0.637992	0.0130099	-6.54462	-2.65838																								2.32924e-07	0.000219469	0.000138792
451.05	1618.4	2		0.310389	0.651368	0.0277484	-5.53081	-0.980753		2009-05-15	0.309902	0.649767	0.0293095	-6.27579	-2.19973			2009-05-15	0.310876	0.652969	0.0261872	-4.78582	0.238223																								2.37323e-07	2.56174e-06	2.43722e-06
453.05	1627.3	2		0.302341	0.613118	0.0100314	-2.34779	1.11078		2009-05-19	0.300762	0.613979	0.0146066	-2.26744	1.05478			2009-05-19	0.30392	0.612257	0.00545622	-2.42815	1.16678																								2.49425e-06	7.41045e-07	2.09322e-05
454.95	1636.2	2		0.300494	0.598934	0.00606821	-3.75037	-1.72205		2009-06-15	0.296989	0.595981	0.0106047	-4.42173	-2.51682			2009-06-15	0.303999	0.601887	0.00153174	-3.07901	-0.927286																								1.22863e-05	8.72293e-06	2.05795e-05
457.05	1645.3	2		0.310444	0.609868	0.00106951	-1.45968	-0.260617		2009-06-01	0.310477	0.605702	-0.00216375	-1.59449	-0.612713			2009-06-01	0.310412	0.614034	0.00430278	-1.32486	0.0914781																								1.05408e-09	1.73539e-05	1.0454e-05
459.05	1654.7	2		0.298171	0.618293	0.0232483	-5.7474	-2.20379		2009-06-15	0.294878	0.607224	0.0199413	-6.51272	-3.24298			2009-06-15	0.301463	0.629362	0.0265554	-4.98207	-1.16459																								1.084e-05	0.000122527	1.09368e-05
461.05	1663.2	2		0.302199	0.629392	0.0271701	-2.70932	0.625735		2009-06-18	0.304583	0.636919	0.0285092	-2.71184	0.955474			2009-06-18	0.299816	0.621865	0.025831	-2.7068	0.295997																								5.68014e-06	5.66581e-05	1.79318e-06
463.05	1672	2		0.302784	0.615221	0.0155268	-1.24599	1.25691		2009-06-18	0.302151	0.610919	0.0132604	-1.05496	1.27054			2009-06-18	0.303417	0.619523	0.0177932	-1.43702	1.24327																								4.01e-07	1.85057e-05	5.13656e-06
465.05	1681.7	2		0.292607	0.605044	0.0214945	-6.55499	-3.12488		2009-06-03	0.295543	0.60101	0.0117256	-6.9192	-3.48969											2009-07-09	0.289672	0.609078	0.0312633	-6.19078	-2.76006																8.61715e-06	1.62719e-05	9.54308e-05
466.95	1689	2		0.301011	0.601163	0.0085461	-1.47252	0.241832		2009-06-18	0.300524	0.592396	0.00334674	-1.78761	-0.6435			2009-06-18	0.301498	0.60993	0.0137455	-1.15743	1.12716																								2.37031e-07	7.68634e-05	2.70333e-05
469.05	1699.2	2		0.305548	0.598411	-0.00083538	-2.85253	-1.61827		2009-06-24	0.306198	0.595256	-0.00352677	-4.01463	-3.14535											2009-07-09	0.304898	0.601566	0.00185601	-1.69043	-0.0911895																4.22148e-07	9.95644e-06	7.2436e-06
471.05	1708.4	2		0.306417	0.613761	0.00885929	-3.09146	-0.983858		2009-06-17	0.302091	0.616882	0.014128	-8.26396	-4.67843											2009-07-09	0.310743	0.61064	0.00359057	2.08105	2.71071																1.87138e-05	9.74213e-06	2.77595e-05
473.2	1717.5	2		0.312605	0.632339	0.0153282	-1.29284	0.777598		2009-06-22	0.310205	0.638528	0.0265037	-1.08528	0.921521			2009-06-22	0.315005	0.62615	0.00415276	-1.50041	0.633674																								5.75975e-06	3.83047e-05	0.000124891
475.05	1725.6	2		0.323472	0.644489	0.00340823	-1.06502	1.60399		2009-06-17	0.322647	0.642541	0.00305406	-1.30611	1.37263			2009-06-17	0.324298	0.646438	0.0037624	-0.823931	1.83535																								6.8201e-07	3.79662e-06	1.25437e-07
477.05	1734.8	2		0.305052	0.630532	0.0206477	-6.15325	-2.3108		2009-06-03	0.302951	0.615033	0.0133534	-5.60002	-2.66446			2009-06-03	0.307154	0.646031	0.0279419	-6.70647	-1.95714																								4.41471e-06	0.000240217	5.32064e-05
479.05	1742.9	2		0.312476	0.622278	0.00239761	-3.10383	-0.317237		2009-06-24	0.311076	0.616241	0.000583951	-3.73368	-1.26182			2009-06-24	0.313876	0.628314	0.00421126	-2.47398	0.627345																								1.96054e-06	3.64406e-05	3.28935e-06
481.1	1751.9	2		0.303051	0.632684	0.026857	-5.03876	-1.24179		2009-07-01	0.299724	0.633563	0.0352784	-5.41628	-1.83587			2009-07-01	0.306378	0.631806	0.0184356	-4.66124	-0.647713																								1.10712e-05	7.71515e-07	7.09196e-05
483.05	1760.7	2		0.303255	0.612073	0.011103	-4.35653	-1.72819		2009-06-22	0.303145	0.602249	0.00132061	-4.11851	-1.45508			2009-06-22	0.303366	0.621897	0.0208854	-4.59456	-2.00129																								1.22977e-08	9.65112e-05	9.56957e-05
485.05	1769.4	2		0.304553	0.628666	0.0204336	-2.90449	0.739542		2009-05-27	0.302697	0.625455	0.0236755	-1.72084	1.2864			2009-05-27	0.306409	0.631877	0.0171917	-4.08814	0.192682																								3.44545e-06	1.03082e-05	1.05102e-05
487.05	1778.1	2		0.307633	0.629084	0.0186901	-3.05224	-0.26135		2009-06-10	0.307001	0.61818	0.0128401	-2.92802	-0.97902			2009-06-10	0.308264	0.639989	0.02454	-3.17647	0.456321																								3.98951e-07	0.000118911	3.42221e-05
488.55	1784.9	2		0.312454	0.620229	0.00738657	-0.175485	1.02519		2009-06-04	0.311756	0.61633	0.00421004	-0.0513774	1.28996			2009-06-04	0.313152	0.624128	0.0105631	-0.299592	0.760421																								4.86773e-07	1.52006e-05	1.00904e-05
490.7	1795	3		0.306934	0.622362	0.00912875	-4.45872	-0.718508		2009-05-28	0.308128	0.612821	-0.00431642	-4.81407	-0.725041			2009-05-28	0.307238	0.625487	0.0152509	-1.67589	1.22923			2009-07-09	0.305435	0.628779	0.0164518	-6.8862	-2.65971																1.42651e-06	9.10348e-05	0.000180773
493.05	1804.1	2		0.313672	0.643067	0.0179939	-2.75543	0.651855		2009-06-01	0.310915	0.629785	0.0125793	-2.95347	-0.0832257			2009-06-01	0.31643	0.656348	0.0234085	-2.55738	1.38694																								7.60485e-06	0.000176408	2.93178e-05
495.05	1813.3	2		0.313597	0.628566	0.0107779	-1.34515	0.468637		2009-06-03	0.312987	0.626942	0.0113388	-1.18503	0.408688			2009-06-03	0.314207	0.63019	0.0102169	-1.50527	0.528586																								3.71726e-07	2.6379e-06	3.14703e-07
497.05	1822.6	2		0.310825	0.623459	0.011193	-0.0698232	1.70643		2009-06-05	0.31266	0.619849	0.0054224	-0.643423	0.824502			2009-06-05	0.308991	0.627069	0.0169636	0.503777	2.58836																								3.3642e-06	1.30334e-05	3.32997e-05
499.05	1830.9	2		0.30681	0.623405	0.0148082	-5.06388	-2.28168		2009-06-16	0.30592	0.622498	0.0157792	-5.9379	-3.17099			2009-06-16	0.307699	0.624312	0.0138371	-4.18987	-1.39238																								7.91418e-07	8.22379e-07	9.42919e-07
501.25	1840.2	2		0.313587	0.623879	0.0032934	-2.35207	0.0978298		2009-06-04	0.314204	0.638027	0.0124395	-2.91386	0.37933			2009-06-05	0.31297	0.609732	-0.00585268	-1.79028	-0.183671																								3.80837e-07	0.000200156	8.36507e-05
503.05	1848.3	2		0.308952	0.625861	0.00795453	-3.27733	0.600911		2009-06-03	0.30957	0.634618	0.0149225	-1.84899	2.13382											2009-07-07	0.308334	0.617104	0.000986533	-4.70566	-0.931998																3.81559e-07	7.66798e-05	4.8553e-05
505.05	1856.3	4		0.31997	0.655961	0.026886	0.0557236	1.57769		2009-06-18	0.314529	0.652014	0.0333023	-1.96175	-0.337868			2009-06-18	0.320947	0.659085	0.0239094	-2.03761	0.438074			2009-07-07	0.321383	0.658616	0.0280762	1.77028	2.97737			2009-07-10	0.323023	0.65413	0.0222562	2.45198	3.23319								2.96099e-05	1.55812e-05	4.11687e-05
507.15	1865.3	2		0.298709	0.615915	0.0228697	-3.33428	-0.50108		2009-06-23	0.298304	0.611197	0.0204226	-3.10356	-0.59893			2009-06-23	0.299114	0.620633	0.0253168	-3.565	-0.40323																								1.6389e-07	2.22574e-05	5.9883e-06
509.05	1874.1	3		0.2866	0.590927	0.0219911	-2.50125	0.244867		2009-06-24	0.289141	0.588917	0.0155745	-1.22002	1.37825			2009-06-24	0.28553	0.604592	0.0345054	-3.10826	0.363376			2009-07-10	0.28513	0.57927	0.0158933	-3.17546	-1.00703																6.45464e-06	4.03692e-06	4.1173e-05
510.95	1881.9	2		0.295302	0.561488	-0.0131027	-0.438213	-0.241171		2009-06-26	0.294789	0.535811	-0.0356123	-0.320025	-0.600092			2009-06-26	0.295816	0.587165	0.00940698	-0.5564	0.117751																								2.63889e-07	0.000659287	0.000506684
513.05	1891.5	2		0.307666	0.624153	0.00896611	-5.97191	-2.09459										2009-06-24	0.318565	0.636093	-0.00235697	-4.89334	-0.622303			2009-07-08	0.296767	0.612214	0.0202892	-7.05047	-3.56688
515.06	1900.4	2		0.300151	0.596782	0.00213838	-4.20735	-1.63206		2009-06-05	0.299902	0.592882	7.40591e-05	-4.55278	-2.26872			2009-06-05	0.3004	0.600682	0.00420271	-3.86191	-0.995399																								6.19795e-08	1.52108e-05	4.26144e-06
517.05	1909.4	2		0.298711	0.612792	0.0209184	-1.93275	0.619553		2009-06-15	0.296962	0.61102	0.0218719	-3.05112	-0.325082			2009-06-15	0.30046	0.614563	0.0199649	-0.814376	1.56419																								3.06051e-06	3.1379e-06	9.0914e-07
519.05	1917.6	2		0.309859	0.610564	-0.00274117	-2.96404	-0.49613		2009-06-25	0.312664	0.593596	-0.0160693	-0.493975	-0.0787152			2009-06-25	0.307054	0.627531	0.010587	-5.43411	-0.913545																								7.86898e-06	0.0002879	0.00017764
521.05	1926.7	2		0.307886	0.619656	0.00659525	-2.04358	1.20907		2009-05-29	0.309556	0.61748	0.00146206	-2.55676	0.633036			2009-05-30	0.306216	0.621831	0.0117284	-1.53039	1.7851																								2.7893e-06	4.73411e-06	2.63496e-05
523.28	1935.8	2		0.304643	0.609921	0.00762323	-2.63303	-0.33902		2009-06-23	0.304515	0.599471	0.00169994	-1.47315	-0.13855			2009-06-23	0.304771	0.62037	0.0135465	-3.79291	-0.539489																								1.63938e-08	0.000109195	3.50854e-05
525.05	1944.7	2		0.304814	0.637402	0.0231099	-6.08343	-1.16861		2009-06-26	0.305232	0.63874	0.0233139	-6.59105	-1.59933			2009-06-26	0.304397	0.636065	0.0229059	-5.57581	-0.737882																								1.74499e-07	1.7889e-06	4.16214e-08
527.05	1952.5	2		0.306802	0.630814	0.019245	-2.63874	0.763395		2009-06-03	0.304429	0.630006	0.0230083	-3.24052	0.190624			2009-06-03	0.309176	0.631622	0.0154817	-2.03696	1.33617																								5.63384e-06	6.52388e-07	1.41627e-05
529.05	1962.2	2		0.310712	0.619808	0.00550599	-2.46705	-0.156237		2009-05-27	0.308514	0.620182	0.00930092	-2.98605	-0.470136			2009-05-27	0.31291	0.619433	0.00171106	-1.94804	0.157662																								4.83101e-06	1.40052e-07	1.44015e-05
531.05	1971.3	2		0.315084	0.634865	0.00764199	-1.40273	1.84654		2009-05-30	0.31477	0.62589	0.00166044	-0.967479	1.75192			2009-05-30	0.315399	0.643839	0.0136235	-1.83798	1.94116																								9.89542e-08	8.05454e-05	3.5779e-05
533.05	1980.4	2		0.310178	0.631374	0.0151955	-2.78171	0.178083		2009-06-16	0.309351	0.621996	0.010404	-3.38688	-1.06974			2009-06-16	0.311006	0.640751	0.019987	-2.17654	1.42591																								6.84703e-07	8.79375e-05	2.29589e-05
535.05	1988.8	2		0.312088	0.628039	0.00953584	-4.95742	-2.27732		2009-05-28	0.313455	0.634186	0.0118904	-5.31477	-2.38522			2009-05-28	0.31072	0.621892	0.00718126	-4.60007	-2.16942																								1.87026e-06	3.77883e-05	5.54406e-06
537.05	1997.2	2		0.309643	0.636493	0.0204476	-3.83343	-0.65526		2009-05-29	0.310233	0.630559	0.0169062	-3.24187	-0.85465			2009-05-29	0.309054	0.642427	0.0239889	-4.42499	-0.45587																								3.47543e-07	3.52124e-05	1.25411e-05
539.05	2006.9	2		0.308991	0.628023	0.0143732	-3.19328	-0.270675		2009-05-30	0.309789	0.623383	0.0102174	-1.64765	0.799408			2009-05-30	0.308193	0.632662	0.018529	-4.73891	-1.34076																								6.36687e-07	2.15246e-05	1.72706e-05
541.05	2015.7	2		0.316049	0.62259	-0.0016295	-2.73488	-0.543382		2009-06-10	0.318462	0.623067	-0.00288206	-2.78337	-1.25355			2009-06-10	0.313636	0.622113	-0.000376948	-2.68639	0.16679																								5.82241e-06	2.27226e-07	1.5689e-06
543.05	2023.3	2		0.314086	0.63046	0.00874028	-3.77213	-1.26645		2009-06-11	0.312182	0.623271	0.00708907	-4.28227	-2.1647			2009-06-11	0.315991	0.637649	0.0103915	-3.26198	-0.368201																								3.62685e-06	5.16804e-05	2.72648e-06
545.05	2032	2		0.306875	0.620937	0.0140356	-2.42191	-0.0824316		2009-06-01	0.30335	0.622131	0.0210103	-3.65233	-1.0428			2009-06-01	0.3104	0.619743	0.00706099	-1.19149	0.877938																								1.24228e-05	1.42528e-06	4.86455e-05
547.32	2042.6	2		0.313532	0.631043	0.00793518	-1.78229	1.2378		2009-06-08	0.315047	0.630698	0.00589493	-1.14508	1.5835			2009-06-08	0.312018	0.631389	0.00997543	-2.4195	0.892098																								2.29371e-06	1.19356e-07	4.16261e-06
549.05	2049.8	2		0.313704	0.607607	-0.00763444	-0.643357	0.552614		2009-06-25	0.311689	0.60082	-0.0113363	-1.49137	-0.0906536			2009-06-25	0.315718	0.614395	-0.00393262	0.204659	1.19588																								4.05876e-06	4.60697e-05	1.37035e-05
550.95	2058.1	2		0.307809	0.622331	0.0120527	-2.60044	0.0816245		2009-06-11	0.310393	0.62649	0.00892736	-2.7497	0.42183			2009-06-11	0.305226	0.618172	0.0151781	-2.45117	-0.258581																								6.67457e-06	1.73004e-05	9.76791e-06
553.2	2068.5	2		0.304821	0.612914	0.0090506	-4.41128	-1.82157		2009-07-01	0.305372	0.61098	0.00578071	-4.59029	-1.94196			2009-07-01	0.304269	0.614848	0.0123205	-4.23227	-1.70118																								3.0405e-07	3.73916e-06	1.06922e-05
555.05	2076.8	3		0.301303	0.598205	0.00854013	-0.506934	0.415998										2009-06-04	0.304276	0.598421	0.000233048	-1.61169	-0.0796817			2009-07-08	0.293474	0.595174	0.0259712	0.811709	0.593387			2009-07-10	0.306161	0.60102	-0.000583797	-0.720821	0.734288
557.05	2085.3	2		0.306141	0.634636	0.0237267	-5.79869	-2.20682		2009-06-16	0.306116	0.625671	0.0187471	-5.50611	-2.78566			2009-06-16	0.306166	0.643601	0.0287062	-6.09127	-1.62799																								6.14595e-10	8.03699e-05	2.47962e-05
559.05	2093.8	2		0.314717	0.620139	0.00150352	-1.28637	0.228939		2009-06-08	0.313704	0.621876	0.00724019	-0.458549	0.600768			2009-06-08	0.315729	0.618402	-0.00423315	-2.11418	-0.142891																								1.02504e-06	3.01579e-06	3.29094e-05
561.45	2103.4	2		0.31748	0.632453	0.0033135	-3.59076	-0.921145		2009-06-10	0.316295	0.625318	-0.00111848	-4.57008	-1.96802			2009-06-10	0.318664	0.639587	0.00774548	-2.61144	0.125729																								1.40373e-06	5.08971e-05	1.96424e-05
563.05	2110.6	2		0.313248	0.61204	-0.00396272	-1.69161	-0.114705		2009-06-08	0.313846	0.603956	-0.0139274	-3.54113	-1.77998			2009-06-09	0.31265	0.620125	0.00600194	0.157901	1.55057																								3.57516e-07	6.53638e-05	9.92945e-05
564.45	2115.6	2		0.307975	0.624597	0.0130327	-1.85778	1.02395		2009-06-01	0.30614	0.630329	0.0215885	-2.55646	0.50786			2009-06-01	0.309811	0.618865	0.00447694	-1.1591	1.54003																								3.36869e-06	3.28557e-05	7.32016e-05
567.05	2128.3	2		0.309708	0.615237	-0.00169695	-3.59114	-0.249346		2009-06-16	0.306513	0.618323	0.0065749	-4.79178	-1.19162			2009-06-16	0.312904	0.61215	-0.00996879	-2.3905	0.692931																								1.02103e-05	9.52661e-06	6.84234e-05
569.05	2136.9	2		0.315199	0.621794	-0.00441469	-1.89184	1.09219		2009-06-10	0.312684	0.62	-0.00237539	-1.9937	1.23509			2009-06-10	0.317713	0.623587	-0.00645399	-1.78999	0.949285																								6.32379e-06	3.21752e-06	4.15873e-06
571.05	2144.8	2		0.310095	0.621097	0.00528189	-3.67574	-0.746032		2009-06-08	0.309566	0.618239	0.00482815	-3.9	-1.26749			2009-06-08	0.310623	0.623954	0.00573563	-3.45149	-0.224576																								2.79379e-07	8.16283e-06	2.05883e-07
573.05	2153.8	2		0.306845	0.613125	0.00456564	-3.47467	-0.740865		2009-06-15	0.307298	0.603974	-0.00266022	-2.85274	-0.748297			2009-06-15	0.306392	0.622276	0.0117915	-4.0966	-0.733432																								2.05116e-07	8.37372e-05	5.22129e-05
575.05	2162	2		0.312821	0.625792	0.00206981	-2.40815	1.06461		2009-05-27	0.31233	0.630754	0.00857235	-2.53603	0.811401			2009-05-27	0.313311	0.62083	-0.00443272	-2.28027	1.31782																								2.40261e-07	2.4621e-05	4.2283e-05
626.21	2381.1	2		0.314155	0.605717	-0.0148824	-2.15313	0.0509541		2013-07-07	0.31662	0.609674	-0.0152459	-1.21616	0.859049			2013-07-08	0.31169	0.601759	-0.0145188	-3.0901	-0.757141																								6.077e-06	1.56617e-05	1.32189e-07
628.12	2389.2	2		0.314035	0.605825	-0.0102571	-2.37824	-1.11328		2011-05-17	0.308681	0.596981	-0.00541554	-2.45402	-1.88656			2011-05-17	0.319389	0.614669	-0.0150987	-2.30245	-0.340001																								2.86665e-05	7.82077e-05	2.34409e-05
634.11	2415.5	2		0.310188	0.601442	-0.00889921	-0.546609	1.08883		2011-05-24	0.308609	0.600025	-0.00632191	-0.703458	0.737571			2011-05-24	0.311766	0.602858	-0.0114765	-0.38976	1.44008																								2.49247e-06	2.0061e-06	6.64247e-06
648.02	2476.7	2		0.309658	0.618262	-3.71897e-05	-2.9879	0.666971		2011-05-16	0.308049	0.627883	0.0112785	-3.63433	0.353293			2011-05-16	0.311267	0.60864	-0.0113529	-2.34148	0.980649																								2.58943e-06	9.25766e-05	0.000128045
683.9	2634.8	2		0.305975	0.599157	-0.00856079	-4.47021	-1.5299		2011-05-17	0.30291	0.594743	-0.0064766	-5.72338	-2.86923			2011-05-18	0.30904	0.603571	-0.010645	-3.21704	-0.190565																								9.39505e-06	1.94813e-05	4.34386e-06
687.85	2652.4	2		0.304027	0.602042	-0.00527512	-3.44913	0.229248		2011-05-17	0.305736	0.606202	-0.00455508	-3.2448	0.44897			2011-05-17	0.302318	0.597882	-0.00599517	-3.65347	0.00952651																								2.92059e-06	1.73033e-05	5.18467e-07
695.58	2688.5	2		0.304083	0.597675	-0.00775094	-5.79998	-2.5256		2011-05-20	0.301216	0.592327	-0.00538283	-6.31871	-3.496			2011-05-20	0.30695	0.603024	-0.0101191	-5.28125	-1.55521																								8.219e-06	2.8607e-05	5.60796e-06
702.16	2719.4	2		0.301541	0.567754	-0.0306423	-3.23022	-0.445082		2016-05-19	0.300278	0.570292	-0.0268791	-3.2996	-0.236829			2016-05-19	0.302805	0.565216	-0.0344056	-3.16085	-0.653334																								1.5967e-06	6.4423e-06	1.41618e-05
709.07	2751.1	2		0.298528	0.587292	-0.00770039	-3.22568	0.112651		2011-05-20	0.298484	0.584619	-0.00996167	-3.27696	-0.00955033			2011-05-20	0.298572	0.589966	-0.00543911	-3.17441	0.234853																								1.93707e-09	7.14727e-06	5.1134e-06
713.04	2770.3	2		0.307833	0.577655	-0.0287103	-2.01744	-0.216487		2013-07-07	0.306096	0.574738	-0.0269728	-1.66888	-0.147575			2013-07-07	0.30957	0.580573	-0.0304478	-2.36601	-0.285398																								3.01591e-06	8.51181e-06	3.01902e-06
717.08	2789.7	2		0.306619	0.585174	-0.0187194	-1.8381	-0.0596246		2011-05-16	0.305543	0.587558	-0.0148974	-3.32364	-1.373			2011-05-16	0.307696	0.582789	-0.0225413	-0.352558	1.25375																								1.15942e-06	5.6867e-06	1.46074e-05
721.1	2808.2	2		0.314406	0.597456	-0.0264368	-2.83598	-0.00447157		2011-05-24	0.316159	0.596596	-0.0316017	-4.56443	-1.51585			2011-05-24	0.312653	0.598316	-0.0212718	-1.10752	1.50691																								3.07251e-06	7.39338e-07	2.66769e-05
737.15	2884.5	2		0.307312	0.588479	-0.0215624	-5.08536	-2.20167		2011-05-18	0.303688	0.584739	-0.0158436	-5.2681	-2.89772			2011-05-18	0.310935	0.592219	-0.0272812	-4.90261	-1.50561																								1.3132e-05	1.39891e-05	3.27047e-05
741.09	2903.8	2		0.304115	0.572334	-0.0310113	-4.18066	-1.40357		2011-05-12	0.305097	0.579867	-0.0244455	-4.3218	-1.75417			2011-05-13	0.303133	0.564801	-0.0375771	-4.03952	-1.05297																								9.64555e-07	5.67442e-05	4.31099e-05
749.44	2943.6	2		0.307253	0.583008	-0.0302797	-3.49866	0.100408		2011-05-13	0.307817	0.579278	-0.0337878	-3.52949	-0.22243			2011-05-13	0.30669	0.586738	-0.0267717	-3.46782	0.423247																								3.17578e-07	1.39119e-05	1.23064e-05
773.14	3058	2		0.311276	0.574288	-0.0396435	-2.47772	-0.492206		2011-05-11	0.311667	0.56339	-0.0479117	-2.87047	-1.62663			2011-05-11	0.310886	0.585186	-0.0313752	-2.08498	0.642219																								1.52318e-07	0.000118766	6.83635e-05
779.03	3086	2		0.303981	0.571411	-0.037692	-4.19766	-0.0943022		2011-05-05	0.304264	0.574148	-0.0357492	-4.44919	-0.289672			2011-05-05	0.303697	0.568675	-0.0396347	-3.94613	0.101068																								8.0292e-08	7.48766e-06	3.77427e-06
784.07	3110.4	2		0.305413	0.556731	-0.0487701	-3.04695	-0.373901		2011-05-03	0.305155	0.553602	-0.0494474	-2.58745	-0.350036			2011-05-03	0.305671	0.559861	-0.0480927	-3.50646	-0.397767																								6.64021e-08	9.79165e-06	4.58788e-07
789.32	3134.8	2		0.31233	0.566176	-0.0516297	-4.24388	-1.83323		2011-05-20	0.310799	0.563656	-0.0484459	-3.83456	-2.02438			2011-05-20	0.313861	0.568697	-0.0548136	-4.6532	-1.64207																								2.34432e-06	6.35217e-06	1.01368e-05
792.816	3150.8	2		0.311231	0.561319	-0.0580179	-4.26398	-1.04073		2013-07-10	0.308336	0.54676	-0.0650764	-3.39676	-0.586845			2013-07-10	0.314126	0.575878	-0.0509593	-5.13119	-1.49461																								8.38205e-06	0.000211955	4.98235e-05
801.63	3192.8	2		0.304356	0.557704	-0.0445367	-0.946741	1.43257		2011-05-11	0.302142	0.558293	-0.0400363	-1.83997	0.648993			2011-05-11	0.306569	0.557115	-0.0490372	-0.0535151	2.21615																								4.89973e-06	3.47183e-07	2.02541e-05
805.5	3211.5	2		0.308796	0.543125	-0.0616156	-0.310872	0.68961		2011-05-09	0.307908	0.537235	-0.0631845	-0.232181	0.199337			2011-05-10	0.309683	0.549015	-0.0600467	-0.389563	1.17988																								7.877e-07	3.46893e-05	2.46151e-06
809.24	3228.6	2		0.30779	0.558585	-0.0518189	-4.64974	-1.89995		2011-05-10	0.305643	0.55294	-0.0524305	-5.4613	-2.8791			2011-05-10	0.309938	0.564231	-0.0512072	-3.83818	-0.9208																								4.61046e-06	3.18764e-05	3.74117e-07
813.94	3250.7	2		0.314814	0.578893	-0.0447955	-2.24645	0.354417		2011-05-18	0.317521	0.591477	-0.037559	-1.74648	0.853648			2011-05-18	0.312107	0.566309	-0.052032	-2.74643	-0.144813																								7.32991e-06	0.00015836	5.23668e-05
815.88	3259.6	2		0.319534	0.547363	-0.0798781	-0.277545	1.03418		2016-06-29	0.318153	0.54242	-0.0806729	-1.13008	-0.121146			2016-06-29	0.320916	0.552306	-0.0790834	0.574994	2.18951																								1.9092e-06	2.44329e-05	6.31593e-07
817.51	3268.6	2		0.311821	0.582342	-0.0363923	-3.29593	-0.475384		2011-05-12	0.310893	0.581777	-0.0363688	-4.38962	-1.28055			2011-05-12	0.312749	0.582908	-0.0364159	-2.20225	0.329785																								8.61347e-07	3.20047e-07	5.54941e-10
821.31	3285.6	2		0.318898	0.563395	-0.0630626	0.0451626	1.45443		2011-04-22	0.318182	0.564371	-0.061634	-0.229417	1.39436			2011-04-22	0.319615	0.562418	-0.0644912	0.319742	1.51451																								5.13313e-07	9.53822e-07	2.04089e-06
826.04	3308.9	2		0.305277	0.544957	-0.0589391	-3.78626	-1.39622		2011-04-26	0.303463	0.54602	-0.0559774	-3.91926	-1.16111			2011-04-26	0.307091	0.543895	-0.0619008	-3.65325	-1.63133																								3.29023e-06	1.12921e-06	8.77156e-06
829.48	3324.2	2		0.300088	0.537437	-0.0587222	-2.97847	-0.0613652		2011-05-04	0.300533	0.530285	-0.0670948	-3.00118	-0.00744822			2011-05-04	0.299643	0.54459	-0.0503496	-2.95576	-0.115282																								1.97978e-07	5.11598e-05	7.01005e-05
833.47	3344.3	2		0.304019	0.534862	-0.0606038	-1.95668	-0.907553		2011-05-11	0.302958	0.523549	-0.0678574	-3.06465	-2.43346			2011-05-11	0.30508	0.546175	-0.0533503	-0.848717	0.618359																								1.12562e-06	0.000127984	5.2614e-05
837.32	3361.7	2		0.30637	0.5544	-0.0512769	-3.14569	-0.846442		2011-04-22	0.305848	0.548498	-0.0531652	-2.43072	-0.800715			2011-04-22	0.306893	0.560302	-0.0493887	-3.86065	-0.89217																								2.7264e-07	3.48344e-05	3.56533e-06
842.07	3385	1		0.312845	0.573094	-0.0532119	-2.83961	1.19809		2011-05-04	0.312845	0.573094	-0.0532119	-2.83961	1.19809
845.58	3401.8	2		0.31155	0.548907	-0.0653776	-0.443839	1.4693		2011-05-10	0.308802	0.546936	-0.0621675	-0.300211	1.65822			2011-05-10	0.314299	0.550877	-0.0685877	-0.587467	1.28038																								7.55443e-06	3.88297e-06	1.03045e-05
849.41	3419.2	2		0.311841	0.536428	-0.0761151	-1.7508	-0.326356		2011-05-05	0.312784	0.535574	-0.0796872	-2.09545	-0.474812			2011-05-05	0.310898	0.537282	-0.072543	-1.40615	-0.1779																								8.89583e-07	7.28723e-07	1.27597e-05
854.39	3443.4	2		0.301758	0.538956	-0.0600969	-3.68716	-0.843972		2011-05-09	0.300615	0.546096	-0.0506472	-3.89139	-1.05944			2011-05-09	0.302901	0.531815	-0.0695467	-3.48292	-0.628501																								1.3064e-06	5.09821e-05	8.92977e-05
858.02	3460.7	2		0.312093	0.552107	-0.0682764	-2.54276	0.511504		2011-04-21	0.312264	0.558845	-0.0643245	-3.96268	-0.346841			2011-04-21	0.311921	0.545369	-0.0722283	-1.12284	1.36985																								2.93771e-08	4.54049e-05	1.56175e-05
861.93	3479	2		0.301617	0.533237	-0.0664668	-4.41319	-1.35456		2011-05-23	0.299986	0.533119	-0.0634793	-4.89526	-1.80753			2011-05-23	0.303249	0.533355	-0.0694544	-3.93111	-0.901598																								2.66264e-06	1.39479e-08	8.92563e-06
865.52	3496.3	2		0.311632	0.547036	-0.0672103	-2.58928	-0.686396		2011-05-23	0.308046	0.54953	-0.0564894	-2.78787	-1.14323			2011-05-23	0.315218	0.544543	-0.0779313	-2.39069	-0.22956																								1.28582e-05	6.21869e-06	0.000114938
869.38	3514.5	2		0.304733	0.539657	-0.0641773	-2.3966	0.193336		2011-05-04	0.302881	0.532071	-0.0667597	-3.31835	-1.01559			2011-05-05	0.306584	0.547243	-0.061595	-1.47485	1.40227																								3.42641e-06	5.75478e-05	6.66834e-06
872.93	3531.4	2		0.31746	0.559429	-0.0736489	-2.61412	0.91588		2011-04-21	0.317873	0.564285	-0.0702707	-3.32505	0.363202			2011-04-21	0.317048	0.554572	-0.0770271	-1.90319	1.46856																								1.70204e-07	2.35866e-05	1.14122e-05
873.59	3534.3	2		0.323026	0.558864	-0.0791597	-2.36111	-0.151945		2011-05-06	0.324251	0.560212	-0.0812664	-3.6088	-1.14936			2011-05-06	0.321801	0.557517	-0.0770529	-1.11342	0.845471																								1.50132e-06	1.81527e-06	4.43833e-06
881.65	3571.9	2		0.308538	0.541809	-0.0727003	-4.3415	-1.01594		2011-04-25	0.306129	0.542274	-0.067478	-4.05466	-0.739605			2011-04-25	0.310948	0.541345	-0.0779227	-4.62834	-1.29227																								5.80407e-06	2.16011e-07	2.72729e-05
886.01	3593.1	2		0.316505	0.557579	-0.0698708	-1.5532	1.13423		2011-04-26	0.31647	0.558337	-0.0714474	-2.72193	0.512831			2011-04-26	0.31654	0.556821	-0.0682942	-0.384471	1.75563																								1.21506e-09	5.7444e-07	2.48565e-06
889.41	3609.9	2		0.309348	0.543904	-0.0682823	-1.86312	0.56218		2011-04-27	0.307674	0.535987	-0.0684291	-1.47824	-0.0460282			2011-04-27	0.311022	0.551821	-0.0681355	-2.24801	1.17039																								2.80344e-06	6.26783e-05	2.15586e-08
893.49	3628.6	2		0.312345	0.542814	-0.076875	-1.25499	1.5172		2011-05-03	0.314498	0.544727	-0.0787837	-1.23016	1.45246			2011-05-04	0.310193	0.540902	-0.0749663	-1.27982	1.58195																								4.63288e-06	3.65671e-06	3.64325e-06
896.512	3643.3	2		0.318376	0.523466	-0.101618	-1.02483	0.324135		2013-07-09	0.318954	0.527714	-0.0991794	-1.89296	-0.381775			2013-07-09	0.317799	0.519218	-0.104056	-0.1567	1.03005																								3.33556e-07	1.80417e-05	5.94544e-06
961.966	3960.8	2		0.307687	0.482178	-0.125913	-1.29749	0.935419		2013-07-04	0.30593	0.480987	-0.123145	-2.40141	-0.263578			2013-07-04	0.309444	0.48337	-0.128681	-0.193571	2.13441																								3.08735e-06	1.41987e-06	7.66242e-06
1038.47	4349.8	2		0.306719	0.434417	-0.172264	-1.4393	0.903786		2013-07-03	0.31096	0.441764	-0.175703	-0.285973	2.58086			2013-07-03	0.302478	0.42707	-0.168824	-2.59263	-0.773291																								1.7984e-05	5.39762e-05	1.18299e-05
1113.66	4755.6	2		0.31399	0.395432	-0.222916	3.98246	5.66682		2013-07-04	0.313445	0.387259	-0.231009	4.48865	6.38299			2013-07-04	0.314535	0.403606	-0.214823	3.47627	4.95065																								2.9713e-07	6.68126e-05	6.54975e-05
1120.67	4794.4	3		0.317404	0.424406	-0.212911	-4.60406	-0.0853136		2016-05-17	0.316313	0.408551	-0.22496	0.126754	4.20559			2016-05-17	0.317294	0.43617	-0.201081	-5.26582	-0.703497			2016-06-30	0.318606	0.428496	-0.212692	-8.67311	-3.75803																1.19047e-06	0.000251373	0.000145186
1186.05	5152.3	2		0.31242	0.379035	-0.251794	1.01204	6.16943		2013-07-04	0.315532	0.386198	-0.248031	-8.68521	-3.97358			2013-07-05	0.309309	0.371871	-0.255558	10.7093	16.3124																								9.6842e-06	5.13112e-05	1.41627e-05
1252.9	5531.3	2		0.314362	0.361156	-0.27802	-0.43918	5.73945		2013-07-06	0.314865	0.362086	-0.277953	-0.72339	5.43236			2013-07-07	0.31386	0.360226	-0.278088	-0.154969	6.04655																								2.5258e-07	8.65601e-07	4.57609e-09
1300.57	5821.2	3		0.316562	0.285405	-0.326789	10.6872	9.80004		2016-05-16	0.315227	0.293731	-0.309839	5.87073	3.73641			2016-05-16	0.316681	0.267049	-0.340298	23.9349	21.7225			2016-06-30	0.317778	0.295437	-0.33023	2.25612	3.94121																1.78136e-06	6.93147e-05	0.000287309
1315.05	5915	2		0.297843	0.310006	-0.2972	5.88803	12.0698		2013-07-03	0.29863	0.300185	-0.307948	-11.5385	-5.22122			2013-07-03	0.297057	0.319827	-0.286451	23.3146	29.3609																								6.18742e-07	9.64486e-05	0.000115526
1371.79	6285.4	4		0.314437	0.311714	-0.318328	1.31688	5.42454		2016-05-18	0.317436	0.333748	-0.318434	-5.39852	2.392			2016-05-18	0.316551	0.287159	-0.329873	3.69403	3.98582			2016-07-06	0.310722	0.309106	-0.317661	0.459412	5.46508			2016-07-07	0.313037	0.316842	-0.307346	6.51258	9.85527								8.99663e-06	0.000485498	1.10728e-08
1379.96	6339.9	2		0.308645	0.282425	-0.318746	14.3416	14.393		2013-07-09	0.308043	0.292982	-0.328096	10.535	15.2893			2013-07-09	0.309247	0.271869	-0.309396	18.1483	13.4967																								3.62105e-07	0.000111444	8.74271e-05
1437.9	6721.2	2		0.313407	0.352802	-0.289098	2.93618	10.0748		2013-07-03	0.3115	0.33787	-0.297662	1.16057	7.74925			2013-07-04	0.315315	0.367735	-0.280534	4.71178	12.4003																								3.63985e-06	0.000222985	7.33424e-05
1491.82	7101.9	2		0.30191	0.319969	-0.282218	-0.090123	3.32162		2013-07-09	0.301416	0.301575	-0.290205	-10.7324	-9.23304			2013-07-09	0.302404	0.338363	-0.274231	10.5522	15.8763																								2.43967e-07	0.000338334	6.37902e-05
1510.28	7243.7	2		0.314485	0.313281	-0.304866	1.05578	2.5275																		2016-06-30	0.314995	0.32947	-0.296036	-3.52591	-0.583078			2016-07-07	0.313974	0.297092	-0.313696	5.63747	5.63808
1516.09	7290.4	3		0.300791	0.321268	-0.279157	-0.754704	2.76325		2011-04-01	0.30312	0.335746	-0.26395	-1.6443	0.719945			2011-04-01	0.296891	0.31943	-0.281699	-0.931644	4.43019			2011-04-20	0.302362	0.308627	-0.291824	0.31183	3.1396																5.42481e-06	0.000209626	0.000231276
1517.84	7304.5	2		0.300034	0.350225	-0.264666	-6.51715	0.603178		2011-04-07	0.299916	0.360875	-0.271092	-6.69984	4.23404			2011-04-07	0.300151	0.339575	-0.258241	-6.33446	-3.02769																								1.37963e-08	0.000113418	4.1284e-05
1520.13	7322.1	2		0.300755	0.335266	-0.268303	-2.44477	1.80727		2011-04-13	0.302274	0.322351	-0.279684	-3.54676	-0.27222			2011-04-13	0.299236	0.348181	-0.256922	-1.34277	3.88677																								2.30831e-06	0.000166797	0.000129525
1521.84	7335.7	2		0.299105	0.299899	-0.287368	2.74959	4.04436		2011-04-08	0.299537	0.304185	-0.282559	4.50326	5.46862			2011-04-08	0.298673	0.295613	-0.292177	0.995927	2.6201																								1.86972e-07	1.83705e-05	2.31269e-05
1523.84	7351.1	2		0.303433	0.329115	-0.2876	1.8522	7.77412		2011-04-05	0.302241	0.326648	-0.287252	0.918745	6.75105			2011-04-05	0.304625	0.331581	-0.287947	2.78566	8.79718																								1.42195e-06	6.08344e-06	1.20907e-07
1525.85	7367.4	2		0.301673	0.34741	-0.259316	-0.594184	3.92715		2011-04-01	0.300717	0.346655	-0.247945	-4.13943	-1.81965			2011-04-01	0.302629	0.348165	-0.270687	2.95106	9.67396																								9.14263e-07	5.6971e-07	0.000129306
1530.05	7400.8	2		0.303391	0.311939	-0.279053	-1.58152	-1.25218		2011-04-14	0.303836	0.33389	-0.268587	5.35628	7.91419			2011-04-14	0.302946	0.289987	-0.289519	-8.51932	-10.4185																								1.98282e-07	0.000481864	0.000109535
1541.88	7493.1	2		0.305428	0.313749	-0.297177	-4.54365	-0.65959		2013-07-08	0.305967	0.300599	-0.304251	-5.60493	-3.27513			2013-07-08	0.30489	0.326898	-0.290103	-3.48238	1.95594																								2.8992e-07	0.00017292	5.0036e-05
1545.88	7524.7	3		0.30789	0.3233	-0.280875	-3.37274	-2.05763		2011-03-29	0.306504	0.321254	-0.278107	-3.60843	-2.75042			2011-03-29	0.308512	0.316645	-0.277257	-7.21782	-8.37394			2011-04-19	0.308654	0.332002	-0.287261	0.708035	4.95148																1.92205e-06	4.1876e-06	7.66267e-06
1547.88	7539.7	3		0.302225	0.312093	-0.280299	3.93544	4.99115		2011-04-03	0.303459	0.303679	-0.287928	1.9311	2.31198			2011-04-03	0.30297	0.31045	-0.274272	4.48466	3.521			2011-04-19	0.300248	0.322151	-0.278696	5.39057	9.14048																1.5209e-06	7.08021e-05	5.82078e-05
1549.89	7556.2	2		0.297649	0.35572	-0.253372	-2.56622	4.24658		2011-04-11	0.296883	0.357545	-0.252725	-2.48373	4.91849			2011-04-12	0.298415	0.353895	-0.254018	-2.64871	3.57467																								5.86867e-07	3.33048e-06	4.17937e-07
1552.67	7578.9	3		0.302443	0.341428	-0.266872	-4.6009	-0.00359362		2011-04-14	0.299917	0.331135	-0.270254	-1.1405	2.97352			2011-04-14	0.3064	0.347572	-0.27445	-1.02036	4.83236			2011-04-18	0.301014	0.345576	-0.255912	-11.6418	-7.81666																6.38443e-06	0.000105937	1.14348e-05
1553.89	7587	2		0.304029	0.371455	-0.256557	-14.4064	-6.00097		2011-03-30	0.30247	0.384043	-0.251341	-9.99815	0.635541			2011-03-30	0.305587	0.358867	-0.261774	-18.8146	-12.6375																								2.42828e-06	0.000158452	2.72099e-05
1557.9	7620	3		0.296737	0.354767	-0.242969	-4.10795	0.622816		2011-04-07	0.296236	0.376615	-0.233522	-1.23701	6.39618			2011-04-07	0.301913	0.349449	-0.249259	-7.79795	-5.03382			2011-04-19	0.292061	0.338237	-0.246126	-3.28889	0.506085																2.50477e-07	0.000477343	8.92441e-05
1560.12	7638.1	2		0.302038	0.361647	-0.254204	-2.42691	3.9743		2011-04-12	0.302326	0.363376	-0.265784	-1.7022	7.49394			2011-04-12	0.301751	0.359918	-0.242623	-3.15162	0.454669																								8.28391e-08	2.98932e-06	0.000134097
1561.9	7651.7	2		0.303623	0.350928	-0.25462	-8.50394	-4.96184		2011-03-31	0.304206	0.35255	-0.245401	-12.8338	-11.149			2011-03-31	0.303041	0.349307	-0.263838	-4.17404	1.22528																								3.39331e-07	2.63023e-06	8.49818e-05
1563.9	7666.6	2		0.289481	0.349545	-0.245532	-0.276118	6.94608		2011-04-05	0.289858	0.344361	-0.247362	-3.57222	2.79989			2011-04-05	0.289105	0.354729	-0.243702	3.01999	11.0923																								1.42007e-07	2.68704e-05	3.3487e-06
1565.9	7683.6	2		0.292827	0.31566	-0.246539	0.090567	-1.37908		2011-03-30	0.292357	0.323947	-0.24123	0.828431	0.206325			2011-03-30	0.293298	0.307374	-0.251849	-0.647297	-2.96448																								2.21395e-07	6.86689e-05	2.81894e-05
1567.9	7699.6	3		0.290615	0.329839	-0.248283	1.1178	4.09455		2011-04-04	0.28856	0.339389	-0.24582	1.67438	7.09163			2011-04-04	0.294019	0.324265	-0.255145	1.17764	2.96564			2011-04-20	0.289267	0.325863	-0.243884	0.501381	2.22638																4.22483e-06	9.11988e-05	6.06609e-06
1569.9	7715.5	2		0.303834	0.341791	-0.257115	2.83682	4.64849		2011-04-03	0.305313	0.348892	-0.261369	3.86363	7.52014			2011-04-03	0.302355	0.334691	-0.252861	1.81001	1.77684																								2.18749e-06	5.04184e-05	1.80959e-05
1571.9	7731.4	2		0.293079	0.357533	-0.229504	-8.08396	-4.06583		2011-04-11	0.292642	0.348368	-0.231853	-9.85213	-7.11878			2011-04-11	0.293515	0.366698	-0.227155	-6.31579	-1.01288																								1.9036e-07	8.39981e-05	5.51686e-06
1572.4	7735.5	2		0.297965	0.288335	-0.280536	0.265779	-1.95875		2016-05-13	0.296261	0.300466	-0.267288	5.84803	4.02752			2016-05-13	0.29967	0.276204	-0.293784	-5.31647	-7.94502																								2.90555e-06	0.000147161	0.000175514
1573.91	7747.6	2		0.295987	0.344847	-0.240117	-3.30511	-1.07513		2011-04-05	0.297098	0.342526	-0.24703	-5.77739	-2.97801			2011-04-06	0.294876	0.347168	-0.233205	-0.832837	0.827757																								1.23364e-06	5.38691e-06	4.77848e-05
1575.84	7762.4	2		0.304228	0.347155	-0.258927	7.65348	10.8002		2011-03-30	0.302413	0.355339	-0.263742	11.1686	17.9074			2011-03-30	0.306042	0.338971	-0.254112	4.13836	3.69303																								3.29197e-06	6.69773e-05	2.31848e-05
1577.92	7780.1	2		0.30526	0.391571	-0.225509	-7.75908	-2.39682		2011-04-02	0.304208	0.384872	-0.2253	-9.44575	-5.12368			2011-04-02	0.306311	0.398269	-0.225717	-6.07241	0.330035																								1.10498e-06	4.48715e-05	4.34219e-08
1579.92	7795.9	3		0.308905	0.363231	-0.255601	1.4116	5.44073		2011-04-06	0.305754	0.361889	-0.260202	1.01388	7.12918			2011-04-06	0.313057	0.360119	-0.261404	1.54017	4.36483			2011-04-19	0.307904	0.367684	-0.245196	1.68074	4.82818																9.92859e-06	1.79991e-06	2.11681e-05
1581.92	7812.1	2		0.292243	0.357051	-0.230069	2.49715	6.72996		2011-04-12	0.290869	0.342126	-0.236117	0.0320225	2.94257			2011-04-12	0.293618	0.371977	-0.22402	4.96228	10.5174																								1.8887e-06	0.000222777	3.65819e-05
1583.92	7828.5	2		0.297344	0.35333	-0.236811	-5.59649	-2.77753		2011-04-15	0.29633	0.349288	-0.233923	-5.49858	-3.76854			2011-04-15	0.298358	0.357372	-0.239699	-5.6944	-1.78653																								1.02901e-06	1.63372e-05	8.34015e-06
1585.92	7845.1	2		0.292728	0.357452	-0.230644	-6.52258	-2.14401		2011-04-07	0.294127	0.353228	-0.241143	-6.14196	-0.992374			2011-04-07	0.291329	0.361676	-0.220144	-6.9032	-3.29565																								1.95783e-06	1.78424e-05	0.000110241
1587.94	7861.1	2		0.303695	0.351416	-0.251885	0.758983	3.63099		2011-04-02	0.304569	0.349438	-0.254845	-2.50793	0.25337			2011-04-02	0.302821	0.353394	-0.248925	4.02589	7.0086																								7.63876e-07	3.91314e-06	8.76393e-06
1589.92	7878.4	2		0.290859	0.350944	-0.239947	-5.37965	0.40499		2011-03-18	0.289829	0.362671	-0.226776	-1.91557	3.94218			2011-03-18	0.291888	0.339216	-0.253119	-8.84373	-3.1322																								1.05973e-06	0.000137539	0.000173499
1592.15	7895.8	2		0.295923	0.340597	-0.250329	-4.36574	-0.778922		2011-03-15	0.295019	0.355765	-0.242208	-0.574385	4.89622			2011-03-15	0.29242	0.332852	-0.249978	-5.53924	-2.20231			2013-07-10	0.30033	0.333173	-0.258801	-6.9836	-5.03068																8.18035e-07	0.000230069	6.59476e-05
1593.92	7910.5	3		0.290661	0.342555	-0.240167	-2.84278	1.18869		2011-03-08	0.286291	0.345962	-0.240728	-6.35964	0.489831			2011-03-08	0.292623	0.354206	-0.228898	1.46167	4.66216			2011-03-22	0.29307	0.327495	-0.250875	-3.63036	-1.58593																1.90991e-05	1.16121e-05	3.14317e-07
1597.93	7943.6	2		0.298677	0.366971	-0.234158	-7.07788	-2.39281		2011-02-25	0.298906	0.363425	-0.231119	-8.97999	-5.81405			2011-02-25	0.298449	0.370516	-0.237198	-5.17577	1.02844																								5.21414e-08	1.25706e-05	9.2388e-06
1599.93	7959.9	2		0.295316	0.338672	-0.23466	-5.2643	-5.27502		2011-03-01	0.29504	0.332688	-0.24395	-5.60094	-4.75914			2011-03-01	0.295592	0.344656	-0.225371	-4.92767	-5.7909																								7.63211e-08	3.58065e-05	8.62895e-05
1601.93	7976.5	2		0.283294	0.342547	-0.229626	-1.03007	3.83522		2011-03-17	0.281372	0.341784	-0.216043	-1.89869	0.65247			2011-03-18	0.285217	0.343309	-0.243209	-0.161454	7.01798																								3.69732e-06	5.81704e-07	0.000184505
1603.93	7992	2		0.291039	0.343356	-0.221701	-3.74263	-3.75014		2011-03-09	0.290044	0.336679	-0.220531	-4.30242	-5.59883			2011-03-09	0.292034	0.350032	-0.222871	-3.18284	-1.90145																								9.89938e-07	4.4576e-05	1.36858e-06
1605.93	8008.9	2		0.295385	0.357422	-0.238661	-7.73961	-2.73201		2011-03-15	0.293982	0.348876	-0.235257	-6.85895	-3.88983			2011-03-15	0.296787	0.365967	-0.242064	-8.62026	-1.5742																								1.96767e-06	7.30295e-05	1.15837e-05
1607.93	8025.6	2		0.284743	0.340127	-0.210485	1.22339	0.679728		2011-03-09	0.28585	0.325828	-0.223935	1.17698	-0.0313558			2011-03-09	0.283637	0.354426	-0.197036	1.26981	1.39081																								1.22376e-06	0.000204466	0.000180886
1609.94	8041.6	2		0.289561	0.343002	-0.232701	-4.58066	-1.59199		2011-02-25	0.288243	0.350853	-0.226292	-4.03819	-0.170465			2011-02-25	0.290879	0.335151	-0.23911	-5.12312	-3.01351																								1.73809e-06	6.16398e-05	4.10768e-05
1611.94	8057.7	3		0.295049	0.36585	-0.22093	-2.87898	0.149453		2011-03-17	0.289185	0.373148	-0.209046	-0.822935	3.69915			2011-03-17	0.299052	0.355179	-0.236664	-1.31492	1.07345			2011-03-22	0.296911	0.369222	-0.217081	-6.49909	-4.32424																3.43932e-05	5.32688e-05	0.000141239
1613.94	8073.1	2		0.294166	0.351553	-0.233348	1.28783	4.21965		2011-03-16	0.294834	0.343954	-0.240675	-1.84154	0.790116			2011-03-16	0.293498	0.359152	-0.226022	4.4172	7.64918																								4.4616e-07	5.77508e-05	5.36763e-05
1616.01	8091.3	2		0.292567	0.366943	-0.206249	-1.7845	-0.691945		2011-03-11	0.290943	0.367767	-0.208999	-1.83512	0.747144			2011-03-11	0.294191	0.36612	-0.203499	-1.73388	-2.13103																								2.63691e-06	6.78222e-07	7.56178e-06
1617.95	8107.2	3		0.298925	0.429368	-0.191474	-12.9982	-3.98726		2011-03-02	0.297113	0.43217	-0.188854	-12.1694	-2.34807			2011-03-02	0.297229	0.439701	-0.180492	-21.2395	-11.5097			2011-04-20	0.302434	0.416233	-0.205077	-5.58565	1.896																3.2835e-06	7.8494e-06	6.86667e-06
1619.95	8122.5	2		0.291871	0.367429	-0.212596	-0.934506	1.95072		2011-03-14	0.289473	0.369765	-0.201039	0.0253707	1.90164			2011-03-14	0.294269	0.365094	-0.224154	-1.89438	1.99979																								5.7494e-06	5.4542e-06	0.000133571
1622.06	8140.1	2		0.295082	0.375595	-0.210723	-4.61506	-1.67548		2011-03-16	0.295249	0.380151	-0.211804	-3.3041	0.784502			2011-03-16	0.294915	0.371038	-0.209641	-5.92603	-4.13546																								2.78381e-08	2.07643e-05	1.16979e-06
1623.96	8156.3	2		0.292754	0.379425	-0.211748	-7.8385	-2.77294		2011-03-10	0.293597	0.375385	-0.210181	-6.6615	-3.21324			2011-03-10	0.291911	0.383464	-0.213315	-9.01549	-2.33264																								7.10456e-07	1.63177e-05	2.45541e-06
1625.96	8171.6	2		0.294145	0.361358	-0.221901	1.79321	4.36476		2011-03-18	0.295211	0.365917	-0.221739	0.95652	4.04823			2011-03-19	0.293078	0.356799	-0.222063	2.62991	4.6813																								1.13728e-06	2.07841e-05	2.62731e-08
1627.96	8188.6	2		0.29302	0.369079	-0.221032	-5.46235	-0.782837		2011-03-19	0.293012	0.374222	-0.227751	-3.89296	3.37787			2011-03-19	0.293029	0.363936	-0.214313	-7.03174	-4.94354																								7.44275e-11	2.64478e-05	4.51491e-05
1629.96	8205.8	3		0.287472	0.362025	-0.216015	-5.06447	-0.650458		2011-03-18	0.284157	0.365243	-0.20935	-4.97923	0.107567			2011-03-18	0.288702	0.350268	-0.233128	-6.27502	-1.19459			2011-03-22	0.289557	0.370565	-0.205566	-3.93916	-0.864349																1.09903e-05	1.03519e-05	4.44227e-05
1631.99	8222.9	2		0.295287	0.380258	-0.208806	-5.24876	-1.78307		2011-03-17	0.293804	0.375895	-0.200094	-3.91254	-2.70583											2011-03-22	0.296769	0.384621	-0.217518	-6.58499	-0.860314																2.19771e-06	1.90358e-05	7.58977e-05
1633.97	8239	2		0.306848	0.365202	-0.234736	-1.27629	-0.476125		2011-03-11	0.305714	0.360855	-0.238719	-2.36712	-1.14039			2011-03-11	0.307981	0.36955	-0.230754	-0.185463	0.188142																								1.28454e-06	1.89011e-05	1.58588e-05
1635.97	8256.6	2		0.292138	0.362192	-0.217283	-6.84284	-4.10238		2011-03-17	0.291137	0.355241	-0.214968	-9.27058	-8.1001			2011-03-17	0.293139	0.369143	-0.219598	-4.4151	-0.104666																								1.00142e-06	4.83199e-05	5.3591e-06
1637.97	8272.2	2		0.297176	0.356152	-0.219785	-5.19913	-5.44138		2011-03-14	0.296554	0.359806	-0.22077	-2.6481	-1.63947			2011-03-14	0.297797	0.352497	-0.2188	-7.75016	-9.24329																								3.86706e-07	1.33584e-05	9.70659e-07
1639.98	8290.2	2		0.299638	0.403428	-0.207887	-3.46561	2.99076		2011-03-10	0.297588	0.415948	-0.200633	-1.16562	7.30083			2011-03-10	0.298674	0.404309	-0.209226	-3.68399	3.68144			2013-07-10	0.302652	0.390027	-0.213802	-5.54722	-2.00998																4.2034e-06	0.000156749	5.26243e-05
1641.98	8307	3		0.291654	0.387406	-0.204667	-5.59842	0.106005		2011-03-09	0.293717	0.400442	-0.203132	-6.62547	0.735376			2011-03-10	0.288469	0.382054	-0.204973	-7.63302	-1.63135			2011-03-22	0.292774	0.379721	-0.205897	-2.53676	1.21399																4.25787e-06	0.000169948	2.35718e-06
1643.97	8324	2		0.292675	0.385377	-0.205019	-7.85206	-2.92333		2011-03-15	0.292141	0.380606	-0.212648	-8.16257	-2.36879			2011-03-15	0.293208	0.390147	-0.197389	-7.54156	-3.47787																								2.84518e-07	2.27573e-05	5.82123e-05
1645.98	8341.1	2		0.286982	0.377466	-0.193915	-2.62348	0.498267		2011-03-21	0.286707	0.366808	-0.201331	-3.56537	-1.02431			2011-03-08	0.287256	0.388124	-0.1865	-1.68158	2.02085																								7.54512e-08	0.000113602	5.49879e-05
1648.16	8360.8	2		0.292689	0.376783	-0.204774	-3.87753	-0.963422		2011-03-08	0.293221	0.375156	-0.20352	-4.14386	-2.08972			2011-03-22	0.292158	0.37841	-0.206027	-3.61121	0.162874																								2.82477e-07	2.64723e-06	1.5718e-06
1649.98	8376.3	2		0.284781	0.359238	-0.201867	-0.124614	1.64683		2011-03-16	0.283178	0.37137	-0.1846	1.07032	2.38515			2011-03-16	0.286383	0.347105	-0.219135	-1.31955	0.908511																								2.56791e-06	0.000147191	0.000298171
1651.98	8394.8	2		0.288835	0.376159	-0.196603	-2.1725	0.44509		2011-04-08	0.287966	0.382795	-0.188225	-1.70456	0.89757			2011-04-08	0.289703	0.369524	-0.204981	-2.64043	-0.0073891																								7.5424e-07	4.40309e-05	7.01877e-05
1653.99	8412	2		0.291955	0.359792	-0.220554	-6.17121	-3.17031		2011-04-04	0.294519	0.35675	-0.215154	-7.56432	-7.50917			2011-04-05	0.289391	0.362834	-0.225954	-4.77811	1.16855																								6.57396e-06	9.25338e-06	2.91614e-05
1655.99	8430.1	2		0.300153	0.38059	-0.212108	-5.66613	-3.49756		2011-03-31	0.298765	0.370102	-0.210107	-7.28823	-7.24429			2011-03-31	0.301542	0.391078	-0.21411	-4.04403	0.249176																								1.92736e-06	0.000109996	4.00484e-06
1659.99	8465.5	2		0.292399	0.406	-0.176512	-6.46086	-3.17047		2011-04-15	0.291666	0.418002	-0.173745	-5.7799	-0.14998			2011-04-15	0.293132	0.393999	-0.179279	-7.14182	-6.19095																								5.36832e-07	0.000144031	7.65692e-06
1662	8482.7	3		0.288179	0.390915	-0.178365	-6.1205	-3.92478		2011-04-13	0.285923	0.401729	-0.165229	-3.98086	-1.35446			2011-04-13	0.291314	0.38542	-0.186214	-6.87382	-5.50332			2011-04-18	0.2873	0.385597	-0.18365	-7.50683	-4.91654																5.08937e-06	0.000116928	0.000172543
1664	8501	2		0.290252	0.399789	-0.184926	-8.08836	-3.3592		2011-04-01	0.289829	0.401259	-0.188546	-8.71801	-2.67532			2011-04-01	0.290674	0.398319	-0.181306	-7.45872	-4.04309																								1.78794e-07	2.1621e-06	1.31046e-05
1666.04	8518.7	2		0.292588	0.393588	-0.181924	4.05643	5.56015		2011-04-06	0.294644	0.406635	-0.171859	3.306	4.58906			2011-04-06	0.290532	0.380541	-0.19199	4.80686	6.53124																								4.22718e-06	0.000170232	0.000101318
1670	8554.3	3		0.294259	0.417317	-0.179729	0.806017	6.37931		2011-03-28	0.29021	0.417231	-0.183004	2.87423	10.8682			2011-03-29	0.296083	0.417279	-0.18197	0.543427	5.81765			2011-04-19	0.296485	0.417439	-0.174214	-0.999607	2.45205																1.6398e-05	7.35691e-09	1.07229e-05
1680.01	8643.1	2		0.294028	0.413657	-0.16483	-0.534888	1.07296		2011-03-31	0.292753	0.418113	-0.155713	0.279088	1.39872			2011-03-31	0.295302	0.409202	-0.173948	-1.34886	0.747199																								1.62474e-06	1.98518e-05	8.31332e-05
1682.02	8662.3	2		0.28467	0.382633	-0.181224	-2.10204	0.354344		2011-03-29	0.285243	0.389744	-0.188491	-2.93429	2.45319			2011-03-29	0.284097	0.375523	-0.173957	-1.26979	-1.7445																								3.28527e-07	5.05577e-05	5.28113e-05
1684.02	8678.6	2		0.300943	0.442204	-0.145324	-4.33815	-3.67021		2011-04-03	0.298529	0.438163	-0.144338	-4.75363	-4.14277			2011-04-04	0.303357	0.446245	-0.14631	-3.92267	-3.19766																								5.82522e-06	1.63325e-05	9.7207e-07
1686.02	8697.4	2		0.293736	0.440059	-0.161624	-3.4421	3.44482		2013-07-08	0.293015	0.436042	-0.153245	-3.02016	1.44225			2013-07-08	0.294456	0.444075	-0.170003	-3.86405	5.44738																								5.1931e-07	1.61322e-05	7.02081e-05
1696.03	8786.7	3		0.291708	0.453809	-0.142115	-0.618803	5.8328		2011-04-12	0.28861	0.455099	-0.142753	-1.8095	6.42461			2011-04-13	0.294903	0.457405	-0.136087	-0.563772	3.97019			2011-04-18	0.291611	0.448924	-0.147505	0.516864	7.10359																9.5986e-06	1.66322e-06	4.07314e-07
1698.03	8805.6	2		0.295952	0.461097	-0.135136	-4.25936	0.482107		2011-04-04	0.296724	0.458651	-0.128724	-6.22275	-3.73519			2011-04-04	0.295179	0.463542	-0.141548	-2.29597	4.6994																								5.97041e-07	5.98074e-06	4.11126e-05
1700.03	8823.8	2		0.287781	0.449731	-0.121217	-1.03393	1.62221		2011-04-14	0.289736	0.443765	-0.125203	-1.77237	-0.386034			2011-04-14	0.285826	0.455698	-0.117231	-0.295479	3.63044																								3.82146e-06	3.56011e-05	1.58885e-05
1726.05	9070.6	2		0.289667	0.48099	-0.111608	-3.43497	3.21039		2013-07-08	0.287856	0.486909	-0.11603	-2.16368	7.52193			2013-07-08	0.291478	0.47507	-0.107187	-4.70626	-1.10115																								3.27863e-06	3.50433e-05	1.95527e-05
1768.08	9471.7	2		0.306984	0.578244	-0.028713	-1.72244	0.571223		2013-07-05	0.307689	0.575679	-0.0292697	-2.01008	-0.459024			2013-07-05	0.306279	0.580808	-0.0281562	-1.4348	1.60147																								4.97605e-07	6.57669e-06	3.09947e-07
1780.98	9593.3	2		0.313923	0.590026	-0.0298569	-4.48324	-2.30041																		2016-07-06	0.312744	0.588324	-0.0275968	-5.90598	-4.06374			2016-07-06	0.315102	0.591727	-0.032117	-3.0605	-0.537082
1810.11	9878.1	2		0.306533	0.671863	0.0609572	-2.53054	0.840291		2013-07-05	0.308742	0.666644	0.0539841	-3.36336	-0.548454			2013-07-05	0.304324	0.677082	0.0679303	-1.69772	2.22904																								4.88068e-06	2.72388e-05	4.86242e-05
1848.14	10259.3	2		0.301813	0.774847	0.181231	-1.71777	-0.126317		2013-07-07	0.306993	0.778935	0.177116	-1.53033	-0.374961			2013-07-07	0.296633	0.770759	0.185347	-1.9052	0.122327																								2.68322e-05	1.67089e-05	1.69376e-05
1887.6	10658.7	2		0.325903	0.966166	0.324774	-2.2796	-0.574235		2016-05-26	0.325522	0.968471	0.328151	-1.16826	0.448752			2016-05-26	0.326284	0.96386	0.321398	-3.39094	-1.59722																								1.45115e-07	5.31758e-06	1.14013e-05
1888.21	10665	2		0.320524	0.958475	0.314092	-5.35255	-0.615042		2013-07-03	0.319537	0.954256	0.313664	-6.64223	-2.29244			2013-07-03	0.321512	0.962694	0.31452	-4.06287	1.06236																								9.75322e-07	1.78016e-05	1.83385e-07
1913.14	10910.8	4		0.318637	1.03343	0.401065	-1.7901	1.06071		2016-05-12	0.319743	1.01823	0.389304	-2.1095	-0.488519			2016-05-12	0.317191	1.03768	0.405804	-0.906769	2.44913			2016-05-12	0.317783	1.04509	0.408278	-2.01872	2.1846			2016-05-12	0.31983	1.0327	0.400875	-2.12541	0.0976242								1.22327e-06	0.000230965	0.000138331
1930.28	11077.6	2		0.309632	1.07675	0.464778	-1.54439	0.705963		2013-07-05	0.307602	1.0666	0.468063	-3.00836	-2.81578			2013-07-05	0.311663	1.0869	0.461492	-0.0804247	4.2277																								4.12313e-06	0.000103012	1.07964e-05
1942.19	11187	1		0.306156	1.15491	0.525116	-2.80147	4.89588		2012-12-01	0.306156	1.15491	0.525116	-2.80147	4.89588
1963.48	11378.4	1		0.328284	1.22088	0.570803	-3.54424	-0.93565		2012-12-01	0.328284	1.22088	0.570803	-3.54424	-0.93565
1974.82	11475.4	2		0.328572	1.24333	0.592994	-2.65037	-0.124498		2016-05-13	0.328412	1.23961	0.59146	-3.19282	-1.06884			2016-05-13	0.328733	1.24704	0.594528	-2.10792	0.819848																								2.58107e-08	1.37866e-05	2.35347e-06
1981.36	11530.7	1		0.352377	1.30137	0.596052	-3.44741	0.906426		2012-12-02	0.352377	1.30137	0.596052	-3.44741	0.906426
1994.83	11656.5	2		0.347738	1.29241	0.603055	0.0886614	2.87992		2016-05-16	0.348594	1.29146	0.606157	-0.43487	1.10204			2016-05-16	0.346881	1.29336	0.599953	0.612193	4.6578																								7.33533e-07	9.02251e-07	9.62231e-06
1999.59	11704.5	1		0.332138	1.27105	0.603889	-1.74528	2.92986		2012-12-03	0.332138	1.27105	0.603889	-1.74528	2.92986
2014.84	11869.5	2		0.332502	1.26269	0.604561	-3.38257	-0.826621		2016-05-13	0.332576	1.26157	0.599832	-3.25195	0.0629446			2016-05-13	0.332429	1.26382	0.609289	-3.51319	-1.71619																								5.42147e-09	1.27263e-06	2.23591e-05
2017.38	11896.6	1		0.328056	1.26857	0.614693	-3.78108	-0.232933		2012-12-03	0.328056	1.26857	0.614693	-3.78108	-0.232933
2034.87	12091.4	3		0.315792	1.24842	0.620826	-3.2175	-0.164483		2016-05-17	0.314974	1.26818	0.629132	-1.18792	4.70981			2016-05-17	0.314968	1.23592	0.607922	-3.14178	0.3552			2016-07-06	0.317434	1.24116	0.625422	-5.32279	-5.55846																6.69673e-07	0.000390553	6.90031e-05
2035.37	12096.4	1		0.319383	1.2712	0.632644	-5.06013	-1.11648		2012-12-03	0.319383	1.2712	0.632644	-5.06013	-1.11648
2054.85	12309.2	2		0.344282	1.30983	0.623725	-1.04451	2.54078		2016-05-16	0.342757	1.30517	0.622817	-1.20858	2.21387			2016-05-16	0.345808	1.31448	0.624633	-0.880441	2.86769																								2.32681e-06	2.16599e-05	8.24398e-07
2073.64	12518.3	1		0.334736	1.3167	0.656727	-0.195613	1.749		2012-12-03	0.334736	1.3167	0.656727	-0.195613	1.749
2074.83	12531.1	2		0.342203	1.3232	0.647177	-3.49256	-1.18988		2016-05-20	0.342116	1.31676	0.640458	-3.3036	-0.904625			2016-05-20	0.34229	1.32964	0.653896	-3.68152	-1.47513																								7.53374e-09	4.14567e-05	4.51441e-05
2094.84	12751.1	4		0.328681	1.34654	0.694376	-1.86896	1.00238		2016-05-12	0.324765	1.34244	0.696622	-2.23355	0.939076			2016-05-12	0.33002	1.3484	0.696153	-1.00615	1.29036			2016-05-12	0.328696	1.34389	0.688823	-2.19727	1.31106			2016-05-12	0.331243	1.35144	0.695906	-2.03886	0.469029								1.53331e-05	1.68102e-05	5.04287e-06
2109.37	12901.7	1		0.34219	1.40846	0.728468	-2.19285	0.969848		2012-12-04	0.34219	1.40846	0.728468	-2.19285	0.969848
2114.84	12957.8	2		0.342805	1.44185	0.762262	-1.69201	1.10836										2016-05-23	0.341069	1.43094	0.761168	-1.85271	-0.462138			2016-07-06	0.344541	1.45277	0.763357	-1.53131	2.67886
2127.38	13091	1		0.329091	1.46074	0.799543	-6.19916	-1.44869		2012-12-06	0.329091	1.46074	0.799543	-6.19916	-1.44869
2134.84	13172.8	2		0.34144	1.44731	0.77134	-2.4545	0.150091		2016-06-27	0.341576	1.44459	0.767623	-2.34712	0.417417			2016-06-27	0.341305	1.45003	0.775058	-2.56188	-0.117236																								1.83999e-08	7.38316e-06	1.38197e-05
2145.67	13292.6	1		0.325547	1.48049	0.829314	-2.37607	1.63911		2012-12-01	0.325547	1.48049	0.829314	-2.37607	1.63911
2154.83	13393.7	2		0.33438	1.50033	0.841825	-1.53347	0.263558		2016-06-27	0.336009	1.50448	0.842481	-1.32884	0.531105			2016-06-27	0.332752	1.49617	0.841168	-1.7381	-0.00398891																								2.65274e-06	1.72599e-05	4.30989e-07
2174.83	13610.4	2		0.340783	1.58821	0.903262	-2.46105	2.40574		2016-05-25	0.343151	1.59187	0.902783	-2.23317	2.51622			2016-05-25	0.338415	1.58456	0.903741	-2.68893	2.29526																								5.60614e-06	1.33437e-05	2.29293e-07
2181.36	13682.4	1		0.335807	1.57871	0.908402	-3.51638	0.293833		2012-12-03	0.335807	1.57871	0.908402	-3.51638	0.293833
2194.83	13839.3	2		0.338955	1.63224	0.958792	-2.7408	0.387049		2016-05-27	0.336725	1.6325	0.960014	-2.47319	1.40371			2016-05-27	0.341184	1.63197	0.95757	-3.00841	-0.629609																								4.97042e-06	7.03928e-08	1.49326e-06
2205.07	13962.4	2		0.341865	1.64027	0.955559	-1.67117	2.66386		2016-06-30	0.341408	1.63855	0.96423	-1.46692	0.77255			2016-06-30	0.342322	1.642	0.946888	-1.87541	4.55516																								2.08821e-07	2.98634e-06	7.51907e-05
2207.36	13989.9	1		0.325738	1.63098	0.987696	-3.39045	-1.17864		2012-12-04	0.325738	1.63098	0.987696	-3.39045	-1.17864
2224.96	14196.9	4		0.345314	1.72485	1.03385	-2.27206	1.96542		2016-05-27	0.340839	1.73082	1.04904	-3.34899	0.809493			2016-05-27	0.347127	1.71705	1.02206	-1.92936	2.39733			2016-07-06	0.344111	1.73169	1.04416	-2.4362	1.56068			2016-07-07	0.349177	1.71983	1.02014	-1.37369	3.09416								2.00202e-05	3.56348e-05	0.000230716
2225.28	14199.8	1		0.344435	1.70318	1.0202	-1.69617	1.14638		2012-12-01	0.344435	1.70318	1.0202	-1.69617	1.14638
2234.87	14307.5	2		0.35707	1.75783	1.04897	-1.523	1.55388		2016-06-29	0.355954	1.7544	1.04682	-1.55602	1.72078			2016-06-29	0.358185	1.76127	1.05112	-1.48997	1.38698																								1.24376e-06	1.1796e-05	4.62451e-06
2244.36	14410.4	1		0.363439	1.78656	1.06361	-2.16062	1.27458		2012-12-04	0.363439	1.78656	1.06361	-2.16062	1.27458
2244.96	14417	2		0.365718	1.78743	1.0545	-2.30142	2.34821		2016-05-20	0.365422	1.77796	1.04922	-3.02808	0.838327			2016-05-20	0.366014	1.7969	1.05978	-1.57475	3.85809																								8.74386e-08	8.96729e-05	2.78866e-05
2254.97	14527.2	2		0.365812	1.80223	1.07438	-2.58529	0.909637		2016-05-20	0.365142	1.80172	1.07384	-2.51327	1.27621			2016-05-20	0.366483	1.80275	1.07492	-2.6573	0.543066																								4.49802e-07	2.64498e-07	2.91887e-07
2262.47	14611.2	1		0.36736	1.80586	1.08212	-1.50103	0.40069		2012-12-02	0.36736	1.80586	1.08212	-1.50103	0.40069
2264.77	14636.8	2		0.373495	1.8168	1.07738	-1.90613	0.805602		2016-06-27	0.374134	1.81653	1.07711	-1.739	0.691091			2016-06-27	0.372855	1.81708	1.07764	-2.07326	0.920113																								4.0927e-07	7.49632e-08	6.89864e-08
2275.14	14758.4	2		0.38146	1.84158	1.08559	-3.26463	-0.329262		2016-06-29	0.382425	1.84936	1.08995	-3.69474	-0.416954			2016-06-29	0.380494	1.8338	1.08124	-2.83452	-0.241569																								9.32515e-07	6.05355e-05	1.90084e-05
2280.36	14820.6	1		0.362341	1.82311	1.10354	-3.17417	0.00703232		2012-12-01	0.362341	1.82311	1.10354	-3.17417	0.00703232
2285.09	14876.9	2		0.370658	1.83941	1.10078	-0.733315	3.0116		2016-05-24	0.368912	1.83941	1.10618	-0.522203	2.78497			2016-05-24	0.372404	1.83941	1.09538	-0.944426	3.23823																								3.04902e-06	1.36394e-12	2.91621e-05
2295.14	14999.3	2		0.361523	1.81624	1.09927	-1.71265	1.22785		2016-05-26	0.363566	1.82295	1.10206	-1.73744	1.18195			2016-05-26	0.359479	1.80953	1.09647	-1.68787	1.27374																								4.17586e-06	4.50082e-05	7.80794e-06
2298.35	15038.3	1		0.35757	1.82359	1.11171	-3.91942	-0.356399		2012-11-30	0.35757	1.82359	1.11171	-3.91942	-0.356399
2314.97	15241.2	2		0.373022	1.83143	1.08845	-1.9981	1.70058										2016-05-27	0.375797	1.83039	1.07968	-1.70087	2.49599			2016-07-07	0.370248	1.83247	1.09722	-2.29533	0.905167
2316.35	15258.5	1		0.370284	1.83334	1.10209	-2.31517	-0.0114719		2012-12-02	0.370284	1.83334	1.10209	-2.31517	-0.0114719
2334.35	15504.5	1		0.354663	1.80528	1.10215	-2.83285	0.0431281		2012-12-04	0.354663	1.80528	1.10215	-2.83285	0.0431281
2334.95	15512	4		0.363815	1.80985	1.08754	-2.20296	0.92918		2016-05-26	0.362539	1.81207	1.09039	-2.37545	1.17142			2016-05-26	0.365008	1.82188	1.09549	-1.35313	2.14784			2016-07-06	0.364316	1.80336	1.08082	-3.30077	-0.317154			2016-07-07	0.363397	1.80211	1.08347	-1.7825	0.71461								1.62821e-06	4.90166e-06	8.11146e-06
2344.95	15660.3	2		0.382727	1.83259	1.07526	-2.27463	0.392153		2016-05-25	0.383774	1.83426	1.07418	-2.55382	0.270043			2016-05-25	0.381679	1.83092	1.07634	-1.99544	0.514263																								1.09688e-06	2.7884e-06	1.16652e-06
2353.62	15792.8	1		0.359342	1.83238	1.11284	-3.44767	1.02664		2012-12-03	0.359342	1.83238	1.11284	-3.44767	1.02664
2364.95	15972.9	2		0.368782	1.79551	1.06245	-2.45793	0.897208		2016-05-24	0.369702	1.79045	1.05714	-2.51571	0.497631			2016-05-24	0.367862	1.80056	1.06775	-2.40016	1.29678																								8.46073e-07	2.55739e-05	2.81612e-05
2365.35	15980.5	1		0.364181	1.79524	1.06794	-4.5705	-0.462297		2012-08-06	0.364181	1.79524	1.06794	-4.5705	-0.462297
2375.36	16160.6	1		0.356494	1.74969	1.04465	-3.68645	-1.16857		2012-08-06	0.356494	1.74969	1.04465	-3.68645	-1.16857
2376.22	16177.8	3		0.366521	1.77626	1.04838	-3.10113	0.101034		2016-05-20	0.371748	1.78138	1.04397	-2.90762	0.130747			2016-05-20	0.364045	1.77987	1.05418	-2.62007	1.16354			2016-07-07	0.363771	1.76752	1.04698	-3.77571	-0.991184																2.73212e-05	2.62442e-05	1.94434e-05
2384.96	16348.4	3		0.368684	1.76028	1.02951	-0.219733	2.6401		2016-06-27	0.366219	1.75972	1.03197	-0.561644	2.70211			2016-06-27	0.371709	1.76187	1.02605	-0.0258503	2.6342			2016-06-30	0.368125	1.75927	1.0305	-0.0717054	2.58401																6.07861e-06	3.20714e-07	6.07259e-06
2385.37	16354.7	1		0.368099	1.76755	1.03837	-1.80428	0.981703		2012-08-03	0.368099	1.76755	1.03837	-1.80428	0.981703
2394.96	16546	2		0.371643	1.76298	1.02604	-2.50207	0.472911		2016-05-27	0.372371	1.76186	1.02427	-2.39404	0.406307			2016-05-27	0.370916	1.7641	1.0278	-2.61011	0.539515																								5.29404e-07	1.25207e-06	3.10495e-06
2395.37	16555.4	1		0.364238	1.77109	1.04449	-2.53586	1.3623		2012-08-06	0.364238	1.77109	1.04449	-2.53586	1.3623
2405.32	16767.2	1		0.362305	1.75071	1.02339	-4.85666	0.0717923		2012-08-07	0.362305	1.75071	1.02339	-4.85666	0.0717923
2415.08	16994.7	2		0.354597	1.7118	1.00172	-4.82315	-0.360059		2016-05-25	0.355469	1.71163	1.00001	-4.73307	-0.308118			2016-05-25	0.353725	1.71196	1.00344	-4.91323	-0.412																								7.59712e-07	2.80407e-08	2.93067e-06
2415.38	17002.3	1		0.355396	1.70735	1.00378	-4.71578	-2.03023		2012-08-06	0.355396	1.70735	1.00378	-4.71578	-2.03023
2424.97	17239.2	2		0.323894	1.62716	0.980307	-4.88278	-1.06495		2016-05-26	0.323569	1.62416	0.979114	-5.27225	-1.70632			2016-05-26	0.324219	1.63017	0.981501	-4.49331	-0.423588																								1.05721e-07	9.01786e-06	1.42349e-06
2425.38	17250.3	1		0.326146	1.63285	0.979	-4.58451	-0.204033		2012-08-07	0.326146	1.63285	0.979	-4.58451	-0.204033
2434.97	17496	2		0.341388	1.63813	0.959405	-4.83746	-1.56553		2016-05-25	0.343043	1.63382	0.95264	-4.63321	-1.53993			2016-05-25	0.339733	1.64244	0.966169	-5.0417	-1.59113																								2.7378e-06	1.85966e-05	4.5755e-05
2435.38	17506.5	1		0.335492	1.63693	0.968572	-4.15494	-0.629039		2012-08-06	0.335492	1.63693	0.968572	-4.15494	-0.629039
2444.98	17768.3	2		0.345117	1.61769	0.934464	-3.58276	-0.952013		2016-06-29	0.346537	1.61201	0.925902	-3.70008	-1.04674			2016-06-29	0.343698	1.62337	0.943025	-3.46545	-0.857281																								2.01568e-06	3.22592e-05	7.3299e-05
2445.38	17778.8	1		0.343481	1.63064	0.951682	-2.50773	-0.12549		2012-08-06	0.343481	1.63064	0.951682	-2.50773	-0.12549
2454.98	18067.8	2		0.346402	1.64947	0.957343	-3.92959	0.110858		2016-05-19	0.345438	1.65343	0.963957	-3.90999	-0.0363702			2016-05-19	0.347365	1.6455	0.95073	-3.94919	0.258086																								9.27682e-07	1.5731e-05	4.37387e-05
2455.39	18080.2	1		0.345088	1.64938	0.964721	-4.60404	-1.6293		2012-08-03	0.345088	1.64938	0.964721	-4.60404	-1.6293
2464.98	18388.1	2		0.347498	1.66181	0.96662	-4.76581	-0.512168		2016-05-19	0.349013	1.65892	0.961432	-4.89132	-0.783621			2016-05-19	0.345983	1.66469	0.971809	-4.64029	-0.240715																								2.29573e-06	8.32519e-06	2.69213e-05
2465.38	18401.6	1		0.35177	1.66809	0.968188	-2.82665	0.587129		2012-08-06	0.35177	1.66809	0.968188	-2.82665	0.587129
2474.99	18708	2		0.357512	1.66527	0.959756	-1.42722	0.720084																		2016-06-30	0.358222	1.65963	0.952747	-1.68015	0.465004			2016-07-07	0.356802	1.67092	0.966765	-1.17428	0.975164
2475.39	18720.3	1		0.351518	1.66656	0.9664	-2.833	0.748334		2012-08-07	0.351518	1.66656	0.9664	-2.833	0.748334
2484.99	19029.7	2		0.365956	1.68687	0.963462	-2.11778	0.32941		2016-05-16	0.36576	1.68516	0.961723	-2.11018	0.42734			2016-05-16	0.366152	1.68859	0.965201	-2.12539	0.23148																								3.83819e-08	2.93348e-06	3.02355e-06
2485.39	19043	1		0.361917	1.69082	0.97497	-2.95732	-0.414594		2012-08-03	0.361917	1.69082	0.97497	-2.95732	-0.414594
2494.98	19353.5	2		0.375741	1.71902	0.972738	-2.33326	0.923249		2016-05-18	0.37496	1.71891	0.974015	-2.25862	1.0282			2016-05-18	0.376521	1.71913	0.971461	-2.40791	0.818301																								6.09315e-07	1.27683e-08	1.62999e-06
2495.56	19371.9	1		0.369894	1.72048	0.989432	-1.74082	0.680009		2012-08-04	0.369894	1.72048	0.989432	-1.74082	0.680009
2504.99	19674.3	2		0.381543	1.73571	0.982361	-0.878417	1.40292		2016-05-18	0.38042	1.73674	0.985376	-0.764984	1.5626			2016-05-18	0.382667	1.73468	0.979345	-0.991849	1.24324																								1.26237e-06	1.056e-06	9.09358e-06
2505.39	19687	1		0.375544	1.73677	0.992949	-3.08941	-0.278343		2012-08-02	0.375544	1.73677	0.992949	-3.08941	-0.278343
2514.99	20002.7	2		0.388076	1.73851	0.971701	-0.71822	1.69948		2016-05-18	0.388477	1.74395	0.976729	-0.684461	1.65023			2016-05-18	0.387675	1.73307	0.966672	-0.751979	1.74874																								1.60824e-07	2.96063e-05	2.52848e-05
2515.54	20020.7	1		0.384207	1.73558	0.973809	-3.21604	-0.19597		2012-08-02	0.384207	1.73558	0.973809	-3.21604	-0.19597
2525	20326.6	3		0.392323	1.74478	0.968498	-2.3035	0.390506		2016-05-13	0.38894	1.73941	0.970327	-2.31977	0.251276			2016-05-13	0.393638	1.74106	0.961296	-2.04091	0.846792			2016-07-06	0.39439	1.75388	0.973871	-2.54983	0.0734507																1.14424e-05	2.88611e-05	3.34452e-06
2525.46	20341.7	1		0.397056	1.74954	0.962645	-1.86812	1.10839		2012-08-03	0.397056	1.74954	0.962645	-1.86812	1.10839
2535.45	20657.1	1		0.385574	1.72938	0.964482	-2.03758	1.06167		2012-08-03	0.385574	1.72938	0.964482	-2.03758	1.06167
2545.07	20981.7	2		0.386285	1.709	0.942899	-2.61895	0.447099		2016-05-17	0.386789	1.70962	0.94312	-2.8526	0.087473			2016-05-17	0.385782	1.70838	0.942678	-2.38531	0.806725																								2.53622e-07	3.85953e-07	4.8884e-08
2545.41	20993.6	1		0.386305	1.71794	0.952059	-3.01123	0.00376294		2012-08-02	0.386305	1.71794	0.952059	-3.01123	0.00376294
2552.42	21234	1		0.382043	1.6916	0.938063	-2.23114	-0.104242		2012-08-02	0.382043	1.6916	0.938063	-2.23114	-0.104242
2564.78	21669.2	3		0.387908	1.68936	0.922763	-1.7937	0.667683		2016-05-17	0.386025	1.68052	0.91872	-2.04955	0.173007											2016-06-30	0.394135	1.69511	0.915673	-1.47929	1.11178			2016-07-07	0.383563	1.69246	0.933896	-1.85225	0.718267								3.54295e-06	7.81729e-05	1.63477e-05
2564.99	21676.3	1		0.383544	1.68837	0.930768	-3.61211	-1.21742		2012-08-02	0.383544	1.68837	0.930768	-3.61211	-1.21742
2575.42	22044.5	1		0.385127	1.6596	0.897021	-1.64565	1.12965		2012-08-03	0.385127	1.6596	0.897021	-1.64565	1.12965
2580.43	22216	1		0.385812	1.66761	0.904555	-2.1213	0.46998		2012-12-01	0.385812	1.66761	0.904555	-2.1213	0.46998
2598.55	22845.6	1		0.371546	1.67015	0.934114	-3.27809	-0.450422		2012-11-28	0.371546	1.67015	0.934114	-3.27809	-0.450422
2616.41	23478.8	1		0.368052	1.61745	0.889114	-2.30719	0.32098		2012-11-30	0.368052	1.61745	0.889114	-2.30719	0.32098
2625.01	23758.3	2		0.398675	1.6223	0.834623	-0.514171	1.91433		2016-05-19	0.400766	1.62897	0.837749	-0.5728	1.7319			2016-05-19	0.396584	1.61564	0.831498	-0.455541	2.09676																								4.37123e-06	4.44073e-05	9.76755e-06
2625.43	23772.5	1		0.385298	1.62026	0.85902	-1.5667	0.838384		2012-12-05	0.385298	1.62026	0.85902	-1.5667	0.838384
2634.68	24068.7	1		0.372729	1.57534	0.839251	-1.03238	1.26161		2012-11-29	0.372729	1.57534	0.839251	-1.03238	1.26161
2644.43	24380.2	1		0.393654	1.59683	0.820991	-0.853986	1.14406		2012-12-06	0.393654	1.59683	0.820991	-0.853986	1.14406
2654.44	24691.6	1		0.386977	1.56017	0.798117	-1.2045	0.648203		2012-11-29	0.386977	1.56017	0.798117	-1.2045	0.648203
2671.45	25204.8	1		0.387691	1.52925	0.762892	-0.671915	1.81392		2012-12-01	0.387691	1.52925	0.762892	-0.671915	1.81392
2680.45	25480.6	1		0.377062	1.45885	0.718998	-0.883733	0.362047		2012-12-06	0.377062	1.45885	0.718998	-0.883733	0.362047
2689.46	25769	1		0.371606	1.48332	0.738337	-5.0509	-0.250218		2012-11-28	0.371606	1.48332	0.738337	-5.0509	-0.250218
2707.95	26347.2	1		0.358676	1.38338	0.679975	-0.662233	0.504048		2012-11-28	0.358676	1.38338	0.679975	-0.662233	0.504048
2715.48	26578.5	1		0.362108	1.36765	0.655447	-0.524378	1.09472		2012-12-05	0.362108	1.36765	0.655447	-0.524378	1.09472
2725.47	26880.2	1		0.357722	1.33791	0.633063	-0.722368	1.17503		2012-12-04	0.357722	1.33791	0.633063	-0.722368	1.17503
2734.46	27150.1	1		0.375614	1.3772	0.635955	-0.317024	1.85269		2012-12-03	0.375614	1.3772	0.635955	-0.317024	1.85269
2753.45	27689.5	1		0.375457	1.37094	0.631371	0.0636805	1.92808		2012-12-02	0.375457	1.37094	0.631371	0.0636805	1.92808
2762.43	27941.6	1		0.357424	1.32707	0.625336	-0.676959	0.662364		2012-11-28	0.357424	1.32707	0.625336	-0.676959	0.662364
2780.41	28455.1	1		0.355499	1.28196	0.582734	-1.87463	-0.236856		2012-12-02	0.355499	1.28196	0.582734	-1.87463	-0.236856
2789.41	28742.5	1		0.345384	1.28066	0.600414	-1.29385	0.529489		2012-12-05	0.345384	1.28066	0.600414	-1.29385	0.529489
2798.4	29025.5	1		0.325608	1.24684	0.608373	-1.36892	-0.194453		2012-11-30	0.325608	1.24684	0.608373	-1.36892	-0.194453
2805.08	29234.7	1		0.348671	1.26598	0.578899	-1.83328	0.0833784		2012-12-06	0.348671	1.26598	0.578899	-1.83328	0.0833784
2811.82	29447.5	1		0.334509	1.22053	0.561478	-1.97569	-0.10681		2012-11-29	0.334509	1.22053	0.561478	-1.97569	-0.10681
2818.53	29665	1		0.340205	1.19892	0.528879	-0.920741	0.888787		2012-12-03	0.340205	1.19892	0.528879	-0.920741	0.888787
2826.16	29919.4	1		0.311696	1.13112	0.516769	-0.633769	1.23314		2012-11-30	0.311696	1.13112	0.516769	-0.633769	1.23314
2832.77	30149.5	1		0.329352	1.14915	0.501307	-1.52501	0.0969326		2012-12-06	0.329352	1.14915	0.501307	-1.52501	0.0969326
2839.51	30400.1	1		0.323404	1.11126	0.476185	-1.28661	0.0935281		2012-12-02	0.323404	1.11126	0.476185	-1.28661	0.0935281
2846.35	30654.8	1		0.325355	1.1067	0.464557	-1.90423	0.197389		2012-12-05	0.325355	1.1067	0.464557	-1.90423	0.197389
2852.99	30919.6	1		0.32329	1.09777	0.458561	-1.31573	1.02346		2012-12-01	0.32329	1.09777	0.458561	-1.31573	1.02346
2859.74	31246.7	1		0.316831	1.06139	0.435656	-2.00468	0.170343		2012-12-06	0.316831	1.06139	0.435656	-2.00468	0.170343
2866.48	31632.7	1		0.329236	1.07144	0.425479	-1.22634	0.0281227		2012-11-29	0.329236	1.07144	0.425479	-1.22634	0.0281227
2880.72	32413.5	1		0.340422	1.11125	0.439466	-1.66935	0.44168		2012-11-30	0.340422	1.11125	0.439466	-1.66935	0.44168
2887.49	32719.3	1		0.351953	1.12285	0.429623	-1.12489	0.714912		2012-12-06	0.351953	1.12285	0.429623	-1.12489	0.714912
2894.3	32998.2	1		0.354409	1.11024	0.412217	-1.17325	0.660426		2012-11-29	0.354409	1.11024	0.412217	-1.17325	0.660426
2900.95	33304.3	1		0.346682	1.07062	0.385059	-0.570376	1.85143		2012-12-04	0.346682	1.07062	0.385059	-0.570376	1.85143
2907.73	33629.1	1		0.333664	1.07601	0.417905	-1.57654	0.442516		2012-11-30	0.333664	1.07601	0.417905	-1.57654	0.442516
2914.43	33940.3	1		0.35172	1.11051	0.41888	-0.713726	0.868902		2012-12-02	0.35172	1.11051	0.41888	-0.713726	0.868902
2921.28	34232.3	1		0.355047	1.09561	0.39631	-0.0693791	1.75395		2012-11-29	0.355047	1.09561	0.39631	-0.0693791	1.75395
2928.76	34513.3	1		0.348852	1.08687	0.400665	-0.231772	1.38813		2012-12-05	0.348852	1.08687	0.400665	-0.231772	1.38813
2935.4	34761.9	1		0.365548	1.10137	0.380929	-0.0689756	1.86863		2012-12-01	0.365548	1.10137	0.380929	-0.0689756	1.86863
2942.25	35015.4	1		0.364587	1.1278	0.408164	-0.0818484	2.09398		2012-12-04	0.364587	1.1278	0.408164	-0.0818484	2.09398
2948.89	35275.3	1		0.352867	1.13201	0.439388	-0.590326	0.711249		2012-11-29	0.352867	1.13201	0.439388	-0.590326	0.711249
2955.7	35528.9	1		0.377371	1.18851	0.443952	-0.574896	1.5696		2012-12-05	0.377371	1.18851	0.443952	-0.574896	1.5696
2969.86	36074.9	1		0.353105	1.11559	0.419989	-2.23483	-0.354067		2012-12-10	0.353105	1.11559	0.419989	-2.23483	-0.354067
2983.35	36621	1		0.337718	1.02425	0.359369	-1.53427	0.223344		2012-12-10	0.337718	1.02425	0.359369	-1.53427	0.223344
2996.84	37248.3	1		0.34992	1.07549	0.385284	-1.13259	0.92028		2012-12-03	0.34992	1.07549	0.385284	-1.13259	0.92028
3007.19	37740.3	1		0.359365	1.1674	0.460574	-0.848972	0.775318		2012-12-09	0.359365	1.1674	0.460574	-0.848972	0.775318
3017.18	38204.8	1		0.375162	1.24463	0.505429	-1.77011	0.168438		2012-12-12	0.375162	1.24463	0.505429	-1.77011	0.168438
3027.16	38617.8	1		0.377897	1.28737	0.541636	-1.56981	0.622267		2012-12-13	0.377897	1.28737	0.541636	-1.56981	0.622267
3037.15	39009.4	1		0.387731	1.26534	0.501873	-1.24102	0.598519		2012-12-11	0.387731	1.26534	0.501873	-1.24102	0.598519
3047.14	39402.9	1		0.397815	1.2093	0.426157	-1.48222	0.333777		2012-12-12	0.397815	1.2093	0.426157	-1.48222	0.333777
3057.13	39855.6	1		0.381675	1.13314	0.381547	-0.199975	1.62606		2012-12-11	0.381675	1.13314	0.381547	-0.199975	1.62606
3067.12	40362.8	1		0.382723	1.14196	0.389943	-1.23434	0.248907		2012-12-10	0.382723	1.14196	0.389943	-1.23434	0.248907
3077.11	40828.6	1		0.3846	1.12589	0.371137	-1.35314	-0.0777169		2012-12-13	0.3846	1.12589	0.371137	-1.35314	-0.0777169
3087.09	41309.3	1		0.368517	1.15467	0.427581	-1.53456	0.606731		2012-12-11	0.368517	1.15467	0.427581	-1.53456	0.606731
3097.13	41781.6	1		0.379063	1.16644	0.420493	-2.10703	-0.364538		2012-12-12	0.379063	1.16644	0.420493	-2.10703	-0.364538
3107.06	42273.6	1		0.383645	1.12504	0.368873	-1.49851	0.50422		2012-12-13	0.383645	1.12504	0.368873	-1.49851	0.50422
3117.05	42832.8	1		0.376869	1.14136	0.397487	-2.58338	-0.340406		2012-12-12	0.376869	1.14136	0.397487	-2.58338	-0.340406
3127.04	43372.8	1		0.385525	1.20708	0.449041	-2.1448	-0.531868		2012-12-13	0.385525	1.20708	0.449041	-2.1448	-0.531868
3137.03	43874.9	1		0.385376	1.17791	0.417599	-1.77405	0.398073		2012-12-10	0.385376	1.17791	0.417599	-1.77405	0.398073
3147.45	44428.5	1		0.367056	1.12092	0.396998	-2.11194	-0.0280252		2012-12-10	0.367056	1.12092	0.396998	-2.11194	-0.0280252
3152.51	44706.1	1		0.378899	1.15506	0.40527	-2.70635	-0.0372802		2012-12-30	0.378899	1.15506	0.40527	-2.70635	-0.0372802
3157.51	44983.5	1		0.381004	1.1665	0.414536	-2.05089	0.177186		2012-12-11	0.381004	1.1665	0.414536	-2.05089	0.177186
3162	45246	1		0.38055	1.1646	0.412437	-2.75412	-0.276079		2012-12-30	0.38055	1.1646	0.412437	-2.75412	-0.276079
3167.49	45559.4	1		0.368479	1.16861	0.440147	-2.55162	-0.0755211		2012-12-13	0.368479	1.16861	0.440147	-2.55162	-0.0755211
3176.48	46071.7	1		0.386076	1.2228	0.457518	-1.55488	1.40555		2012-12-13	0.386076	1.2228	0.457518	-1.55488	1.40555
3192.9	46950.7	1		0.40719	1.32199	0.518084	-1.11704	1.21243		2012-12-10	0.40719	1.32199	0.518084	-1.11704	1.21243
3202	47388	1		0.406325	1.30013	0.497012	-1.1258	1.40393		2012-12-30	0.406325	1.30013	0.497012	-1.1258	1.40393
3211.01	47824.6	1		0.396319	1.24077	0.45783	-1.106	1.30759		2012-12-10	0.396319	1.24077	0.45783	-1.106	1.30759
3220.92	48321.8	1		0.394859	1.13528	0.353704	-1.81579	0.939524		2013-01-15	0.394859	1.13528	0.353704	-1.81579	0.939524
3229.91	48957.9	1		0.364341	1.05079	0.331693	-1.68769	0.501129		2012-12-13	0.364341	1.05079	0.331693	-1.68769	0.501129
3247.89	50117.9	1		0.362228	0.9931	0.278348	-1.66962	0.475674		2012-12-10	0.362228	0.9931	0.278348	-1.66962	0.475674
3267.09	51348.5	1		0.360499	0.971842	0.258225	-2.88615	-0.22445		2012-12-13	0.360499	0.971842	0.258225	-2.88615	-0.22445
3284.84	52606	1		0.357961	0.956691	0.248681	-2.57673	-0.0571128		2012-12-12	0.357961	0.956691	0.248681	-2.57673	-0.0571128
3293.83	53262.6	1		0.378058	1.02624	0.276535	-1.61125	1.38624		2013-01-15	0.378058	1.02624	0.276535	-1.61125	1.38624
3304.81	54068.3	1		0.37832	1.06878	0.319995	-1.76753	0.91631		2012-12-12	0.37832	1.06878	0.319995	-1.76753	0.91631
3321.79	55222	1		0.379628	1.0044	0.25348	-1.95225	0.638122		2012-12-13	0.379628	1.0044	0.25348	-1.95225	0.638122
3336.11	56712.8	1		0.353273	0.940996	0.243258	-1.94831	0.326295		2012-12-11	0.353273	0.940996	0.243258	-1.94831	0.326295
3346.11	57807.5	1		0.355376	1.07383	0.370073	-2.29422	0.402065		2012-12-12	0.355376	1.07383	0.370073	-2.29422	0.402065
3356.61	59009	1		0.364499	1.28688	0.56407	-1.13676	1.79176		2012-12-11	0.364499	1.28688	0.56407	-1.13676	1.79176
3366.61	60144.6	1		0.400129	1.47135	0.675586	-0.855091	2.72931		2012-12-13	0.400129	1.47135	0.675586	-0.855091	2.72931
3376.61	62106.8	1		0.399286	1.48207	0.692449	-0.666454	1.92794		2012-12-12	0.399286	1.48207	0.692449	-0.666454	1.92794
3386.61	64050.4	1		0.394623	1.45612	0.678375	-0.174727	1.81357		2012-12-13	0.394623	1.45612	0.678375	-0.174727	1.81357
3391.61	64883.7	1		0.397736	1.52547	0.740919	0.0158392	2.15251		2012-12-30	0.397736	1.52547	0.740919	0.0158392	2.15251
3396.61	65806.7	1		0.391144	1.53591	0.765926	0.071528	1.85041		2012-12-11	0.391144	1.53591	0.765926	0.071528	1.85041
[truncated: 20 more columns]

## Sheet: ∆εLAND, fitted δ18O, & dδ18Odt
Gas age (WD2014)	Composite			WAIS Divide only			Siple Dome only
	δ18Oatm	dδ18O/dt	∆εLAND	δ18Oatm	dδ18O/dt	∆εLAND	δ18Oatm	dδ18O/dt	∆εLAND
kyr before 1950	‰	‰/kyr	‰	‰	‰/kyr	‰	‰	‰/kyr	‰
0	0.0133202	0.0478819	0.094157	0.0132533	0.0475733	0.0935794	First Siple Dome discrete measurement available for curve fitting has (WD2014) gas age of 239 years
0.01	0.0128156	0.0529603	0.101194	0.0127532	0.0523769	0.1002
0.02	0.012262	0.0576559	0.107566	0.0122068	0.0568254	0.106203
0.03	0.0116638	0.0618806	0.113145	0.0116179	0.0608419	0.111477
0.04	0.0110261	0.0655562	0.117819	0.0109914	0.0643583	0.115923
0.05	0.0103546	0.0686165	0.121494	0.0103324	0.0673167	0.11946
0.06	0.00965577	0.0710091	0.1241	0.00964688	0.0696712	0.122028
0.07	0.00893654	0.0726969	0.12559	0.00894094	0.0713888	0.123584
0.08	0.00820406	0.073659	0.125943	0.0082211	0.0724502	0.12411
0.09	0.0074656	0.0738911	0.125164	0.00749395	0.0728503	0.123607
0.1	0.00672843	0.0734061	0.123284	0.00676607	0.0725986	0.1221
0.11	0.00599958	0.072233	0.120358	0.00604388	0.0717183	0.119634
0.12	0.00528572	0.0704166	0.116465	0.00533348	0.0702458	0.116276
0.13	0.004593	0.0680156	0.111706	0.00464058	0.0682303	0.112109
0.14	0.00392692	0.0651017	0.106198	0.0039703	0.0657312	0.107233
0.15	0.00329221	0.0617567	0.100075	0.00332714	0.0628178	0.101761
0.16	0.00269273	0.0580707	0.0934823	0.00271487	0.0595662	0.095817
0.17	0.00213142	0.0541395	0.0865707	0.00213647	0.0560579	0.0895299
0.18	0.00161023	0.0500616	0.0794951	0.00159409	0.0523776	0.0830334
0.19	0.00113015	0.0459354	0.0724086	0.00108901	0.0486104	0.0764607
0.2	0.000691166	0.0418571	0.0654589	0.000621696	0.0448399	0.0699409
0.21	0.000292348	0.0379172	0.0587839	0.000191766	0.0411457	0.0635961
0.22	-6.81124e-05	0.0341985	0.0525083	-0.000201914	0.0376015	0.0575378
0.23	-0.000392801	0.0307741	0.0467404	-0.000561179	0.0342729	0.0518642
0.24	-0.000684975	0.0277048	0.0415689	-0.000888476	0.0312161	0.0466579	-0.000789267	0.00098594	0.000302573
0.25	-0.000948437	0.0250383	0.0370613	-0.00118675	0.028476	0.0419834	-0.00080657	0.00247235	0.00256273
0.26	-0.00118739	0.0228077	0.033262	-0.00145936	0.0260853	0.0378861	-0.000839215	0.00405043	0.00494034
0.27	-0.0014063	0.021031	0.0301919	-0.00170989	0.0240642	0.0343912	-0.000887995	0.00569525	0.00739578
0.28	-0.00160973	0.0197109	0.0278479	-0.00194209	0.0224192	0.0315033	-0.000953452	0.00738143	0.0098892
0.29	-0.0018022	0.0188348	0.026204	-0.00215971	0.0211441	0.0292068	-0.00103587	0.00908394	0.0123816
0.3	-0.00198802	0.0183759	0.0252121	-0.00236634	0.0202198	0.0274668	-0.0011353	0.0107787	0.014836
0.31	-0.00217117	0.0182941	0.0248044	-0.00256536	0.0196151	0.0262304	-0.00125154	0.0124431	0.0172178
0.32	-0.00235518	0.0185374	0.0248957	-0.00275977	0.0192885	0.0254288	-0.00138419	0.0140565	0.0194959
0.33	-0.00254299	0.0190439	0.0253861	-0.00295209	0.0191888	0.0249796	-0.00153263	0.0156004	0.0216428
0.34	-0.0027369	0.0197441	0.026165	-0.0031443	0.0192577	0.0247899	-0.0016961	0.0170587	0.0236347
0.35	-0.00293846	0.0205627	0.0271141	-0.00333779	0.0194311	0.024759	-0.00187367	0.0184173	0.0254517
0.36	-0.00314848	0.0214211	0.0281118	-0.00353324	0.0196415	0.0247819	-0.00206427	0.0196645	0.0270772
0.37	-0.00336695	0.0222405	0.0290363	-0.00373071	0.0198201	0.0247529	-0.00226675	0.0207901	0.0284975
0.38	-0.0035931	0.0229436	0.02977	-0.00392951	0.0198994	0.024569	-0.00247984	0.0217856	0.0297012
0.39	-0.00382539	0.0234572	0.0302028	-0.00412834	0.0198147	0.0241329	-0.00270219	0.022643	0.0306781
0.4	-0.00406159	0.0237147	0.0302355	-0.00432526	0.0195071	0.0233567	-0.0029324	0.0233548	0.0314191
0.41	-0.00429883	0.0236575	0.0297825	-0.00451776	0.0189245	0.0221643	-0.00316897	0.0239132	0.0319143
0.42	-0.00453372	0.0232371	0.0287744	-0.00470288	0.0180241	0.0204941	-0.00341032	0.0243098	0.032153
0.43	-0.00476243	0.0224163	0.0271599	-0.00487727	0.0167732	0.0183014	-0.00365479	0.0245347	0.0321229
0.44	-0.00498082	0.0211703	0.024907	-0.0050373	0.0151507	0.0155591	-0.0039006	0.0245765	0.0318091
0.45	-0.00518457	0.0194871	0.0220039	-0.00517921	0.013148	0.0122597	-0.00414586	0.0244221	0.0311941
0.46	-0.00536931	0.0173677	0.0184591	-0.0052992	0.0107688	0.00841483	-0.00438853	0.0240562	0.0302579
0.47	-0.00553072	0.0148263	0.0143009	-0.00539358	0.00802985	0.00405579	-0.00462642	0.0234619	0.0289776
0.48	-0.00566471	0.0118893	0.00957636	-0.00545889	0.00495993	-0.000767637	-0.00485714	0.0226207	0.0273285
0.49	-0.00576751	0.00859491	0.00434985	-0.00549201	0.00159962	-0.0059883	-0.00507814	0.0215131	0.0252846
0.5	-0.00583577	0.00499136	-0.00129909	-0.00549028	-0.00200002	-0.0115235	-0.00528665	0.0201194	0.0228196
0.51	-0.00586669	0.00113598	-0.00727801	-0.00545161	-0.00577877	-0.0172775	-0.0054797	0.01842	0.0199082
0.52	-0.00585806	-0.00290675	-0.0134843	-0.00537453	-0.00966893	-0.0231438	-0.00565416	0.0163973	0.0165279
0.53	-0.00580836	-0.00706692	-0.0198081	-0.0052583	-0.0135972	-0.0290084	-0.00580672	0.014036	0.0126605
0.54	-0.00571677	-0.0112712	-0.0261353	-0.00510291	-0.0174866	-0.0347531	-0.00593391	0.0113248	0.00829373
0.55	-0.00558324	-0.0154446	-0.0323505	-0.00490915	-0.0212589	-0.0402585	-0.00603222	0.00825738	0.00342333
0.56	-0.00540843	-0.0195127	-0.0383402	-0.00467858	-0.0248364	-0.0454077	-0.00609807	0.00483355	-0.00194541
0.57	-0.00519377	-0.0234033	-0.0439955	-0.00441352	-0.0281447	-0.0500896	-0.00612792	0.00106054	-0.00779597
0.58	-0.00494138	-0.0270483	-0.0492148	-0.00411701	-0.031114	-0.0542016	-0.00611836	-0.00304622	-0.0140993
0.59	-0.00465403	-0.0303851	-0.0539063	-0.00379277	-0.0336817	-0.0576531	-0.00606616	-0.00746227	-0.020813
0.6	-0.00433509	-0.0333582	-0.0579897	-0.0034451	-0.0357939	-0.0603676	-0.00596839	-0.0121537	-0.0278801
0.61	-0.00398843	-0.0359202	-0.0613979	-0.00307876	-0.0374067	-0.0622853	-0.00582251	-0.0170767	-0.0352295
0.62	-0.00361838	-0.0380327	-0.0640787	-0.00269893	-0.0384878	-0.0633642	-0.00562645	-0.0221781	-0.0427762
0.63	-0.00322957	-0.0396671	-0.0659949	-0.00231104	-0.0390172	-0.0635818	-0.00537875	-0.0273954	-0.0504218
0.64	-0.00282689	-0.0408047	-0.0671256	-0.00192065	-0.0389874	-0.0629355	-0.00507859	-0.0326579	-0.0580561
0.65	-0.00241536	-0.041437	-0.0674652	-0.00153333	-0.0384045	-0.0614428	-0.0047259	-0.0378877	-0.0655594
0.66	-0.00200003	-0.0415654	-0.0670238	-0.00115454	-0.0372868	-0.0591405	-0.00432142	-0.0430013	-0.0728042
0.67	-0.00158589	-0.0412011	-0.0658262	-0.000789472	-0.0356655	-0.0560845	-0.00386674	-0.0479115	-0.0796588
0.68	-0.00117777	-0.0403644	-0.063911	-0.000442964	-0.0335829	-0.0523475	-0.00336436	-0.0525294	-0.0859904
0.69	-0.000780277	-0.0390837	-0.0613292	-0.000119372	-0.031092	-0.0480175	-0.00281762	-0.0567668	-0.0916684
0.7	-0.000397657	-0.0373952	-0.0581428	0.000177524	-0.0282546	-0.0431955	-0.00223077	-0.0605389	-0.0965686
0.71	-3.37879e-05	-0.0353413	-0.0544232	0.000444599	-0.0251398	-0.0379926	-0.00160885	-0.0637662	-0.100577
0.72	0.000307914	-0.0329701	-0.0502494	0.000679448	-0.0218224	-0.0325276	-0.00095769	-0.066378	-0.103593
0.73	0.000624533	-0.0303337	-0.0457065	0.000880435	-0.0183806	-0.0269234	-0.000283743	-0.068314	-0.105535
0.74	0.000913694	-0.0274879	-0.0408834	0.00104672	-0.0148946	-0.0213045	0.000405983	-0.0695269	-0.10634
0.75	0.00117359	-0.0244901	-0.0358716	0.00117825	-0.011444	-0.0157935	0.00110408	-0.0699847	-0.10597
0.76	0.00140299	-0.0213992	-0.0307634	0.00127578	-0.00810617	-0.0105083	0.00180291	-0.0696715	-0.104413
0.77	0.00160126	-0.0182737	-0.0256499	0.0013408	-0.00495429	-0.00555923	0.00249475	-0.0685898	-0.101685
0.78	0.00176835	-0.0151716	-0.0206203	0.00137551	-0.0020558	-0.00104659	0.00317202	-0.0667602	-0.0978279
0.79	0.00190476	-0.0121487	-0.0157599	0.00138276	0.000529311	0.00294165	0.0038274	-0.0642222	-0.0929151
0.8	0.00201157	-0.00925863	-0.0111493	0.00136595	0.00274967	0.00633173	0.00445409	-0.0610338	-0.0870456
0.81	0.00209035	-0.00655139	-0.00686315	0.00132893	0.00456364	0.0090655	0.00504596	-0.0572701	-0.0803448
0.82	0.00214316	-0.0040732	-0.00296929	0.00127594	0.00594004	0.0111015	0.00559769	-0.0530224	-0.0729611
0.83	0.00217252	-0.00186571	0.000472012	0.00121146	0.00685863	0.0124155	0.00610495	-0.0483957	-0.0650627
0.84	0.00218131	3.43959e-05	0.00340877	0.00114013	0.00731033	0.0130007	0.00656453	-0.0435062	-0.0568334
0.85	0.00217276	0.00159586	0.00579788	0.00106661	0.00729711	0.0128673	0.00697442	-0.0384785	-0.0484679
0.86	0.00215041	0.00279322	0.00760558	0.000995498	0.00683158	0.0120417	0.00733388	-0.0334421	-0.0401666
0.87	0.00211798	0.00360711	0.00880784	0.000931214	0.0059364	0.0105656	0.00764347	-0.0285279	-0.0321298
0.88	0.00207939	0.00402453	0.00939065	0.000877901	0.00464339	0.00849429	0.00790508	-0.0238641	-0.0245524
0.89	0.00203864	0.00403906	0.00935031	0.000839344	0.00299248	0.00589512	0.00812181	-0.0195732	-0.0176176
0.9	0.00199976	0.00365099	0.00869346	0.000818893	0.00103049	0.00284521	0.00829796	-0.0157676	-0.0114917
0.91	0.00196674	0.00286746	0.00743722	0.000819401	-0.00119028	-0.000570578	0.00843891	-0.0125461	-0.00631882
0.92	0.00194348	0.00170242	0.00560908	0.000843177	-0.00361344	-0.00426194	0.00855092	-0.00999154	-0.00221634
0.93	0.0019337	0.000176663	0.00324671	0.000891952	-0.00618003	-0.0081355	0.00864098	-0.00816709	0.000729067
0.94	0.00194086	-0.00168237	0.000397684	0.00096686	-0.00883002	-0.0120972	0.00871664	-0.00711473	0.00246447
0.95	0.00196815	-0.00384081	-0.00288101	0.00106844	-0.0115038	-0.0160543	0.00878572	-0.00685345	0.00297273
0.96	0.00201835	-0.00625869	-0.00652359	0.00119662	-0.0141434	-0.0199181	0.00885614	-0.00737837	0.00227348
0.97	0.00209384	-0.00889044	-0.0104563	0.00135081	-0.0166942	-0.0236052	0.00893562	-0.00866064	0.000423055
0.98	0.00219651	-0.0116855	-0.0145984	0.00152985	-0.0191056	-0.0270397	0.00903151	-0.010648	-0.00248684
0.99	0.00232772	-0.014589	-0.0188635	0.00173211	-0.0213325	-0.0301544	0.00915049	-0.013266	-0.00633148
1	0.00248826	-0.0175428	-0.0231608	0.00195556	-0.0233356	-0.0328924	0.00929842	-0.0164202	-0.0109566
1.01	0.00267834	-0.0204861	-0.0273966	0.00219777	-0.0250828	-0.0352077	0.00948012	-0.019999	-0.0161829
1.02	0.00289754	-0.0233573	-0.0314766	0.00245608	-0.0265489	-0.0370659	0.00969921	-0.0238765	-0.0218113
1.03	0.00314484	-0.0260946	-0.0353073	0.00272756	-0.0277165	-0.0384445	0.009958	-0.0279167	-0.0276288
1.04	0.00341859	-0.0286376	-0.0387984	0.00300918	-0.0285758	-0.0393332	0.0102574	-0.0319773	-0.0334153
1.05	0.00371656	-0.0309287	-0.0418649	0.00329784	-0.0291245	-0.0397332	0.0105969	-0.0359145	-0.0389502
1.06	0.00403595	-0.0329148	-0.044429	0.00359046	-0.0293677	-0.0396572	0.0109746	-0.0395872	-0.0440194
1.07	0.00437348	-0.0345483	-0.0464228	0.00388402	-0.0293174	-0.0391283	0.0113872	-0.0428615	-0.048422
1.08	0.00472541	-0.0357889	-0.0477899	0.00417569	-0.0289922	-0.0381792	0.0118299	-0.0456151	-0.0519772
1.09	0.00508765	-0.0366046	-0.0484876	0.00446283	-0.0284161	-0.0368511	0.0122972	-0.0477413	-0.0545294
1.1	0.00545582	-0.0369732	-0.0484882	0.00474308	-0.0276183	-0.0351927	0.0127822	-0.0491523	-0.055954
1.11	0.00582538	-0.036883	-0.0477809	0.00501437	-0.0266323	-0.0332583	0.0132774	-0.0497824	-0.0561614
1.12	0.00619175	-0.0363338	-0.0463724	0.00527502	-0.0254947	-0.0311071	0.0137749	-0.04959	-0.0551001
1.13	0.00655037	-0.0353373	-0.0442876	0.0055237	-0.0242445	-0.0288013	0.0142662	-0.0485593	-0.0527585
1.14	0.00689688	-0.0339171	-0.0415696	0.00575948	-0.0229225	-0.0264046	0.0147431	-0.0467008	-0.0491658
1.15	0.00722722	-0.0321089	-0.0382796	0.00598185	-0.0215696	-0.0239812	0.0151974	-0.0440515	-0.0443909
1.16	0.00753773	-0.0299599	-0.0344957	0.00619071	-0.0202269	-0.0215942	0.0156215	-0.0406733	-0.0385413
1.17	0.00782528	-0.0275277	-0.0303115	0.00638636	-0.018934	-0.019304	0.0160085	-0.0366518	-0.0317588
1.18	0.00808737	-0.0248795	-0.0258341	0.00656948	-0.0177285	-0.0171678	0.0163526	-0.032093	-0.0242161
1.19	0.0083222	-0.0220903	-0.0211817	0.00674114	-0.0166456	-0.0152376	0.0166488	-0.0271209	-0.016111
1.2	0.00852878	-0.0192411	-0.0164805	0.00690271	-0.0157168	-0.0135601	0.0168939	-0.0218729	-0.00766006
1.21	0.00870691	-0.0164169	-0.0118616	0.00705588	-0.0149697	-0.0121751	0.0170857	-0.0164957	0.000907654
1.22	0.00885729	-0.0137043	-0.00745696	0.00720259	-0.0144275	-0.0111152	0.0172237	-0.0111407	0.00935841
1.23	0.00898146	-0.0111889	-0.00339613	0.00734498	-0.0141082	-0.010405	0.0173088	-0.00595921	0.017461
1.24	0.00908181	-0.00895306	0.000198068	0.00748535	-0.0140249	-0.0100609	0.0173437	-0.00109755	0.0249941
1.25	0.00916151	-0.00707289	0.00321326	0.00762609	-0.0141848	-0.0100903	0.0173321	0.00330767	0.0317535
1.26	0.00922448	-0.00561614	0.00555129	0.00776966	-0.0145895	-0.0104921	0.0172793	0.00713385	0.0375587
1.27	0.00927524	-0.00463966	0.00713166	0.00791849	-0.0152349	-0.011256	0.0171915	0.0102764	0.0422583
1.28	0.00931883	-0.00418733	0.00789461	0.00807494	-0.0161111	-0.0123634	0.0170761	0.0126519	0.0457355
1.29	0.00936064	-0.0042883	0.0078036	0.00824124	-0.0172027	-0.0137868	0.0169411	0.0142012	0.0479112
1.3	0.00940628	-0.00495555	0.00684729	0.00841944	-0.0184887	-0.0154911	0.0167948	0.0148907	0.0487469
1.31	0.00946143	-0.00618497	0.0050407	0.00861138	-0.0199433	-0.0174337	0.0166459	0.0147138	0.0482458
1.32	0.00953159	-0.00795489	0.00242569	0.00881857	-0.0215358	-0.019565	0.0165031	0.013691	0.0464525
1.33	0.009622	-0.0102261	-0.000929455	0.00904224	-0.0232317	-0.02183	0.0163746	0.0118689	0.0434515
1.34	0.0097374	-0.0129427	-0.0049312	0.00928323	-0.0249927	-0.0241684	0.016268	0.00931882	0.0393643
1.35	0.00988191	-0.0160327	-0.0094628	0.00954198	-0.0267776	-0.0265163	0.0161901	0.00613444	0.0343455
1.36	0.0100588	-0.0194105	-0.0143872	0.00981852	-0.0285431	-0.0288071	0.0161468	0.00242843	0.0285774
1.37	0.0102706	-0.0229783	-0.0195504	0.0101124	-0.0302449	-0.030973	0.0161427	-0.00167115	0.0222639
1.38	0.0105185	-0.0266293	-0.0247859	0.0104229	-0.0318377	-0.0329459	0.0161809	-0.00602516	0.0156243
1.39	0.0108028	-0.0302504	-0.0299193	0.0107485	-0.0332771	-0.0346594	0.0162634	-0.010488	0.00888521
1.4	0.0111228	-0.0337254	-0.0347732	0.0110875	-0.0345199	-0.0360498	0.0163904	-0.0149123	0.00227397
1.41	0.0114763	-0.0369387	-0.0391729	0.0114379	-0.0355252	-0.0370575	0.0165608	-0.0191539	-0.00398938
1.42	0.0118601	-0.0397786	-0.0429515	0.0117969	-0.0362556	-0.0376287	0.0167722	-0.0230765	-0.00969892
1.43	0.0122701	-0.0421411	-0.0459555	0.0121618	-0.0366775	-0.0377164	0.0170207	-0.0265559	-0.0146696
1.44	0.0127008	-0.0439329	-0.0480493	0.0125292	-0.0367625	-0.037282	0.0173013	-0.0294842	-0.018743
1.45	0.0131464	-0.0450746	-0.0491203	0.0128956	-0.036488	-0.036296	0.017608	-0.0317731	-0.0217925
1.46	0.0135998	-0.0455035	-0.0490827	0.0132575	-0.035838	-0.0347392	0.0179342	-0.0333564	-0.0237265
1.47	0.0140537	-0.0451761	-0.0478806	0.0136109	-0.0348031	-0.0326034	0.0182725	-0.0341922	-0.024492
1.48	0.0145005	-0.0440691	-0.0454902	0.0139521	-0.0333819	-0.0298921	0.0186153	-0.0342638	-0.0240746
1.49	0.0149323	-0.0421813	-0.0419216	0.0142771	-0.0315804	-0.0266205	0.018955	-0.0335799	-0.0224998
1.5	0.0153414	-0.0395337	-0.0372189	0.0145822	-0.0294126	-0.0228159	0.0192843	-0.0321739	-0.0198303
1.51	0.0157204	-0.036169	-0.0314594	0.014864	-0.0269001	-0.0185171	0.0195961	-0.0301027	-0.0161641
1.52	0.0160624	-0.0321511	-0.0247519	0.015119	-0.0240724	-0.0137744	0.0198842	-0.0274439	-0.0116304
1.53	0.0163613	-0.0275633	-0.0172338	0.0153443	-0.0209657	-0.00864834	0.0201431	-0.024293	-0.0063845
1.54	0.0166119	-0.0225057	-0.00906747	0.0155373	-0.0176231	-0.00320881	0.0203686	-0.0207599	-0.000602137
1.55	0.01681	-0.0170931	-0.000435446	0.015696	-0.0140929	0.00246619	0.0205573	-0.0169647	0.00552701
1.56	0.0169528	-0.0114507	0.00846472	0.0158185	-0.0104286	0.0082922	0.0207072	-0.0130332	0.0118062
1.57	0.0170385	-0.00571134	0.0174264	0.0159041	-0.00668704	0.01418	0.0208177	-0.0090925	0.0180388
1.58	0.017067	-1.07406e-05	0.0262403	0.015952	-0.00292748	0.0200378	0.0208892	-0.00526655	0.0240349
1.59	0.0170391	0.00551621	0.0347005	0.0159626	0.000789698	0.0257727	0.0209236	-0.00167151	0.0296186
1.6	0.0169574	0.0107398	0.0426111	0.0159364	0.00440447	0.0312936	0.0209236	0.00158821	0.0346336
1.61	0.0168256	0.0155394	0.0497922	0.0158748	0.00785851	0.0365128	0.0208931	0.00442354	0.0389486
1.62	0.0166482	0.0198073	0.0560855	0.0157797	0.0110966	0.0413483	0.0208366	0.00676377	0.0424621
1.63	0.0164313	0.0234523	0.0613594	0.0156536	0.0140682	0.0457258	0.0207594	0.0085589	0.0451051
1.64	0.0161813	0.0264022	0.065513	0.0154992	0.0167282	0.0495806	0.0206671	0.00978119	0.0468436
1.65	0.0159055	0.0286061	0.0684795	0.01532	0.0190385	0.0528593	0.0205655	0.0104258	0.047679
1.66	0.0156116	0.0300365	0.0702278	0.0151195	0.0209691	0.055521	0.0204603	0.0105109	0.0476479
1.67	0.0153072	0.0306895	0.0707642	0.0149017	0.0224985	0.0575388	0.0203568	0.0100763	0.0468201
1.68	0.0150001	0.0305852	0.0701312	0.0146707	0.0236143	0.0589	0.0202601	0.00918196	0.0452955
1.69	0.0146977	0.0297668	0.0684069	0.0144306	0.024314	0.0596071	0.0201743	0.0079056	0.0431998
1.7	0.0144067	0.0282994	0.0657017	0.0141856	0.0246047	0.0596774	0.0201028	0.00633922	0.04068
1.71	0.0141334	0.0262673	0.0621548	0.0139397	0.0245031	0.0591427	0.0200479	0.00458566	0.0378978
1.72	0.0138828	0.0237714	0.0579295	0.0136966	0.024035	0.0580487	0.0200111	0.00275448	0.035024
1.73	0.0136589	0.0209259	0.0532074	0.0134599	0.0232349	0.0564535	0.0199925	0.000957691	0.0322311
1.74	0.0134648	0.0178541	0.0481829	0.0132327	0.0221447	0.0544268	0.0199913	-0.000694638	0.0296871
1.75	0.013302	0.0146845	0.043056	0.0130176	0.0208131	0.0520472	0.0200054	-0.00209863	0.0275489
1.76	0.0131708	0.011546	0.0380259	0.0128168	0.0192938	0.049401	0.0200319	-0.00316064	0.0259558
1.77	0.0130703	0.00856419	0.0332839	0.012632	0.0176446	0.0465793	0.020067	-0.00380091	0.0250248
1.78	0.0129984	0.00585652	0.0290076	0.012464	0.0159256	0.0436763	0.0201061	-0.00395671	0.0248452
1.79	0.0129517	0.00352859	0.0253544	0.0123133	0.0141977	0.0407861	0.0201442	-0.00358474	0.0254761
1.8	0.0129261	0.0016706	0.0224564	0.0121797	0.012521	0.0380009	0.0201758	-0.00266292	0.0269429
1.81	0.0129163	0.000354296	0.0204163	0.0120623	0.0109532	0.0354084	0.0201954	-0.00119132	0.0292371
1.82	0.0129168	-0.000369315	0.0193038	0.0119598	0.00954824	0.0330894	0.0201977	0.00080778	0.0323161
1.83	0.0129214	-0.000471594	0.0191536	0.0118704	0.008355	0.031116	0.0201774	0.00329062	0.0361047
1.84	0.012924	5.29398e-05	0.0199645	0.0117917	0.00741585	0.0295501	0.0201302	0.00619356	0.0404982
1.85	0.0129182	0.00118663	0.0216997	0.011721	0.00676587	0.0284413	0.0200522	0.00943537	0.0453656
1.86	0.0128981	0.00288957	0.0242888	0.0116551	0.00643201	0.0278264	0.0199405	0.0129203	0.0505552
1.87	0.0128585	0.00510121	0.0276303	0.011591	0.00643259	0.0277286	0.0197932	0.0165418	0.0558999
1.88	0.0127945	0.00774284	0.0315959	0.0115251	0.006777	0.0281571	0.0196094	0.0201861	0.0612239
1.89	0.0127023	0.0107206	0.0360352	0.0114541	0.00746572	0.0291074	0.0193896	0.0237372	0.0663489
1.9	0.0125791	0.0139292	0.040782	0.0113745	0.00849059	0.0305617	0.0191352	0.0270809	0.0711016
1.91	0.0124231	0.0172558	0.0456599	0.011283	0.00983526	0.0324897	0.0188488	0.0301093	0.0753201
1.92	0.0122338	0.0205846	0.0504899	0.0111766	0.011476	0.0348501	0.0185342	0.0327251	0.0788604
1.93	0.0120116	0.0238011	0.0550964	0.0110524	0.0133825	0.0375921	0.0181958	0.0348457	0.0816023
1.94	0.0117583	0.0267963	0.0593148	0.010908	0.0155191	0.040657	0.0178389	0.0364063	0.0834542
1.95	0.0114766	0.0294717	0.0629972	0.0107412	0.0178459	0.0439802	0.0174695	0.0373627	0.0843572
1.96	0.01117	0.031742	0.0660185	0.0105504	0.0203203	0.0474934	0.0170936	0.0376937	0.0842881
1.97	0.0108431	0.0335396	0.0682811	0.0103343	0.0228979	0.0511264	0.0167175	0.0374018	0.0832604
1.98	0.0105008	0.0348165	0.0697189	0.0100921	0.0255342	0.0548096	0.0163473	0.036514	0.0813251
1.99	0.0101484	0.0355465	0.0702998	0.00982335	0.0281858	0.0584756	0.0159888	0.0350811	0.0785691
2	0.00979148	0.0357265	0.0700276	0.00952823	0.0308115	0.0620611	0.0156471	0.0331761	0.0751126
2.01	0.00943544	0.0353766	0.0688391	0.00920714	0.0333733	0.0654058	0.0153264	0.0308924	0.0710033
2.02	0.00908537	0.0345398	0.0669105	0.00886089	0.0358375	0.0685616	0.0150299	0.0283403	0.0665183
2.03	0.00874586	0.0332799	0.0643473	0.00849061	0.038175	0.0714856	0.0147599	0.0256434	0.0618512
2.04	0.00842071	0.0316799	0.061283	0.0080977	0.0403624	0.0741438	0.0145169	0.0229347	0.0572076
2.05	0.00811287	0.0298385	0.0578738	0.00768373	0.0423815	0.0765106	0.0143006	0.0203514	0.0527978
2.06	0.00782419	0.0278664	0.0542933	0.00725047	0.0442196	0.0785694	0.0141088	0.0180304	0.0488296
2.07	0.00755538	0.0258825	0.0507249	0.00679977	0.0458698	0.0803121	0.0139384	0.0161034	0.0455002
2.08	0.00730597	0.0240084	0.0473555	0.00633352	0.0473296	0.0817382	0.0137848	0.0146916	0.0429894
2.09	0.00707425	0.0223647	0.0443676	0.00585361	0.0486013	0.0828538	0.0136423	0.0139016	0.0414523
2.1	0.00685733	0.0210652	0.0419321	0.0053619	0.0496906	0.0836706	0.0135042	0.0138211	0.0410134
2.11	0.00665126	0.0202127	0.040201	0.00486018	0.050606	0.0842044	0.0133631	0.0145153	0.0417617
2.12	0.0064511	0.0198946	0.039301	0.00435013	0.0513578	0.0844738	0.013211	0.0160239	0.0437461
2.13	0.00625116	0.0201787	0.0393281	0.00383333	0.0519574	0.0844985	0.0130397	0.0183596	0.0469733
2.14	0.00604517	0.0211106	0.0403422	0.00331126	0.0524157	0.0842979	0.0128409	0.0215065	0.0514064
2.15	0.00582652	0.0227105	0.0423646	0.00278526	0.0527431	0.0838898	0.0126068	0.0254203	0.0569648
2.16	0.00558855	0.024972	0.0453752	0.00225661	0.052948	0.0832892	0.01233	0.0300288	0.0635264
2.17	0.00532479	0.0278616	0.0493124	0.00172649	0.0530365	0.0825071	0.0120041	0.0352341	0.0709305
2.18	0.00502923	0.0313186	0.0540736	0.00119606	0.0530115	0.0815501	0.0116236	0.0409149	0.0789822
2.19	0.00469662	0.0352569	0.0595182	0.000666444	0.052873	0.0804196	0.0111844	0.0469302	0.0874584
2.2	0.00432266	0.0395671	0.0654715	0.000138794	0.0526175	0.0791123	0.0106842	0.0531233	0.0961141
2.21	0.00390427	0.0441198	0.0717293	-0.000385691	0.0522384	0.0776195	0.0101217	0.0593271	0.104691
2.22	0.00343974	0.0487694	0.0780654	-0.000905726	0.051726	0.0759287	0.00949797	0.0653686	0.112923
2.23	0.00292888	0.0533593	0.0842382	-0.00141992	0.0510686	0.0740236	0.0088153	0.0710748	0.120549
2.24	0.0023731	0.0577264	0.0899993	-0.00192677	0.0502524	0.0718857	0.00807795	0.0762782	0.127317
2.25	0.00177544	0.0617076	0.0951021	-0.00242459	0.0492633	0.0694955	0.00729174	0.0808221	0.132996
2.26	0.00114057	0.0651447	0.0993106	-0.0029116	0.0480872	0.0668343	0.00646398	0.0845659	0.137379
2.27	0.000474659	0.0678905	0.102408	-0.00338587	0.0467113	0.0638853	0.0056033	0.0873896	0.140297
2.28	-0.000214697	0.0698142	0.104204	-0.00384533	0.0451255	0.0606361	0.00471939	0.0891978	0.141616
2.29	-0.000918715	0.0708067	0.104546	-0.00428785	0.0433228	0.0570795	0.00382276	0.0899234	0.141251
2.3	-0.00162764	0.0707843	0.103318	-0.00471125	0.0413014	0.0532156	0.00292446	0.0895297	0.13916
2.31	-0.00233103	0.0696932	0.100455	-0.00511335	0.0390646	0.0490533	0.00203572	0.088012	0.135356
2.32	-0.00301806	0.0675117	0.0959389	-0.00549205	0.0366224	0.0446108	0.00116768	0.0853983	0.129896
2.33	-0.00367786	0.064252	0.0898063	-0.00584537	0.0339914	0.0399169	0.000331019	0.0817483	0.122891
2.34	-0.00429986	0.0599609	0.0821452	-0.00617153	0.0311957	0.0350115	-0.000464326	0.0771527	0.114495
2.35	-0.00487411	0.0547194	0.0730953	-0.00646903	0.0282667	0.0299452	-0.00120947	0.0717302	0.104904
2.36	-0.00539165	0.0486406	0.0628445	-0.00673674	0.0252433	0.0247794	-0.00189684	0.065624	0.0943494
2.37	-0.0058448	0.0418674	0.0516245	-0.00697393	0.0221708	0.019585	-0.00252041	0.0589984	0.0830943
2.38	-0.00622744	0.0345685	0.0397042	-0.00718036	0.0191008	0.0144417	-0.00307587	0.0520334	0.0714219
2.39	-0.00653524	0.0269339	0.0273826	-0.00735634	0.0160896	0.00943586	-0.00356078	0.0449201	0.0596298
2.4	-0.00676588	0.0191693	0.0149796	-0.00750275	0.0131977	0.00465885	-0.00397463	0.0378546	0.0480205
2.41	-0.00691911	0.0114899	0.00282686	-0.00762109	0.0104873	0.000204497	-0.00431888	0.0310325	0.0368928
2.42	-0.00699688	0.00411438	-0.00874231	-0.00771351	0.00802182	-0.00383337	-0.00459692	0.0246435	0.0265333
2.43	-0.00700332	-0.00274201	-0.0194031	-0.00778275	0.00586306	-0.00736362	-0.00481398	0.0188657	0.0172077
2.44	-0.00694466	-0.00887401	-0.0288492	-0.00783218	0.00407009	-0.0103007	-0.00497701	0.0138604	0.00915393
2.45	-0.00682909	-0.0140927	-0.0368027	-0.00786575	0.0026971	-0.0125672	-0.00509443	0.00976797	0.00257468
2.46	-0.0066666	-0.0182313	-0.0430225	-0.00788788	0.0017917	-0.0140967	-0.00517599	0.00670371	-0.00236762
2.47	-0.00646872	-0.0211509	-0.0473122	-0.00790347	0.00139325	-0.0148362	-0.00523242	0.00475478	-0.00555535
2.48	-0.00624821	-0.0227441	-0.0495266	-0.00791773	0.00153141	-0.0147482	-0.00527519	0.00397806	-0.00691866
2.49	-0.0060187	-0.0229393	-0.0495764	-0.00793615	0.00222486	-0.0138122	-0.00531617	0.00439883	-0.00643693
2.5	-0.00579439	-0.0217027	-0.0474314	-0.0079643	0.00348037	-0.0120266	-0.00536734	0.00601046	-0.00413878
2.51	-0.0055896	-0.0190395	-0.0431217	-0.0080078	0.00529216	-0.00940869	-0.00544042	0.008775	-0.00010065
2.52	-0.00541841	-0.0149941	-0.0367372	-0.00807213	0.00764164	-0.00599563	-0.00554665	0.0126248	0.00555609
2.53	-0.00529426	-0.00964884	-0.0284253	-0.00816252	0.0104975	-0.00184358	-0.00569642	0.0174648	0.0126693
2.54	-0.00522957	-0.00312147	-0.0183862	-0.00828383	0.0138163	0.00297303	-0.00589905	0.0231758	0.0210412
2.55	-0.00523547	0.00443812	-0.00686771	-0.00844041	0.0175431	0.00836308	-0.00616257	0.0296184	0.0304448
2.56	-0.00532139	0.0128525	0.00584275	-0.00863603	0.0216129	0.0142208	-0.00649353	0.036637	0.040631
2.57	-0.0054949	0.021922	0.0194263	-0.00887376	0.0259521	0.0204282	-0.00689687	0.0440651	0.0513357
2.58	-0.00576149	0.0314306	0.0335422	-0.0091559	0.0304804	0.0268583	-0.00737581	0.0517296	0.0622879
2.59	-0.00612442	0.0411526	0.0478382	-0.00948391	0.0351129	0.033378	-0.00793186	0.0594564	0.0732173
2.6	-0.00658468	0.0508591	0.0619606	-0.00985841	0.0397622	0.039852	-0.00856478	0.0670751	0.0838621
2.61	-0.00714099	0.060325	0.0755651	-0.0102791	0.0443408	0.0461462	-0.00927266	0.0744238	0.093976
2.62	-0.00778986	0.0693356	0.0883267	-0.0107449	0.0487636	0.0521314	-0.010052	0.081353	0.103335
2.63	-0.00852572	0.0776926	0.0999491	-0.0112538	0.0529503	0.057687	-0.0108981	0.0877302	0.111742
2.64	-0.00934114	0.0852202	0.110173	-0.0118031	0.0568274	0.0627041	-0.0118046	0.0934423	0.119032
2.65	-0.0102271	0.0917696	0.118783	-0.0123893	0.0603304	0.0670889	-0.0127646	0.0983987	0.125078
2.66	-0.0111731	0.0972232	0.125616	-0.0130084	0.0634055	0.0707647	-0.01377	0.102532	0.129788
2.67	-0.0121678	0.101498	0.130559	-0.013656	0.0660114	0.0736749	-0.0148125	0.105802	0.133112
2.68	-0.0131991	0.104545	0.133558	-0.0143272	0.0681199	0.0757836	-0.0158833	0.10819	0.135036
2.69	-0.0142547	0.106355	0.134616	-0.0150169	0.0697171	0.0770772	-0.0169736	0.109704	0.135586
2.7	-0.0153224	0.106953	0.13379	-0.01572	0.0708036	0.0775644	-0.0180748	0.110376	0.134823
2.71	-0.0163902	0.106398	0.131191	-0.0164315	0.0713942	0.0772759	-0.0191787	0.110257	0.132838
2.72	-0.017447	0.104783	0.126978	-0.0171466	0.0715176	0.0762631	-0.0202777	0.109417	0.129753
2.73	-0.0184829	0.102228	0.121351	-0.0178607	0.0712151	0.0745965	-0.0213651	0.107943	0.12571
2.74	-0.0194891	0.0988759	0.114544	-0.0185698	0.0705397	0.0723639	-0.022435	0.105933	0.120869
2.75	-0.0204585	0.0948902	0.106818	-0.0192706	0.0695539	0.0696666	-0.0234826	0.103493	0.115401
2.76	-0.0213856	0.090446	0.0984519	-0.0199603	0.0683282	0.0666173	-0.024504	0.100734	0.109483
2.77	-0.0222667	0.0857255	0.0897315	-0.0206368	0.0669385	0.0633359	-0.0254968	0.0977699	0.103292
2.78	-0.0231	0.0809121	0.0809418	-0.021299	0.0654637	0.0599458	-0.0264593	0.0947098	0.0970007
2.79	-0.0238854	0.076184	0.0723569	-0.0219463	0.0639837	0.0565705	-0.0273912	0.0916582	0.0907698
2.8	-0.0246247	0.0717089	0.0642322	-0.0225791	0.0625765	0.0533293	-0.028293	0.0887111	0.0847458
2.81	-0.0253211	0.0676385	0.0567959	-0.0231985	0.0613157	0.0503341	-0.0291662	0.0859531	0.0790567
2.82	-0.0259794	0.0641042	0.0502432	-0.0238063	0.0602687	0.0476857	-0.0300131	0.0834559	0.0738094
2.83	-0.0266055	0.0612136	0.0447303	-0.024405	0.0594943	0.0454707	-0.0308366	0.0812766	0.0690872
2.84	-0.0272063	0.0590471	0.0403705	-0.0249975	0.0590411	0.0437595	-0.03164	0.0794571	0.0649493
2.85	-0.0277893	0.0576568	0.0372321	-0.0255872	0.0589461	0.0426035	-0.0324272	0.0780236	0.0614303
2.86	-0.0283623	0.057065	0.0353375	-0.0261779	0.0592335	0.0420343	-0.033202	0.0769869	0.0585409
2.87	-0.0289334	0.0572648	0.0346637	-0.0267734	0.0599141	0.0420627	-0.0339685	0.0763435	0.0562693
2.88	-0.0295103	0.0582213	0.0351451	-0.0273776	0.0609853	0.0426784	-0.0347304	0.0760763	0.0545836
2.89	-0.0301004	0.0598734	0.0366765	-0.0279945	0.0624308	0.0438507	-0.0354913	0.076157	0.0534343
2.9	-0.03071	0.0621371	0.0391186	-0.0286276	0.0642219	0.0455298	-0.0362547	0.0765472	0.0527577
2.91	-0.031345	0.064909	0.0423036	-0.0292802	0.0663181	0.047648	-0.0370234	0.0772015	0.0524792
2.92	-0.0320097	0.0680706	0.0460423	-0.029955	0.0686682	0.0501228	-0.0377997	0.0780691	0.0525171
2.93	-0.0327075	0.0714928	0.0501313	-0.0306544	0.0712126	0.0528588	-0.0385855	0.0790967	0.0527865
2.94	-0.0334402	0.0750411	0.0543604	-0.0313799	0.073885	0.0557514	-0.0393821	0.0802303	0.0532023
2.95	-0.0342084	0.0785803	0.0585207	-0.0321325	0.076614	0.0586896	-0.0401905	0.0814181	0.0536835
2.96	-0.0350115	0.0819791	0.0624116	-0.0329123	0.0793262	0.0615598	-0.0410107	0.0826116	0.0541552
2.97	-0.0358473	0.0851151	0.0658478	-0.0337189	0.0819477	0.0642495	-0.0418428	0.0837681	0.0545518
2.98	-0.0367128	0.0878787	0.0686655	-0.0345509	0.0844068	0.0666502	-0.042686	0.0848516	0.0548189
2.99	-0.0376036	0.0901764	0.0707275	-0.0354064	0.086636	0.0686609	-0.0435397	0.0858339	0.0549142
3	-0.0385147	0.091934	0.0719272	-0.0362829	0.0885738	0.0701911	-0.0444025	0.086695	0.054809
3.01	-0.0394405	0.0930982	0.0721915	-0.037177	0.0901666	0.0711635	-0.0452733	0.0874239	0.0544882
3.02	-0.0403748	0.0936383	0.0714824	-0.0380851	0.0913703	0.0715157	-0.0461507	0.0880178	0.0539493
3.03	-0.0413113	0.0935461	0.0697972	-0.0390032	0.0921512	0.0712022	-0.0470334	0.0884816	0.0532023
3.04	-0.0422438	0.0928359	0.0671673	-0.0399268	0.092487	0.0701951	-0.0479202	0.0888276	0.0522678
3.05	-0.0431663	0.0915427	0.0636561	-0.0408516	0.0923669	0.0684851	-0.0488098	0.0890737	0.0511752
3.06	-0.0440731	0.0897208	0.0593554	-0.0417728	0.0917921	0.0660809	-0.0497016	0.0892426	0.0499605
3.07	-0.0449594	0.0874405	0.0543812	-0.0426861	0.0907752	0.0630088	-0.0505947	0.0893599	0.0486644
3.08	-0.0458209	0.0847854	0.0488686	-0.0435871	0.0893398	0.0593118	-0.0514889	0.0894529	0.0473293
3.09	-0.0466543	0.0818488	0.0429658	-0.0444718	0.0875193	0.0550473	-0.052384	0.0895488	0.0459971
3.1	-0.0474574	0.0787293	0.0368286	-0.0453366	0.0853556	0.0502857	-0.0532801	0.0896732	0.0447072
3.11	-0.0482288	0.0755279	0.0306139	-0.0461782	0.0828982	0.0451078	-0.0541778	0.0898489	0.0434939
3.12	-0.0489682	0.072343	0.024474	-0.0469939	0.080202	0.0396022	-0.0550775	0.0900946	0.0423852
3.13	-0.0496763	0.0692677	0.0185509	-0.0477818	0.0773258	0.0338625	-0.0559802	0.0904241	0.0414009
3.14	-0.0503544	0.0663858	0.0129713	-0.0485403	0.0743303	0.0279847	-0.0568865	0.0908453	0.040552
3.15	-0.0510051	0.0637693	0.00784235	-0.0492684	0.071277	0.0220645	-0.0577976	0.0913602	0.0398399
3.16	-0.0516311	0.0614758	0.00324832	-0.049966	0.0682256	0.0161943	-0.0587142	0.0919643	0.0392566
3.17	-0.052236	0.0595474	-0.000751741	-0.0506333	0.0652331	0.0104612	-0.0596373	0.0926474	0.0387848
3.18	-0.0528235	0.0580088	-0.00412527	-0.0512712	0.0623521	0.00494496	-0.0605676	0.0933936	0.0383991
3.19	-0.0533977	0.0568679	-0.00686634	-0.0518811	0.0596297	-0.000284154	-0.0615055	0.0941823	0.0380668
3.2	-0.0539624	0.0561159	-0.00899468	-0.0524647	0.0571066	-0.00516634	-0.0624515	0.094989	0.03775
3.21	-0.0545214	0.0557282	-0.0105537	-0.0530242	0.0548162	-0.00965334	-0.0634055	0.0957866	0.0374069
3.22	-0.0550782	0.0556666	-0.0116076	-0.0535621	0.0527846	-0.0137089	-0.0643673	0.0965466	0.0369939
3.23	-0.0556359	0.0558815	-0.0122376	-0.054081	0.0510303	-0.0173088	-0.0653364	0.0972404	0.0364678
3.24	-0.0561968	0.0563142	-0.0125373	-0.0545838	0.0495641	-0.0204406	-0.066312	0.0978408	0.0357879
3.25	-0.0567629	0.0569008	-0.0126083	-0.0550735	0.0483901	-0.0231026	-0.067293	0.0983229	0.0349178
3.26	-0.0573353	0.0575747	-0.0125547	-0.0555528	0.0475057	-0.0253033	-0.0682782	0.0986659	0.0338272
3.27	-0.0579146	0.0582706	-0.012478	-0.0560247	0.0469029	-0.0270592	-0.069266	0.0988536	0.0324937
3.28	-0.0585008	0.0589271	-0.0124723	-0.0564919	0.046569	-0.0283942	-0.0702549	0.0988756	0.0309036
3.29	-0.0590931	0.0594905	-0.0126193	-0.0569571	0.046488	-0.0293371	-0.0712431	0.0987277	0.0290532
3.3	-0.0596903	0.0599171	-0.0129844	-0.0574227	0.0466413	-0.0299202	-0.0722291	0.0984126	0.026949
3.31	-0.060291	0.0601758	-0.0136131	-0.0578909	0.047009	-0.0301773	-0.0732111	0.0979394	0.0246078
3.32	-0.0608934	0.0602496	-0.0145289	-0.0583637	0.0475712	-0.0301424	-0.0741876	0.0973241	0.0220562
3.33	-0.0614956	0.0601371	-0.0157311	-0.0588431	0.0483088	-0.0298476	-0.0751573	0.0965886	0.0193301
3.34	-0.0620958	0.0598527	-0.0171945	-0.0593306	0.0492045	-0.0293223	-0.0761192	0.0957603	0.0164734
3.35	-0.0626924	0.0594269	-0.0188699	-0.0598278	0.0502433	-0.0285916	-0.0770725	0.0948712	0.0135365
3.36	-0.0632842	0.0589054	-0.0206854	-0.0603361	0.0514133	-0.0276762	-0.0780168	0.0939568	0.0105744
3.37	-0.0638706	0.0583472	-0.0225488	-0.0608567	0.0527059	-0.0265909	-0.0789519	0.0930545	0.00764509
3.38	-0.0644514	0.0578232	-0.0243512	-0.0613908	0.0541162	-0.0253456	-0.0798782	0.092203	0.00480737
3.39	-0.0650276	0.0574133	-0.0259707	-0.0619396	0.0556423	-0.0239446	-0.0807964	0.0914402	0.00211864
3.4	-0.0656006	0.0572036	-0.0272774	-0.0625042	0.0572858	-0.0223874	-0.0817076	0.0908024	-0.000367064
3.41	-0.0661728	0.0572829	-0.0281383	-0.0630859	0.0590506	-0.0206697	-0.0826132	0.0903226	-0.00260098
3.42	-0.0667477	0.0577395	-0.0284228	-0.0636859	0.060943	-0.0187839	-0.0835149	0.0900297	-0.00454141
3.43	-0.0673294	0.0586574	-0.0280081	-0.0643054	0.0629704	-0.0167205	-0.0844147	0.0899472	-0.00615514
3.44	-0.0679228	0.060113	-0.0267843	-0.064946	0.0651407	-0.0144696	-0.0853148	0.0900927	-0.00741866
3.45	-0.0685338	0.0621719	-0.0246594	-0.0656089	0.0674613	-0.0120221	-0.0862176	0.0904769	-0.00831892
3.46	-0.0691686	0.0648856	-0.0215637	-0.0662959	0.0699383	-0.00937073	-0.0871254	0.0911037	-0.0088538
3.47	-0.069834	0.0682894	-0.0174532	-0.0670084	0.0725756	-0.00651209	-0.0880406	0.0919697	-0.00903212
3.48	-0.070537	0.0724002	-0.012313	-0.0677481	0.0753741	-0.00344725	-0.0889657	0.0930647	-0.0088733
3.49	-0.0712846	0.0772149	-0.00615852	-0.0685166	0.078331	-0.000183006	-0.0899028	0.0943718	-0.00840662
3.5	-0.0720838	0.08271	0.000963387	-0.0693155	0.0814393	0.00326738	-0.090854	0.0958683	-0.0076702
3.51	-0.0729411	0.0888412	0.00897452	-0.0701461	0.0846871	0.00688364	-0.0918209	0.0975263	-0.00670959
3.52	-0.0738627	0.0955444	0.0177667	-0.0710098	0.088058	0.0106383	-0.0928051	0.0993139	-0.00557626
3.53	-0.0748538	0.102736	0.0272041	-0.0719078	0.0915306	0.0144966	-0.0938077	0.101196	-0.0043258
3.54	-0.0759189	0.110318	0.0371263	-0.0728409	0.0950787	0.0184172	-0.0948294	0.103136	-0.00301605
3.55	-0.0770613	0.118174	0.0473525	-0.0738097	0.0986722	0.0223526	-0.0958707	0.105096	-0.00170529
3.56	-0.0782831	0.126179	0.0576861	-0.0748146	0.102277	0.0262501	-0.0969315	0.107039	-0.000450325
3.57	-0.0795851	0.1342	0.0679202	-0.0758554	0.105857	0.0300532	-0.0980115	0.10893	0.000695189
3.58	-0.0809669	0.142098	0.0778432	-0.0769317	0.109372	0.0337029	-0.09911	0.110737	0.00168231
3.59	-0.0824264	0.149735	0.0872445	-0.0780426	0.112783	0.0371391	-0.100226	0.11243	0.00246811
3.6	-0.0839604	0.156976	0.0959207	-0.0791871	0.116051	0.0403029	-0.101358	0.113986	0.00301674
3.61	-0.0855644	0.16369	0.103681	-0.0803632	0.119136	0.0431374	-0.102505	0.115384	0.00330014
3.62	-0.0872323	0.169761	0.110352	-0.0815692	0.122003	0.0455902	-0.103666	0.11661	0.00329843
3.63	-0.0889573	0.175083	0.115783	-0.0828027	0.124619	0.0476146	-0.104837	0.117654	0.00300002
3.64	-0.0907314	0.179568	0.119851	-0.0840609	0.126955	0.049171	-0.106018	0.118512	0.00240131
3.65	-0.0925458	0.183145	0.12246	-0.085341	0.128989	0.0502284	-0.107207	0.119186	0.00150614
3.66	-0.0943913	0.185766	0.12355	-0.0866398	0.130704	0.0507652	-0.108402	0.119679	0.000324977
3.67	-0.096258	0.187401	0.123092	-0.0879541	0.132088	0.05077	-0.1096	0.120002	-0.00112617
3.68	-0.0981362	0.188044	0.121089	-0.0892806	0.133138	0.0502419	-0.110801	0.120164	-0.00282696
3.69	-0.100016	0.187709	0.11758	-0.090616	0.133857	0.0491908	-0.112003	0.12018	-0.00475412
3.7	-0.101887	0.186433	0.112634	-0.0919569	0.134254	0.047637	-0.113205	0.120064	-0.00688278
3.71	-0.103742	0.184269	0.10635	-0.0933002	0.134347	0.0456104	-0.114404	0.119832	-0.00918795
3.72	-0.10557	0.181289	0.0988498	-0.0946431	0.134157	0.04315	-0.115601	0.119498	-0.0116458
3.73	-0.107365	0.177581	0.0902799	-0.0959827	0.133713	0.0403027	-0.116794	0.119075	-0.0142347
3.74	-0.10912	0.173241	0.0808023	-0.0973168	0.133046	0.0371215	-0.117983	0.118574	-0.0169367
3.75	-0.110829	0.16838	0.0705918	-0.0986432	0.132192	0.0336643	-0.119166	0.118003	-0.0197377
3.76	-0.112486	0.163109	0.0598304	-0.0999603	0.131189	0.0299921	-0.120343	0.117368	-0.0226284
3.77	-0.11409	0.157547	0.0487026	-0.101267	0.130076	0.0261674	-0.121513	0.11667	-0.0256043
3.78	-0.115637	0.151807	0.0373901	-0.102562	0.128892	0.0222518	-0.122676	0.11591	-0.0286661
3.79	-0.117126	0.146003	0.0260675	-0.103845	0.127677	0.0183053	-0.123831	0.115082	-0.0318186
3.8	-0.118557	0.140241	0.0148979	-0.105116	0.126465	0.0143835	-0.124978	0.114182	-0.0350707
3.81	-0.119932	0.134617	0.00402927	-0.106374	0.12529	0.010537	-0.126115	0.113199	-0.0384346
3.82	-0.121251	0.129218	-0.0064086	-0.107622	0.124182	0.00681004	-0.127241	0.112124	-0.0419242
3.83	-0.122517	0.124118	-0.0163064	-0.108859	0.123164	0.00323898	-0.128357	0.110947	-0.0455544
3.84	-0.123734	0.119376	-0.0255769	-0.110086	0.122256	-0.000147828	-0.12946	0.109656	-0.0493397
3.85	-0.124906	0.115038	-0.0341558	-0.111304	0.121473	-0.00333076	-0.13055	0.108243	-0.0532925
3.86	-0.126037	0.111136	-0.0420016	-0.112516	0.120821	-0.00629897	-0.131625	0.1067	-0.0574222
3.87	-0.127131	0.107685	-0.0490954	-0.113721	0.120305	-0.00905018	-0.132684	0.105023	-0.0617338
3.88	-0.128192	0.10469	-0.0554388	-0.114922	0.119922	-0.0115902	-0.133725	0.103211	-0.0662268
3.89	-0.129226	0.102142	-0.0610526	-0.11612	0.119664	-0.0139324	-0.134748	0.101267	-0.0708939
3.9	-0.130237	0.10002	-0.0659744	-0.117316	0.11952	-0.0160963	-0.13575	0.0991982	-0.0757209
3.91	-0.131228	0.0982954	-0.0702553	-0.118511	0.119475	-0.0181068	-0.136731	0.0970189	-0.080686
3.92	-0.132204	0.0969318	-0.0739572	-0.119706	0.119511	-0.0199928	-0.13769	0.0947467	-0.0857596
3.93	-0.133168	0.0958873	-0.0771497	-0.120902	0.119608	-0.0217857	-0.138626	0.0924051	-0.0909045
3.94	-0.134123	0.0951169	-0.0799066	-0.122099	0.119745	-0.0235181	-0.139539	0.0900221	-0.0960766
3.95	-0.135071	0.0945743	-0.082303	-0.123297	0.119903	-0.0252224	-0.140427	0.0876303	-0.101226
3.96	-0.136015	0.0942139	-0.0844122	-0.124497	0.12006	-0.0269293	-0.141291	0.0852657	-0.106296
3.97	-0.136956	0.0939923	-0.0863034	-0.125698	0.120198	-0.0286669	-0.142133	0.0829674	-0.111229
3.98	-0.137896	0.0938701	-0.0880391	-0.126901	0.120302	-0.0304593	-0.142951	0.080776	-0.115962
3.99	-0.138834	0.0938129	-0.0896735	-0.128105	0.120359	-0.0323262	-0.143749	0.0787331	-0.120435
4	-0.139772	0.0937922	-0.0912512	-0.129308	0.120358	-0.0342817	-0.144527	0.0768798	-0.124585
4.01	-0.14071	0.093786	-0.0928063	-0.130512	0.120294	-0.0363345	-0.145287	0.0752556	-0.128357
4.02	-0.141648	0.0937793	-0.094362	-0.131714	0.120164	-0.0384873	-0.146033	0.0738971	-0.131696
4.03	-0.142586	0.0937639	-0.0959311	-0.132915	0.119969	-0.0407375	-0.146767	0.0728369	-0.134558
4.04	-0.143523	0.0937379	-0.0975162	-0.134113	0.119714	-0.0430768	-0.147491	0.0721029	-0.136905
4.05	-0.144461	0.0937055	-0.0991106	-0.135309	0.119406	-0.0454924	-0.14821	0.0717166	-0.138708
4.06	-0.145398	0.0936759	-0.1007	-0.136502	0.119056	-0.0479675	-0.148927	0.0716933	-0.139949
4.07	-0.146335	0.0936625	-0.102265	-0.13769	0.118677	-0.0504824	-0.149645	0.0720407	-0.140622
4.08	-0.147271	0.0936817	-0.103779	-0.138875	0.118282	-0.0530154	-0.150369	0.0727592	-0.140733
4.09	-0.148209	0.0937518	-0.105215	-0.140056	0.117886	-0.0555437	-0.151102	0.0738412	-0.140298
4.1	-0.149147	0.0938918	-0.106546	-0.141233	0.117504	-0.058045	-0.151847	0.0752716	-0.139347
4.11	-0.150087	0.0941203	-0.107743	-0.142407	0.117149	-0.0604982	-0.152609	0.0770281	-0.137919
4.12	-0.15103	0.0944542	-0.108783	-0.143577	0.116835	-0.0628844	-0.153389	0.0790813	-0.136063
4.13	-0.151977	0.0949081	-0.109644	-0.144744	0.116571	-0.0651883	-0.154191	0.081396	-0.133839
4.14	-0.152929	0.0954932	-0.110311	-0.145908	0.116366	-0.0673983	-0.155018	0.0839318	-0.131312
4.15	-0.153887	0.0962167	-0.110775	-0.147071	0.116225	-0.0695074	-0.155871	0.086644	-0.128554
4.16	-0.154854	0.0970816	-0.111034	-0.148233	0.11615	-0.0715135	-0.156751	0.0894851	-0.12564
4.17	-0.155829	0.0980863	-0.111092	-0.149395	0.116139	-0.0734198	-0.157661	0.0924057	-0.122649
4.18	-0.156816	0.0992246	-0.110961	-0.150557	0.116188	-0.0752341	-0.1586	0.0953559	-0.119657
4.19	-0.157814	0.100486	-0.11066	-0.151719	0.116289	-0.0769691	-0.159568	0.0982866	-0.116741
4.2	-0.158826	0.101855	-0.110212	-0.152883	0.116432	-0.0786419	-0.160565	0.10115	-0.113972
4.21	-0.159852	0.103313	-0.109649	-0.154048	0.116604	-0.0802726	-0.161591	0.103903	-0.111418
4.22	-0.160893	0.10484	-0.109004	-0.155215	0.11679	-0.0818843	-0.162643	0.106503	-0.109138
4.23	-0.161949	0.106412	-0.108314	-0.156384	0.116974	-0.0835018	-0.163721	0.108917	-0.107185
4.24	-0.163021	0.108002	-0.107619	-0.157555	0.11714	-0.0851504	-0.164821	0.111112	-0.105603
4.25	-0.164109	0.109586	-0.106959	-0.158727	0.117271	-0.0868549	-0.165942	0.113065	-0.104426
4.26	-0.165213	0.111137	-0.106373	-0.1599	0.117351	-0.0886388	-0.167082	0.114758	-0.103678
4.27	-0.166332	0.11263	-0.105901	-0.161074	0.117367	-0.0905229	-0.168237	0.116178	-0.103372
4.28	-0.167466	0.114041	-0.105577	-0.162247	0.117306	-0.0925244	-0.169404	0.11732	-0.103515
4.29	-0.168613	0.115348	-0.105433	-0.16342	0.11716	-0.0946565	-0.170582	0.118184	-0.104101
4.3	-0.169772	0.116532	-0.105498	-0.16459	0.116921	-0.0969269	-0.171767	0.118775	-0.105117
4.31	-0.170943	0.117576	-0.105796	-0.165758	0.116588	-0.0993385	-0.172957	0.119104	-0.106544
4.32	-0.172124	0.118467	-0.106344	-0.166922	0.116161	-0.101888	-0.174149	0.119186	-0.108354
4.33	-0.173312	0.119194	-0.107157	-0.168081	0.115646	-0.104567	-0.17534	0.119039	-0.110515
4.34	-0.174507	0.11975	-0.108242	-0.169235	0.11505	-0.107361	-0.176529	0.118685	-0.112991
4.35	-0.175707	0.12013	-0.109605	-0.170382	0.114386	-0.110251	-0.177714	0.118148	-0.115743
4.36	-0.176909	0.120335	-0.111243	-0.171523	0.113668	-0.113212	-0.178892	0.117451	-0.11873
4.37	-0.178113	0.120364	-0.113152	-0.172656	0.112913	-0.116219	-0.180062	0.11662	-0.121911
4.38	-0.179316	0.120222	-0.115324	-0.173781	0.112142	-0.11924	-0.181224	0.11568	-0.125247
4.39	-0.180517	0.119915	-0.117747	-0.174899	0.111373	-0.122244	-0.182376	0.114657	-0.128696
4.4	-0.181714	0.11945	-0.120406	-0.176009	0.110629	-0.125199	-0.183517	0.113572	-0.132223
4.41	-0.182906	0.118836	-0.123287	-0.177112	0.10993	-0.128074	-0.184647	0.112448	-0.135794
4.42	-0.184091	0.118083	-0.12637	-0.178208	0.109295	-0.13084	-0.185766	0.111305	-0.139376
4.43	-0.185267	0.117203	-0.129637	-0.179298	0.108742	-0.13347	-0.186874	0.110162	-0.142941
4.44	-0.186435	0.116208	-0.133067	-0.180383	0.108286	-0.135944	-0.18797	0.109034	-0.146465
4.45	-0.187591	0.115109	-0.136639	-0.181464	0.107939	-0.138244	-0.189055	0.107936	-0.149925
4.46	-0.188737	0.113922	-0.140331	-0.182543	0.107709	-0.140359	-0.190129	0.106882	-0.153303
4.47	-0.18987	0.112659	-0.14412	-0.183619	0.1076	-0.142286	-0.191193	0.105881	-0.156582
4.48	-0.19099	0.111335	-0.147982	-0.184695	0.107611	-0.144026	-0.192247	0.104944	-0.159747
4.49	-0.192096	0.109965	-0.151894	-0.185772	0.107738	-0.14559	-0.193292	0.104081	-0.162787
4.5	-0.193189	0.108566	-0.15583	-0.18685	0.107972	-0.146993	-0.194329	0.103298	-0.165689
4.51	-0.194268	0.107154	-0.159764	-0.187932	0.108298	-0.148258	-0.195358	0.102603	-0.168445
4.52	-0.195333	0.105748	-0.163669	-0.189017	0.108699	-0.149412	-0.196381	0.102003	-0.171044
4.53	-0.196383	0.104365	-0.167516	-0.190106	0.109154	-0.15049	-0.197399	0.101505	-0.173478
4.54	-0.19742	0.103024	-0.171276	-0.1912	0.10964	-0.151528	-0.198412	0.101114	-0.17574
4.55	-0.198444	0.101746	-0.17492	-0.192299	0.110131	-0.152566	-0.199422	0.100837	-0.177823
4.56	-0.199456	0.10055	-0.178418	-0.193403	0.1106	-0.153645	-0.200429	0.100679	-0.179719
4.57	-0.200456	0.0994571	-0.181741	-0.194511	0.11102	-0.154807	-0.201436	0.100643	-0.181425
4.58	-0.201445	0.0984859	-0.184861	-0.195623	0.111363	-0.156092	-0.202443	0.100733	-0.182938
4.59	-0.202426	0.0976553	-0.18775	-0.196738	0.111605	-0.157539	-0.203451	0.100952	-0.184255
4.6	-0.203399	0.0969828	-0.190384	-0.197855	0.111721	-0.159181	-0.204463	0.1013	-0.185379
4.61	-0.204366	0.0964835	-0.192743	-0.198972	0.111692	-0.161047	-0.205478	0.101774	-0.186314
4.62	-0.20533	0.0961702	-0.194809	-0.200089	0.111501	-0.163161	-0.206499	0.10237	-0.187069
4.63	-0.206291	0.096052	-0.196572	-0.201202	0.111135	-0.165539	-0.207526	0.103083	-0.187656
4.64	-0.207252	0.0961344	-0.198026	-0.202311	0.110588	-0.16819	-0.208561	0.1039	-0.188094
4.65	-0.208214	0.0964187	-0.199173	-0.203413	0.109855	-0.171115	-0.209604	0.104809	-0.188403
4.66	-0.209181	0.0969009	-0.20002	-0.204508	0.108941	-0.174307	-0.210657	0.105793	-0.188612
4.67	-0.210153	0.0975722	-0.200586	-0.205592	0.107853	-0.177752	-0.211721	0.106832	-0.188752
4.68	-0.211133	0.0984184	-0.200894	-0.206664	0.106603	-0.181427	-0.212794	0.107902	-0.188859
4.69	-0.212122	0.0994197	-0.200978	-0.207724	0.10521	-0.185303	-0.213879	0.108978	-0.188975
4.7	-0.213122	0.100551	-0.200878	-0.208768	0.103695	-0.189344	-0.214974	0.110031	-0.189143
4.71	-0.214134	0.101783	-0.200642	-0.209797	0.102084	-0.193508	-0.21608	0.11103	-0.189409
4.72	-0.215158	0.103082	-0.200323	-0.21081	0.100404	-0.197752	-0.217195	0.111944	-0.189822
4.73	-0.216196	0.104409	-0.19998	-0.211806	0.0986877	-0.202028	-0.218318	0.11274	-0.190428
4.74	-0.217246	0.105724	-0.199676	-0.212784	0.0969656	-0.206285	-0.219449	0.113388	-0.191274
4.75	-0.21831	0.106985	-0.199475	-0.213745	0.0952703	-0.210474	-0.220586	0.113857	-0.192403
4.76	-0.219386	0.108149	-0.199441	-0.21469	0.0936336	-0.214548	-0.221726	0.11412	-0.193855
4.77	-0.220473	0.109175	-0.199638	-0.215618	0.0920857	-0.21846	-0.222867	0.114154	-0.195662
4.78	-0.221569	0.110022	-0.200124	-0.216532	0.0906549	-0.22217	-0.224008	0.113939	-0.19785
4.79	-0.222673	0.110654	-0.200951	-0.217432	0.089366	-0.22564	-0.225145	0.113461	-0.200438
4.8	-0.223782	0.11104	-0.202166	-0.21832	0.0882404	-0.228841	-0.226277	0.112712	-0.203434
4.81	-0.224893	0.111153	-0.203805	-0.219198	0.0872951	-0.231748	-0.227399	0.11169	-0.206834
4.82	-0.226004	0.110975	-0.205891	-0.220067	0.0865423	-0.234345	-0.22851	0.110403	-0.210626
4.83	-0.227111	0.110493	-0.208438	-0.220929	0.0859892	-0.236626	-0.229606	0.108862	-0.214786
4.84	-0.228213	0.109707	-0.211446	-0.221788	0.0856378	-0.238589	-0.230686	0.107088	-0.219279
4.85	-0.229305	0.10862	-0.2149	-0.222643	0.0854848	-0.240243	-0.231748	0.105108	-0.22406
4.86	-0.230384	0.107249	-0.218772	-0.223498	0.085522	-0.241604	-0.232788	0.102957	-0.229074
4.87	-0.231449	0.105617	-0.223023	-0.224354	0.0857361	-0.242695	-0.233807	0.100672	-0.234258
4.88	-0.232496	0.103757	-0.227599	-0.225214	0.0861097	-0.243544	-0.234802	0.0982989	-0.239543
4.89	-0.233524	0.101707	-0.232437	-0.226077	0.0866215	-0.244188	-0.235773	0.0958853	-0.244852
4.9	-0.23453	0.0995131	-0.237462	-0.226947	0.087247	-0.244666	-0.236719	0.0934812	-0.25011
4.91	-0.235514	0.0972272	-0.242595	-0.227823	0.0879592	-0.245021	-0.237643	0.0911379	-0.255238
4.92	-0.236475	0.0949037	-0.24775	-0.228706	0.0887295	-0.245297	-0.238543	0.0889058	-0.260159
4.93	-0.237412	0.0925992	-0.252841	-0.229597	0.0895283	-0.245542	-0.239421	0.0868333	-0.264802
4.94	-0.238327	0.0903708	-0.257779	-0.230497	0.0903261	-0.245801	-0.24028	0.084965	-0.269101
4.95	-0.23922	0.0882737	-0.262482	-0.231404	0.0910941	-0.246118	-0.241122	0.0833404	-0.272997
4.96	-0.240093	0.0863598	-0.266872	-0.232319	0.0918051	-0.246534	-0.241948	0.0819925	-0.276445
4.97	-0.240949	0.0846757	-0.270881	-0.23324	0.0924342	-0.247086	-0.242763	0.0809464	-0.27941
4.98	-0.241788	0.0832612	-0.274452	-0.234167	0.0929594	-0.247807	-0.243568	0.080219	-0.281871
4.99	-0.242615	0.0821477	-0.277539	-0.235099	0.0933622	-0.248723	-0.244368	0.0798172	-0.283822
5	-0.243432	0.0813575	-0.280115	-0.236034	0.093628	-0.249856	-0.245166	0.0797387	-0.285273
5.01	-0.244243	0.0809024	-0.282268	-0.236971	0.0937466	-0.25132	-0.245964	0.0799707	-0.286349
5.02	-0.245052	0.0807833	-0.2839	-0.237909	0.0937119	-0.253021	-0.246767	0.0804908	-0.286989
5.03	-0.24586	0.0809902	-0.285031	-0.238845	0.0935228	-0.254958	-0.247575	0.0812673	-0.287243
5.04	-0.246673	0.0815021	-0.285698	-0.239779	0.0931822	-0.257123	-0.248393	0.0822599	-0.287179
5.05	-0.247492	0.0822878	-0.285955	-0.240709	0.0926975	-0.259504	-0.249221	0.0834208	-0.286873
5.06	-0.248319	0.0833064	-0.285866	-0.241633	0.0920799	-0.262081	-0.250062	0.084696	-0.286409
5.07	-0.249158	0.084509	-0.285512	-0.24255	0.0913441	-0.26483	-0.250916	0.086027	-0.28588
5.08	-0.25001	0.0858399	-0.28498	-0.243459	0.0905078	-0.26772	-0.251783	0.0873523	-0.28538
5.09	-0.250876	0.0872384	-0.284365	-0.24436	0.0895912	-0.270721	-0.252663	0.0886091	-0.285005
5.1	-0.251755	0.0886406	-0.283766	-0.245251	0.0886162	-0.273798	-0.253555	0.0897358	-0.284849
5.11	-0.252648	0.0899817	-0.283282	-0.246133	0.0876055	-0.276913	-0.254457	0.0906729	-0.285001
5.12	-0.253555	0.0911978	-0.28301	-0.247004	0.0865824	-0.280032	-0.255367	0.0913658	-0.285541
5.13	-0.254472	0.0922282	-0.283042	-0.247864	0.0855698	-0.28312	-0.256283	0.0917658	-0.28654
5.14	-0.255399	0.0930169	-0.283459	-0.248715	0.0845894	-0.286142	-0.257202	0.0918318	-0.288056
5.15	-0.256332	0.0935151	-0.284333	-0.249557	0.0836613	-0.28907	-0.258119	0.0915318	-0.290134
5.16	-0.257268	0.093682	-0.285722	-0.250389	0.0828032	-0.291875	-0.259031	0.0908436	-0.292802
5.17	-0.258204	0.0934866	-0.287668	-0.251213	0.0820301	-0.294538	-0.259935	0.0897555	-0.296071
5.18	-0.259137	0.0929085	-0.290197	-0.25203	0.0813539	-0.29704	-0.260825	0.0882669	-0.299936
5.19	-0.260061	0.0919383	-0.293317	-0.252841	0.0807829	-0.299371	-0.261699	0.0863881	-0.304376
5.2	-0.260974	0.0905779	-0.29702	-0.253646	0.0803216	-0.301525	-0.262552	0.0841402	-0.309352
5.21	-0.261872	0.0888407	-0.301279	-0.254448	0.0799711	-0.303502	-0.263381	0.081554	-0.314811
5.22	-0.26275	0.0867504	-0.306051	-0.255246	0.0797286	-0.305309	-0.264182	0.0786695	-0.320686
5.23	-0.263606	0.0843406	-0.31128	-0.256043	0.0795878	-0.306956	-0.264954	0.0755344	-0.326901
5.24	-0.264436	0.0816535	-0.316896	-0.256838	0.0795394	-0.30846	-0.265693	0.0722027	-0.333369
5.25	-0.265238	0.0787382	-0.322821	-0.257634	0.0795712	-0.30984	-0.266397	0.0687329	-0.339997
5.26	-0.266011	0.0756494	-0.328966	-0.25843	0.0796686	-0.311121	-0.267067	0.0651862	-0.346689
5.27	-0.266751	0.0724451	-0.33524	-0.259228	0.0798155	-0.312327	-0.267701	0.0616249	-0.353348
5.28	-0.267459	0.0691852	-0.34155	-0.260027	0.0799946	-0.313486	-0.2683	0.05811	-0.359882
5.29	-0.268135	0.0659292	-0.347804	-0.260828	0.0801882	-0.314625	-0.268864	0.0547	-0.366201
5.3	-0.268778	0.0627346	-0.353914	-0.261631	0.0803789	-0.315772	-0.269395	0.0514485	-0.372225
5.31	-0.26939	0.0596551	-0.359798	-0.262436	0.0805505	-0.316952	-0.269894	0.0484035	-0.377883
5.32	-0.269972	0.0567392	-0.365384	-0.263242	0.0806881	-0.318185	-0.270364	0.0456054	-0.383116
5.33	-0.270526	0.0540288	-0.370611	-0.264049	0.0807795	-0.319492	-0.270807	0.0430862	-0.387878
5.34	-0.271054	0.0515583	-0.375429	-0.264858	0.0808151	-0.320886	-0.271227	0.0408691	-0.39214
5.35	-0.271558	0.049354	-0.379801	-0.265666	0.0807886	-0.322375	-0.271626	0.0389678	-0.395884
5.36	-0.272042	0.047434	-0.383705	-0.266473	0.0806976	-0.323963	-0.272007	0.0373865	-0.399109
5.37	-0.272508	0.045808	-0.387128	-0.26728	0.0805433	-0.325646	-0.272375	0.0361203	-0.401827
5.38	-0.272959	0.0444776	-0.390075	-0.268084	0.0803311	-0.327415	-0.272731	0.0351558	-0.404064
5.39	-0.273399	0.0434375	-0.392556	-0.268886	0.0800704	-0.329255	-0.273079	0.034472	-0.405857
5.4	-0.273829	0.0426759	-0.394595	-0.269686	0.0797743	-0.331146	-0.273421	0.0340414	-0.407251
5.41	-0.274253	0.0421761	-0.396222	-0.270482	0.0794591	-0.333061	-0.273761	0.0338315	-0.408301
5.42	-0.274674	0.0419178	-0.397471	-0.271275	0.0791443	-0.33497	-0.274099	0.0338061	-0.409066
5.43	-0.275093	0.0418782	-0.398381	-0.272065	0.0788517	-0.336841	-0.274438	0.0339275	-0.409605
5.44	-0.275512	0.042034	-0.398992	-0.272852	0.0786046	-0.338638	-0.274778	0.0341573	-0.409981
5.45	-0.275934	0.0423625	-0.399341	-0.273638	0.078427	-0.340324	-0.275121	0.0344587	-0.41025
5.46	-0.27636	0.042843	-0.399462	-0.274421	0.0783429	-0.341865	-0.275467	0.034798	-0.410466
5.47	-0.276792	0.0434577	-0.399386	-0.275205	0.0783749	-0.343226	-0.275817	0.0351455	-0.410675
5.48	-0.27723	0.0441932	-0.399133	-0.27599	0.0785439	-0.344378	-0.276171	0.035477	-0.410913
5.49	-0.277676	0.0450404	-0.398722	-0.276777	0.0788673	-0.345296	-0.276527	0.0357748	-0.411208
5.5	-0.278131	0.0459952	-0.398158	-0.277568	0.0793587	-0.345963	-0.276886	0.0360279	-0.411577
5.51	-0.278597	0.0470585	-0.397443	-0.278365	0.0800268	-0.346366	-0.277248	0.0362326	-0.412023
5.52	-0.279073	0.0482353	-0.396571	-0.279169	0.0808747	-0.346504	-0.277611	0.0363925	-0.412541
5.53	-0.279562	0.0495347	-0.395529	-0.279983	0.081899	-0.346385	-0.277975	0.0365177	-0.413114
5.54	-0.280064	0.0509683	-0.394302	-0.280808	0.0830899	-0.346028	-0.278341	0.0366245	-0.413718
5.55	-0.280582	0.052549	-0.392871	-0.281645	0.0844304	-0.345459	-0.278708	0.0367341	-0.414319
5.56	-0.281116	0.0542898	-0.39122	-0.282497	0.0858964	-0.344719	-0.279076	0.0368717	-0.414879
5.57	-0.281669	0.0562016	-0.389334	-0.283364	0.0874569	-0.343857	-0.279446	0.0370646	-0.415356
5.58	-0.282241	0.058292	-0.387203	-0.284247	0.0890743	-0.342932	-0.279818	0.0373407	-0.415709
5.59	-0.282835	0.0605632	-0.384829	-0.285146	0.0907051	-0.342011	-0.280193	0.0377271	-0.415897
5.6	-0.283453	0.0630104	-0.382219	-0.286061	0.0923004	-0.34117	-0.280573	0.0382478	-0.415885
5.61	-0.284096	0.0656208	-0.379398	-0.286991	0.0938072	-0.340489	-0.280959	0.0389227	-0.415646
5.62	-0.284766	0.0683716	-0.376402	-0.287937	0.0951696	-0.340052	-0.281352	0.0397653	-0.41516
5.63	-0.285464	0.07123	-0.373283	-0.288894	0.0963297	-0.339946	-0.281755	0.040782	-0.41442
5.64	-0.286191	0.0741521	-0.370111	-0.289863	0.0972298	-0.340255	-0.282169	0.0419706	-0.413433
5.65	-0.286947	0.0770832	-0.366971	-0.290838	0.0978134	-0.341064	-0.282595	0.0433196	-0.412219
5.66	-0.287733	0.0799582	-0.363961	-0.291818	0.098027	-0.342447	-0.283036	0.0448079	-0.410812
5.67	-0.288546	0.0827025	-0.361196	-0.292797	0.0978216	-0.344476	-0.283492	0.0464045	-0.409263
5.68	-0.289386	0.0852337	-0.358799	-0.293773	0.0971545	-0.347208	-0.283964	0.048069	-0.407634
5.69	-0.29025	0.0874628	-0.356904	-0.294739	0.0959907	-0.35069	-0.284454	0.0497522	-0.406002
5.7	-0.291134	0.0892976	-0.355646	-0.295691	0.0943038	-0.354955	-0.284959	0.0513975	-0.404454
5.71	-0.292035	0.0906443	-0.355165	-0.296624	0.092078	-0.360019	-0.285481	0.0529422	-0.403086
5.72	-0.292946	0.0914112	-0.355591	-0.297531	0.0893082	-0.365881	-0.286018	0.0543192	-0.401998
5.73	-0.293861	0.0915117	-0.35705	-0.298408	0.0860011	-0.372524	-0.286567	0.0554595	-0.401294
5.74	-0.294774	0.0908672	-0.359651	-0.29925	0.0821756	-0.379909	-0.287126	0.0562943	-0.401075
5.75	-0.295676	0.0894109	-0.363484	-0.30005	0.0778626	-0.387981	-0.287692	0.0567574	-0.401438
5.76	-0.296559	0.0870902	-0.368619	-0.300806	0.0731049	-0.396668	-0.28826	0.0567875	-0.402471
5.77	-0.297415	0.08387	-0.375094	-0.301511	0.0679567	-0.405879	-0.288826	0.0563313	-0.404249
5.78	-0.298234	0.079735	-0.382921	-0.302164	0.0624826	-0.415509	-0.289385	0.0553453	-0.406831
5.79	-0.299007	0.0746916	-0.392074	-0.30276	0.0567563	-0.425442	-0.289932	0.0537978	-0.410257
5.8	-0.299725	0.0687692	-0.402496	-0.303298	0.0508592	-0.435548	-0.290459	0.0516715	-0.414546
5.81	-0.300379	0.0620211	-0.41409	-0.303777	0.0448787	-0.44569	-0.290963	0.0489641	-0.419691
5.82	-0.300963	0.0545245	-0.426726	-0.304196	0.0389063	-0.455728	-0.291437	0.0456898	-0.425663
5.83	-0.301468	0.0463798	-0.440238	-0.304556	0.0330353	-0.465519	-0.291875	0.0418798	-0.432404
5.84	-0.301889	0.0377093	-0.45443	-0.304858	0.0273586	-0.474922	-0.292273	0.0375824	-0.439832
5.85	-0.302221	0.0286545	-0.469077	-0.305104	0.0219668	-0.483801	-0.292626	0.0328624	-0.447841
5.86	-0.302461	0.019374	-0.483929	-0.305299	0.0169454	-0.492031	-0.29293	0.0278001	-0.456302
5.87	-0.302609	0.0100397	-0.498721	-0.305445	0.0123732	-0.499495	-0.293181	0.0224896	-0.465064
5.88	-0.302663	0.00083256	-0.513175	-0.305548	0.00832005	-0.506094	-0.293379	0.0170371	-0.473962
5.89	-0.302626	-0.00806156	-0.527007	-0.305613	0.00484497	-0.511746	-0.293522	0.0115583	-0.482816
5.9	-0.302503	-0.0164567	-0.539939	-0.305647	0.00199475	-0.516388	-0.293611	0.00617507	-0.491439
5.91	-0.3023	-0.0241716	-0.5517	-0.305656	-0.000197353	-0.519979	-0.293647	0.00101297	-0.499641
5.92	-0.302023	-0.0310351	-0.562038	-0.305646	-0.00171251	-0.5225	-0.293632	-0.00380257	-0.507233
5.93	-0.301683	-0.0368904	-0.570728	-0.305624	-0.00254685	-0.523955	-0.293572	-0.00814961	-0.514034
5.94	-0.301289	-0.0415997	-0.577573	-0.305597	-0.00271161	-0.524372	-0.293471	-0.0119132	-0.519874
5.95	-0.300855	-0.0450488	-0.582416	-0.305572	-0.00223286	-0.523802	-0.293336	-0.0149888	-0.524603
5.96	-0.300393	-0.0471499	-0.585143	-0.305555	-0.00115088	-0.522316	-0.293174	-0.0172855	-0.528092
5.97	-0.299917	-0.0478452	-0.585685	-0.305551	0.000480884	-0.520005	-0.292994	-0.0187287	-0.53024
5.98	-0.299441	-0.0471086	-0.584025	-0.305566	0.00259719	-0.516978	-0.292803	-0.0192628	-0.530973
5.99	-0.29898	-0.0449467	-0.580194	-0.305605	0.00512268	-0.513357	-0.292612	-0.0188532	-0.530254
6	-0.298547	-0.0414001	-0.574277	-0.30567	0.00797384	-0.509276	-0.292429	-0.0174876	-0.528078
6.01	-0.298156	-0.0365417	-0.566407	-0.305765	0.0110611	-0.504878	-0.292265	-0.0151769	-0.524475
6.02	-0.29782	-0.0304759	-0.556763	-0.305892	0.0142913	-0.500308	-0.292129	-0.0119553	-0.519515
6.03	-0.297551	-0.023336	-0.545569	-0.306051	0.0175699	-0.495715	-0.292029	-0.00788012	-0.513297
6.04	-0.297357	-0.0152813	-0.533084	-0.306243	0.0208032	-0.491241	-0.291974	-0.00303019	-0.505956
6.05	-0.297248	-0.00649243	-0.5196	-0.306467	0.0239014	-0.487024	-0.291971	0.00249552	-0.497655
6.06	-0.297229	0.00283237	-0.505431	-0.306721	0.0267798	-0.483191	-0.292026	0.00858036	-0.488584
6.07	-0.297305	0.0124829	-0.490906	-0.307002	0.0293616	-0.479857	-0.292144	0.0150929	-0.478951
6.08	-0.297479	0.0222421	-0.476365	-0.307307	0.0315793	-0.477119	-0.292329	0.0218903	-0.468983
6.09	-0.29775	0.0318919	-0.462141	-0.307632	0.0333762	-0.47506	-0.292583	0.0288218	-0.458915
6.1	-0.298116	0.0412186	-0.44856	-0.307973	0.0347077	-0.473742	-0.292906	0.0357327	-0.448984
6.11	-0.298573	0.0500184	-0.43593	-0.308325	0.0355417	-0.473205	-0.293297	0.0424686	-0.439429
6.12	-0.299114	0.0581026	-0.424531	-0.308682	0.0358594	-0.473471	-0.293754	0.0488791	-0.430475
6.13	-0.299732	0.0653025	-0.41461	-0.309041	0.0356551	-0.474542	-0.294273	0.0548223	-0.422335
6.14	-0.300417	0.0714732	-0.406375	-0.309394	0.0349356	-0.476398	-0.294849	0.060168	-0.415202
6.15	-0.301158	0.0764972	-0.399991	-0.309738	0.0337199	-0.479002	-0.295475	0.0648013	-0.409241
6.16	-0.301943	0.0802869	-0.395574	-0.310067	0.0320376	-0.482302	-0.296143	0.0686257	-0.40459
6.17	-0.30276	0.0827864	-0.39319	-0.310377	0.0299279	-0.48623	-0.296844	0.0715657	-0.401352
6.18	-0.303595	0.0839723	-0.392855	-0.310665	0.0274379	-0.490708	-0.297571	0.0735682	-0.399594
6.19	-0.304435	0.0838536	-0.394535	-0.310925	0.0246207	-0.495648	-0.298313	0.0746042	-0.399346
6.2	-0.305268	0.0824704	-0.39815	-0.311156	0.0215335	-0.500958	-0.29906	0.0746691	-0.400601
6.21	-0.306081	0.0798924	-0.403572	-0.311355	0.0182359	-0.506543	-0.299803	0.0737829	-0.403313
6.22	-0.306862	0.0762158	-0.410635	-0.311521	0.0147874	-0.512307	-0.300533	0.0719889	-0.407401
6.23	-0.307602	0.0715602	-0.419141	-0.311651	0.0112464	-0.518161	-0.30124	0.0693526	-0.41275
6.24	-0.308291	0.0660643	-0.428861	-0.311746	0.00766743	-0.524018	-0.301917	0.0659593	-0.419218
6.25	-0.308921	0.0598816	-0.439548	-0.311805	0.00410054	-0.529801	-0.302557	0.0619119	-0.426634
6.26	-0.309487	0.0531755	-0.45094	-0.311828	0.000589525	-0.535444	-0.303154	0.0573272	-0.434811
6.27	-0.309984	0.0461147	-0.462773	-0.311817	-0.00282889	-0.540891	-0.303703	0.0523331	-0.443543
6.28	-0.310409	0.0388679	-0.474781	-0.311772	-0.00612576	-0.546099	-0.3042	0.047064	-0.45262
6.29	-0.310761	0.0315992	-0.486711	-0.311695	-0.00928026	-0.551039	-0.304644	0.0416579	-0.461825
6.3	-0.311041	0.0244635	-0.498325	-0.311587	-0.0122797	-0.555693	-0.305033	0.0362515	-0.470947
6.31	-0.311251	0.0176028	-0.509408	-0.31145	-0.0151191	-0.560055	-0.30537	0.030977	-0.479783
6.32	-0.311395	0.0111423	-0.519773	-0.311286	-0.017801	-0.564133	-0.305654	0.0259581	-0.488148
6.33	-0.311476	0.00518775	-0.529264	-0.311095	-0.0203337	-0.567941	-0.30589	0.0213069	-0.495872
6.34	-0.311501	-0.000176675	-0.53776	-0.310879	-0.0227313	-0.571504	-0.306082	0.0171207	-0.502812
6.35	-0.311475	-0.00488983	-0.545177	-0.310641	-0.0250115	-0.57485	-0.306235	0.0134796	-0.508854
6.36	-0.311406	-0.00891414	-0.551466	-0.31038	-0.0271944	-0.578011	-0.306354	0.0104446	-0.513911
6.37	-0.311299	-0.0122355	-0.556618	-0.310097	-0.0293012	-0.581023	-0.306446	0.00805634	-0.517932
6.38	-0.311163	-0.0148622	-0.560655	-0.309794	-0.0313527	-0.583918	-0.306517	0.00633425	-0.520897
6.39	-0.311004	-0.0168236	-0.563633	-0.309471	-0.0333678	-0.586726	-0.306575	0.00527661	-0.522818
6.4	-0.310829	-0.0181675	-0.565636	-0.309127	-0.0353621	-0.58947	-0.306625	0.0048611	-0.52374
6.41	-0.310643	-0.0189579	-0.566771	-0.308764	-0.0373468	-0.59217	-0.306674	0.00504597	-0.523736
6.42	-0.310452	-0.0192715	-0.567164	-0.30838	-0.0393281	-0.594833	-0.306728	0.00577182	-0.522907
6.43	-0.310259	-0.0191944	-0.566954	-0.307977	-0.041306	-0.597461	-0.306791	0.00696381	-0.521376
6.44	-0.310069	-0.0188184	-0.566288	-0.307554	-0.0432747	-0.600045	-0.306869	0.00853431	-0.519284
6.45	-0.309884	-0.0182379	-0.565315	-0.307112	-0.0452215	-0.602564	-0.306963	0.0103859	-0.516786
6.46	-0.309705	-0.0175455	-0.56418	-0.30665	-0.0471283	-0.604993	-0.307077	0.0124147	-0.514045
6.47	-0.309533	-0.0168298	-0.56302	-0.30617	-0.048971	-0.607294	-0.307212	0.0145134	-0.511229
6.48	-0.309368	-0.0161716	-0.561959	-0.305671	-0.0507211	-0.609424	-0.307368	0.0165749	-0.508502
6.49	-0.309209	-0.0156416	-0.561104	-0.305156	-0.0523465	-0.611337	-0.307543	0.0184956	-0.506022
6.5	-0.309055	-0.0152987	-0.560544	-0.304625	-0.0538127	-0.612981	-0.307737	0.0201783	-0.503936
6.51	-0.308903	-0.015188	-0.56055	-0.304081	-0.0550844	-0.61451	-0.307946	0.021535	-0.502581
6.52	-0.308751	-0.0153402	-0.56096	-0.303524	-0.056127	-0.615669	-0.308166	0.0224897	-0.501862
6.53	-0.308595	-0.0157714	-0.561795	-0.302959	-0.0569081	-0.616411	-0.308394	0.02298	-0.501868
6.54	-0.308434	-0.0164828	-0.563052	-0.302387	-0.0573992	-0.616697	-0.308625	0.0229589	-0.502665
6.55	-0.308265	-0.0174622	-0.564708	-0.301812	-0.057577	-0.616497	-0.308852	0.0223958	-0.504291
6.56	-0.308085	-0.0186847	-0.566722	-0.301237	-0.0574248	-0.615788	-0.309071	0.021277	-0.50676
6.57	-0.307891	-0.0201148	-0.569034	-0.300665	-0.0569336	-0.614562	-0.309276	0.0196054	-0.510057
6.58	-0.307682	-0.0217087	-0.571575	-0.3001	-0.0561027	-0.612824	-0.309461	0.0174004	-0.514145
6.59	-0.307456	-0.0234157	-0.574265	-0.299544	-0.0549406	-0.610592	-0.309622	0.0146964	-0.518963
6.6	-0.307214	-0.0251818	-0.577019	-0.299002	-0.0534649	-0.607898	-0.309754	0.0115416	-0.524429
6.61	-0.306953	-0.0269515	-0.57975	-0.298476	-0.0517023	-0.604788	-0.309852	0.00799596	-0.530445
6.62	-0.306675	-0.0286705	-0.582377	-0.297969	-0.0496883	-0.601319	-0.309913	0.00412893	-0.536899
6.63	-0.30638	-0.030288	-0.584823	-0.297483	-0.0474656	-0.597563	-0.309934	1.72254e-05	-0.543667
6.64	-0.30607	-0.0317588	-0.587018	-0.297021	-0.0450842	-0.593597	-0.309913	-0.00425792	-0.550622
6.65	-0.305746	-0.0330451	-0.588909	-0.296582	-0.0425986	-0.589509	-0.309849	-0.00861334	-0.557634
6.66	-0.30541	-0.0341179	-0.590453	-0.296169	-0.0400673	-0.585389	-0.309741	-0.0129665	-0.564576
6.67	-0.305064	-0.0349579	-0.591624	-0.295781	-0.0375501	-0.58133	-0.30959	-0.0172382	-0.571325
6.68	-0.304712	-0.0355562	-0.592412	-0.295418	-0.0351068	-0.577423	-0.309397	-0.0213545	-0.577771
6.69	-0.304354	-0.035914	-0.592823	-0.295079	-0.0327948	-0.573754	-0.309164	-0.0252491	-0.583815
6.7	-0.303994	-0.0360428	-0.592878	-0.294762	-0.0306671	-0.570403	-0.308893	-0.028865	-0.589371
6.71	-0.303634	-0.0359631	-0.592611	-0.294465	-0.0287709	-0.56744	-0.308588	-0.0321556	-0.594374
6.72	-0.303276	-0.0357035	-0.592071	-0.294186	-0.0271452	-0.564919	-0.308251	-0.0350861	-0.598775
6.73	-0.302921	-0.035299	-0.591313	-0.293921	-0.0258202	-0.562884	-0.307887	-0.0376336	-0.602545
6.74	-0.30257	-0.0347897	-0.5904	-0.293668	-0.0248153	-0.561359	-0.3075	-0.0397874	-0.605673
6.75	-0.302225	-0.0342183	-0.589401	-0.293424	-0.0241391	-0.560353	-0.307093	-0.0415488	-0.608167
6.76	-0.301886	-0.0336286	-0.588382	-0.293185	-0.0237883	-0.559856	-0.306671	-0.0429304	-0.610053
6.77	-0.301553	-0.0330634	-0.58741	-0.292947	-0.0237483	-0.559839	-0.306236	-0.0439547	-0.61137
6.78	-0.301225	-0.0325626	-0.586545	-0.292709	-0.023993	-0.560259	-0.305793	-0.0446533	-0.612174
6.79	-0.300902	-0.0321613	-0.58584	-0.292467	-0.0244863	-0.561056	-0.305344	-0.0450651	-0.612527
6.8	-0.300582	-0.0318885	-0.585339	-0.292219	-0.0251827	-0.562156	-0.304893	-0.0452346	-0.612503
6.81	-0.300264	-0.031766	-0.585071	-0.291963	-0.0260293	-0.563475	-0.30444	-0.0452097	-0.612179
6.82	-0.299946	-0.0318074	-0.585056	-0.291698	-0.0269676	-0.564921	-0.303989	-0.0450407	-0.611635
6.83	-0.299627	-0.0320178	-0.5853	-0.291424	-0.0279351	-0.566398	-0.30354	-0.0447772	-0.61095
6.84	-0.299305	-0.0323933	-0.585793	-0.29114	-0.0288684	-0.567807	-0.303094	-0.0444677	-0.610197
6.85	-0.298979	-0.0329222	-0.586514	-0.290847	-0.029705	-0.569054	-0.302651	-0.0441568	-0.609448
6.86	-0.298647	-0.0335847	-0.587433	-0.290546	-0.0303857	-0.570049	-0.302211	-0.0438845	-0.608762
6.87	-0.298307	-0.0343548	-0.588505	-0.29024	-0.0308571	-0.570713	-0.301773	-0.043685	-0.608192
6.88	-0.297959	-0.0352011	-0.589683	-0.28993	-0.0310737	-0.57098	-0.301337	-0.0435856	-0.607778
6.89	-0.297603	-0.0360885	-0.59091	-0.28962	-0.0309995	-0.570799	-0.300901	-0.0436062	-0.60755
6.9	-0.297238	-0.0369803	-0.59213	-0.289311	-0.0306099	-0.570135	-0.300465	-0.0437593	-0.607524
6.91	-0.296864	-0.0378394	-0.593287	-0.289009	-0.0298925	-0.568976	-0.300026	-0.0440498	-0.607706
6.92	-0.296481	-0.0386306	-0.594326	-0.288715	-0.0288483	-0.567328	-0.299583	-0.0444753	-0.60809
6.93	-0.296092	-0.0393222	-0.595201	-0.288433	-0.0274916	-0.565217	-0.299136	-0.045027	-0.608661
6.94	-0.295696	-0.0398877	-0.595872	-0.288166	-0.02585	-0.562691	-0.298683	-0.0456904	-0.609394
6.95	-0.295295	-0.040307	-0.59631	-0.287917	-0.0239636	-0.559816	-0.298222	-0.0464463	-0.610259
6.96	-0.29489	-0.0405676	-0.596499	-0.287688	-0.0218839	-0.556674	-0.297754	-0.0472719	-0.611219
6.97	-0.294484	-0.0406653	-0.596435	-0.28748	-0.0196722	-0.553362	-0.297277	-0.0481421	-0.612234
6.98	-0.294078	-0.0406045	-0.596126	-0.287295	-0.0173977	-0.549988	-0.296791	-0.049031	-0.613264
6.99	-0.293673	-0.0403984	-0.595596	-0.287132	-0.015135	-0.546667	-0.296296	-0.0499128	-0.61427
7	-0.29327	-0.0400684	-0.59488	-0.286992	-0.0129615	-0.543518	-0.295793	-0.0507631	-0.615214
7.01	-0.292872	-0.039643	-0.594023	-0.286873	-0.0109552	-0.540658	-0.295281	-0.0515598	-0.616063
7.02	-0.292478	-0.0391572	-0.593079	-0.286772	-0.00919111	-0.5382	-0.294762	-0.0522844	-0.61679
7.03	-0.292089	-0.0386504	-0.592112	-0.286688	-0.00773913	-0.536247	-0.294236	-0.0529222	-0.617372
7.04	-0.291705	-0.0381652	-0.591185	-0.286616	-0.0066611	-0.534888	-0.293704	-0.053463	-0.617796
7.05	-0.291326	-0.0377449	-0.590365	-0.286553	-0.0060085	-0.534198	-0.293167	-0.0539011	-0.618054
7.06	-0.29095	-0.0374318	-0.589715	-0.286495	-0.00582032	-0.534228	-0.292627	-0.0542357	-0.618147
7.07	-0.290577	-0.037265	-0.589295	-0.286436	-0.00612135	-0.535011	-0.292083	-0.05447	-0.618082
7.08	-0.290204	-0.0372784	-0.589153	-0.286371	-0.00692098	-0.536552	-0.291538	-0.0546115	-0.617871
7.09	-0.289831	-0.037499	-0.589327	-0.286296	-0.00821244	-0.538833	-0.290991	-0.0546708	-0.617532
7.1	-0.289454	-0.037945	-0.589844	-0.286205	-0.00997266	-0.541812	-0.290445	-0.0546611	-0.617086
7.11	-0.289071	-0.0386247	-0.590711	-0.286095	-0.0121627	-0.545422	-0.289899	-0.0545971	-0.616558
7.12	-0.288681	-0.0395357	-0.591922	-0.285961	-0.0147285	-0.549574	-0.289353	-0.0544942	-0.61597
7.13	-0.28828	-0.0406641	-0.593452	-0.2858	-0.0176028	-0.554158	-0.288809	-0.0543675	-0.615348
7.14	-0.287867	-0.0419847	-0.595259	-0.285608	-0.0207069	-0.559049	-0.288266	-0.0542308	-0.614713
7.15	-0.28744	-0.0434617	-0.597284	-0.285385	-0.0239531	-0.56411	-0.287725	-0.0540958	-0.614083
7.16	-0.286997	-0.045049	-0.599456	-0.285129	-0.0272476	-0.569195	-0.287184	-0.0539714	-0.61347
7.17	-0.286539	-0.0466924	-0.601689	-0.284841	-0.0304937	-0.574155	-0.286645	-0.053863	-0.612885
7.18	-0.286064	-0.0483309	-0.603889	-0.28452	-0.0335949	-0.578844	-0.286107	-0.0537721	-0.612327
7.19	-0.285573	-0.0498992	-0.605957	-0.28417	-0.0364586	-0.583121	-0.28557	-0.0536963	-0.611794
7.2	-0.285066	-0.0513299	-0.607789	-0.283792	-0.038999	-0.586858	-0.285033	-0.0536293	-0.611276
7.21	-0.284547	-0.0525564	-0.609287	-0.283391	-0.0411405	-0.589946	-0.284498	-0.053561	-0.610757
7.22	-0.284016	-0.0535159	-0.610357	-0.282971	-0.0428207	-0.592295	-0.283963	-0.053478	-0.610216
7.23	-0.283478	-0.0541518	-0.610917	-0.282537	-0.0439928	-0.59384	-0.283428	-0.0533645	-0.60963
7.24	-0.282935	-0.0544165	-0.610899	-0.282093	-0.0446274	-0.594545	-0.282896	-0.0532029	-0.608972
7.25	-0.282391	-0.0542742	-0.610254	-0.281646	-0.0447145	-0.594401	-0.282365	-0.0529751	-0.608215
7.26	-0.281851	-0.0537024	-0.608954	-0.281201	-0.044264	-0.593433	-0.281837	-0.0526632	-0.607333
7.27	-0.281319	-0.0526945	-0.606995	-0.280763	-0.0433063	-0.591696	-0.281312	-0.0522506	-0.606301
7.28	-0.280799	-0.0512603	-0.604398	-0.280337	-0.0418912	-0.589274	-0.280792	-0.0517237	-0.605101
7.29	-0.280295	-0.049427	-0.601213	-0.279927	-0.0400879	-0.586279	-0.280278	-0.0510723	-0.603719
7.3	-0.279811	-0.0472394	-0.597514	-0.279536	-0.0379821	-0.582848	-0.279771	-0.0502907	-0.602147
7.31	-0.279351	-0.044759	-0.593401	-0.279168	-0.0356743	-0.579142	-0.279273	-0.0493787	-0.600387
7.32	-0.278917	-0.0420632	-0.588995	-0.278823	-0.0332769	-0.575333	-0.278784	-0.0483421	-0.598451
7.33	-0.278511	-0.0392429	-0.584441	-0.278502	-0.0309106	-0.57161	-0.278307	-0.047193	-0.596358
7.34	-0.278133	-0.0364007	-0.579897	-0.278205	-0.0287006	-0.568162	-0.277841	-0.0459496	-0.594139
7.35	-0.277783	-0.0336477	-0.575534	-0.277928	-0.0267729	-0.56518	-0.277388	-0.0446368	-0.591833
7.36	-0.277459	-0.0311	-0.571527	-0.277668	-0.0252501	-0.562848	-0.276949	-0.0432849	-0.589487
7.37	-0.27716	-0.0288751	-0.568054	-0.277421	-0.0242474	-0.561336	-0.276523	-0.0419293	-0.587157
7.38	-0.27688	-0.0270881	-0.565285	-0.277181	-0.0238685	-0.560794	-0.27611	-0.0406096	-0.584902
7.39	-0.276616	-0.0258475	-0.56338	-0.276941	-0.0242018	-0.561349	-0.27571	-0.0393681	-0.582787
7.4	-0.276362	-0.0252513	-0.562481	-0.276695	-0.0253175	-0.563096	-0.275322	-0.0382485	-0.580879
7.41	-0.276109	-0.0253834	-0.562706	-0.276433	-0.0272646	-0.566098	-0.274945	-0.0372946	-0.57924
7.42	-0.275851	-0.0263097	-0.564145	-0.276147	-0.0300684	-0.570382	-0.274576	-0.0365483	-0.577935
7.43	-0.27558	-0.0280755	-0.566855	-0.275828	-0.0337297	-0.575936	-0.274213	-0.0360483	-0.577018
7.44	-0.275287	-0.0307029	-0.570857	-0.275469	-0.0382232	-0.582707	-0.273854	-0.0358285	-0.576538
7.45	-0.274964	-0.034189	-0.576132	-0.275062	-0.0434981	-0.590605	-0.273496	-0.0359163	-0.576532
7.46	-0.274601	-0.0385049	-0.582624	-0.274597	-0.0494785	-0.599501	-0.273135	-0.0363316	-0.577026
7.47	-0.274191	-0.0435952	-0.590235	-0.27407	-0.056065	-0.609234	-0.272768	-0.0370854	-0.578032
7.48	-0.273727	-0.0493793	-0.59883	-0.273475	-0.0631374	-0.619608	-0.272393	-0.0381797	-0.579547
7.49	-0.273202	-0.055752	-0.608237	-0.272807	-0.070557	-0.630405	-0.272004	-0.039606	-0.581554
7.5	-0.27261	-0.0625865	-0.618252	-0.272063	-0.0781707	-0.641385	-0.2716	-0.0413462	-0.584019
7.51	-0.271949	-0.0697369	-0.628645	-0.271243	-0.0858147	-0.652294	-0.271176	-0.0433724	-0.586895
7.52	-0.271215	-0.0770423	-0.639166	-0.270347	-0.0933194	-0.662872	-0.270731	-0.0456475	-0.590122
7.53	-0.270409	-0.0843314	-0.649549	-0.269378	-0.100514	-0.672859	-0.270263	-0.0481264	-0.593624
7.54	-0.26953	-0.0914265	-0.659522	-0.268339	-0.10723	-0.682003	-0.269769	-0.0507573	-0.597322
7.55	-0.268581	-0.0981496	-0.668817	-0.267236	-0.113309	-0.690068	-0.269248	-0.0534832	-0.601124
7.56	-0.267569	-0.104327	-0.677173	-0.266076	-0.118604	-0.69684	-0.268699	-0.056244	-0.604938
7.57	-0.266497	-0.109796	-0.684349	-0.264867	-0.122986	-0.702132	-0.268123	-0.0589786	-0.608669
7.58	-0.265376	-0.114408	-0.690129	-0.263619	-0.126347	-0.705795	-0.26752	-0.061627	-0.612226
7.59	-0.264213	-0.118035	-0.694329	-0.262344	-0.128604	-0.707715	-0.266891	-0.0641324	-0.615523
7.6	-0.263019	-0.120573	-0.696808	-0.261051	-0.129701	-0.707825	-0.266238	-0.0664436	-0.618485
7.61	-0.261805	-0.121948	-0.697467	-0.259754	-0.129611	-0.706099	-0.265563	-0.0685172	-0.621047
7.62	-0.260584	-0.122115	-0.696256	-0.258463	-0.128336	-0.702563	-0.264869	-0.0703189	-0.623161
7.63	-0.259367	-0.121065	-0.693178	-0.257191	-0.12591	-0.697284	-0.264158	-0.0718257	-0.624796
7.64	-0.258167	-0.118822	-0.68829	-0.255949	-0.122397	-0.690379	-0.263434	-0.0730268	-0.625939
7.65	-0.256995	-0.115444	-0.6817	-0.254747	-0.11789	-0.682005	-0.262699	-0.0739244	-0.6266
7.66	-0.255862	-0.111024	-0.673568	-0.253594	-0.112505	-0.672359	-0.261956	-0.0745339	-0.626805
7.67	-0.254778	-0.105687	-0.664099	-0.252499	-0.106386	-0.66167	-0.261209	-0.0748841	-0.626605
7.68	-0.253751	-0.0995857	-0.653543	-0.251469	-0.0996927	-0.650197	-0.26046	-0.0750165	-0.626066
7.69	-0.252788	-0.0928988	-0.642185	-0.250507	-0.0926019	-0.638219	-0.259709	-0.0749836	-0.625271
7.7	-0.251894	-0.0858242	-0.630336	-0.249618	-0.0853007	-0.626028	-0.25896	-0.0748482	-0.624321
7.71	-0.251072	-0.0785749	-0.618329	-0.248801	-0.0779817	-0.613923	-0.258213	-0.0746807	-0.623323
7.72	-0.250323	-0.0713723	-0.606505	-0.248058	-0.0708381	-0.602198	-0.257467	-0.0745568	-0.622395
7.73	-0.249644	-0.0644402	-0.595207	-0.247384	-0.064058	-0.591141	-0.256721	-0.074555	-0.621656
7.74	-0.249033	-0.0579978	-0.584765	-0.246775	-0.0578197	-0.581017	-0.255975	-0.0747535	-0.621224
7.75	-0.248482	-0.0522535	-0.575491	-0.246225	-0.0522869	-0.57207	-0.255226	-0.0752275	-0.62121
7.76	-0.247985	-0.0473985	-0.567667	-0.245726	-0.0476036	-0.564508	-0.25447	-0.0760455	-0.621716
7.77	-0.247531	-0.0436004	-0.561535	-0.24527	-0.0438912	-0.558504	-0.253704	-0.0772671	-0.622827
7.78	-0.247109	-0.0409983	-0.557293	-0.244845	-0.0412442	-0.554189	-0.252923	-0.0789396	-0.624609
7.79	-0.246707	-0.0396981	-0.555084	-0.244441	-0.0397283	-0.551646	-0.252123	-0.0810962	-0.627107
7.8	-0.246311	-0.0397685	-0.554994	-0.244047	-0.0393783	-0.550911	-0.2513	-0.0837533	-0.630338
7.81	-0.245907	-0.0412388	-0.557045	-0.24365	-0.0401973	-0.55197	-0.250447	-0.0869092	-0.634291
7.82	-0.245481	-0.0440968	-0.561197	-0.243239	-0.0421565	-0.554763	-0.24956	-0.0905434	-0.638929
7.83	-0.245021	-0.0482892	-0.567349	-0.242804	-0.0451964	-0.559179	-0.248635	-0.0946157	-0.64418
7.84	-0.244512	-0.0537218	-0.575334	-0.242332	-0.0492278	-0.565067	-0.247667	-0.0990666	-0.649949
7.85	-0.243943	-0.060262	-0.58493	-0.241816	-0.0541348	-0.572232	-0.246653	-0.103818	-0.656109
7.86	-0.243304	-0.067742	-0.595865	-0.241247	-0.0597777	-0.580449	-0.24559	-0.108776	-0.662511
7.87	-0.242586	-0.075963	-0.607818	-0.240619	-0.065997	-0.589461	-0.244477	-0.11383	-0.668985
7.88	-0.241783	-0.0847008	-0.620436	-0.239926	-0.0726176	-0.598991	-0.243314	-0.118859	-0.675342
7.89	-0.240891	-0.0937118	-0.633337	-0.239166	-0.0794533	-0.608748	-0.2421	-0.123733	-0.681385
7.9	-0.239909	-0.10274	-0.646125	-0.238337	-0.0863125	-0.618436	-0.24084	-0.128316	-0.686906
7.91	-0.238837	-0.111522	-0.658399	-0.237441	-0.0930026	-0.627759	-0.239536	-0.132471	-0.691702
7.92	-0.23768	-0.119801	-0.669765	-0.236479	-0.0993357	-0.636432	-0.238193	-0.136064	-0.695574
7.93	-0.236444	-0.127325	-0.679849	-0.235456	-0.105133	-0.644189	-0.236817	-0.138967	-0.698335
7.94	-0.235137	-0.13386	-0.688304	-0.234379	-0.110231	-0.650785	-0.235416	-0.141065	-0.699818
7.95	-0.233771	-0.139199	-0.694825	-0.233254	-0.114484	-0.656008	-0.233999	-0.142256	-0.699879
7.96	-0.232358	-0.14316	-0.699156	-0.232092	-0.117768	-0.659683	-0.232575	-0.142456	-0.698406
7.97	-0.230913	-0.145601	-0.701098	-0.230903	-0.119987	-0.661676	-0.231154	-0.141603	-0.695318
7.98	-0.229452	-0.146415	-0.700513	-0.229697	-0.121069	-0.661896	-0.229746	-0.13966	-0.690574
7.99	-0.22799	-0.145543	-0.697334	-0.228485	-0.120976	-0.660299	-0.228364	-0.136613	-0.68417
8	-0.226547	-0.142969	-0.691562	-0.227281	-0.119698	-0.656891	-0.227018	-0.132478	-0.676148
8.01	-0.225137	-0.138722	-0.684194	-0.226096	-0.117258	-0.652646	-0.225718	-0.127297	-0.66751
8.02	-0.223778	-0.132879	-0.674446	-0.22494	-0.113707	-0.646738	-0.224475	-0.121137	-0.657455
8.03	-0.222484	-0.125559	-0.662529	-0.223825	-0.109126	-0.639309	-0.223299	-0.114094	-0.646143
8.04	-0.221271	-0.116923	-0.648708	-0.222761	-0.103622	-0.630537	-0.222196	-0.106286	-0.633768
8.05	-0.22015	-0.107167	-0.633308	-0.221755	-0.0973258	-0.620638	-0.221175	-0.0978516	-0.620554
8.06	-0.219131	-0.0965193	-0.616693	-0.220817	-0.0903885	-0.609854	-0.220241	-0.0889482	-0.606753
8.07	-0.218222	-0.0852332	-0.599264	-0.219949	-0.0829769	-0.598451	-0.219398	-0.0797465	-0.592632
8.08	-0.217428	-0.0735794	-0.581447	-0.219158	-0.0752696	-0.586709	-0.218647	-0.0704271	-0.578472
8.09	-0.216751	-0.0618397	-0.563677	-0.218445	-0.0674524	-0.574919	-0.217989	-0.0611752	-0.56456
8.1	-0.21619	-0.0502983	-0.546393	-0.217809	-0.0597135	-0.563368	-0.217423	-0.0521765	-0.551178
8.11	-0.215743	-0.0392348	-0.530018	-0.21725	-0.0522388	-0.552341	-0.216944	-0.043612	-0.538599
8.12	-0.215403	-0.028916	-0.514953	-0.216763	-0.0452069	-0.542108	-0.216548	-0.0356531	-0.527079
8.13	-0.215162	-0.019589	-0.501565	-0.216344	-0.0387853	-0.532917	-0.216229	-0.0284577	-0.516851
8.14	-0.215008	-0.0114741	-0.490177	-0.215985	-0.033126	-0.524991	-0.215977	-0.0221657	-0.508116
8.15	-0.214928	-0.00475935	-0.481057	-0.215678	-0.0283617	-0.518523	-0.215782	-0.0168954	-0.501043
8.16	-0.214908	0.000404421	-0.474415	-0.215415	-0.0246031	-0.513668	-0.215635	-0.012741	-0.495758
8.17	-0.214931	0.00390762	-0.470394	-0.215183	-0.0219364	-0.510543	-0.215524	-0.0097699	-0.492349
8.18	-0.21498	0.0056843	-0.469071	-0.214972	-0.0204213	-0.509221	-0.215436	-0.00802139	-0.490857
8.19	-0.215039	0.0057135	-0.470449	-0.214771	-0.0200902	-0.509735	-0.215359	-0.00750609	-0.49128
8.2	-0.215089	0.00401921	-0.474466	-0.214567	-0.0209477	-0.512073	-0.215282	-0.00820598	-0.493571
8.21	-0.215114	0.000669115	-0.480992	-0.214348	-0.0229709	-0.516183	-0.215191	-0.0100754	-0.497641
8.22	-0.215097	-0.00422804	-0.489834	-0.214104	-0.0261107	-0.521971	-0.215077	-0.0130428	-0.503364
8.23	-0.215025	-0.0105261	-0.500745	-0.213823	-0.0302934	-0.529307	-0.214927	-0.0170132	-0.510575
8.24	-0.214883	-0.0180465	-0.51343	-0.213495	-0.0354232	-0.538028	-0.214734	-0.0218713	-0.519085
8.25	-0.214661	-0.0265836	-0.527555	-0.213112	-0.0413846	-0.547943	-0.214488	-0.0274848	-0.528676
8.26	-0.214349	-0.0359113	-0.542759	-0.212665	-0.0480464	-0.558838	-0.214182	-0.033709	-0.539115
8.27	-0.213941	-0.0457899	-0.558663	-0.212149	-0.055265	-0.570483	-0.213812	-0.0403906	-0.550158
8.28	-0.213432	-0.0559732	-0.57488	-0.211559	-0.0628882	-0.582636	-0.213374	-0.0473721	-0.561558
8.29	-0.212821	-0.0662158	-0.591031	-0.210891	-0.0707597	-0.595052	-0.212864	-0.0544967	-0.573069
8.3	-0.212109	-0.0762802	-0.606752	-0.210143	-0.0787227	-0.607486	-0.212284	-0.0616121	-0.584456
8.31	-0.211297	-0.0859434	-0.621703	-0.209317	-0.0866245	-0.619704	-0.211633	-0.0685748	-0.595499
8.32	-0.210392	-0.0950032	-0.635582	-0.208412	-0.0943196	-0.631484	-0.210914	-0.0752537	-0.606001
8.33	-0.2094	-0.103284	-0.648129	-0.207431	-0.101674	-0.642624	-0.210129	-0.0815329	-0.615788
8.34	-0.20833	-0.110639	-0.659131	-0.20638	-0.108568	-0.652945	-0.209285	-0.0873149	-0.624718
8.35	-0.207191	-0.116958	-0.668434	-0.205262	-0.114899	-0.662299	-0.208385	-0.092522	-0.632678
8.36	-0.205994	-0.122165	-0.675938	-0.204084	-0.120583	-0.670565	-0.207437	-0.0970975	-0.639591
8.37	-0.204752	-0.126223	-0.681602	-0.202853	-0.125558	-0.677658	-0.206446	-0.101007	-0.645414
8.38	-0.203474	-0.129131	-0.685443	-0.201576	-0.129783	-0.683526	-0.205419	-0.104236	-0.650135
8.39	-0.202173	-0.130923	-0.687533	-0.20026	-0.13324	-0.688153	-0.204363	-0.106792	-0.653777
8.4	-0.200859	-0.13167	-0.687994	-0.198914	-0.135932	-0.691558	-0.203286	-0.108701	-0.656389
8.41	-0.199543	-0.13147	-0.686994	-0.197544	-0.137885	-0.693789	-0.202192	-0.110006	-0.658047
8.42	-0.198233	-0.130448	-0.684739	-0.196159	-0.139144	-0.694928	-0.201087	-0.110764	-0.658848
8.43	-0.196936	-0.128748	-0.681463	-0.194764	-0.139772	-0.695081	-0.199978	-0.111043	-0.658904
8.44	-0.19566	-0.126531	-0.677421	-0.193365	-0.139848	-0.694379	-0.198868	-0.110921	-0.658343
8.45	-0.194407	-0.123966	-0.672881	-0.191968	-0.139462	-0.692969	-0.197761	-0.11048	-0.657294
8.46	-0.193181	-0.121224	-0.66811	-0.190577	-0.138716	-0.691015	-0.196659	-0.109803	-0.655891
8.47	-0.191983	-0.118473	-0.663368	-0.189195	-0.137718	-0.688687	-0.195566	-0.108972	-0.654263
8.48	-0.190811	-0.115873	-0.658899	-0.187824	-0.136579	-0.686158	-0.19448	-0.108065	-0.652532
8.49	-0.189665	-0.113567	-0.65492	-0.186464	-0.135409	-0.683599	-0.193405	-0.107153	-0.650806
8.5	-0.188539	-0.11168	-0.651618	-0.185115	-0.134315	-0.681174	-0.192337	-0.106296	-0.649179
8.51	-0.187429	-0.110312	-0.649141	-0.183777	-0.133396	-0.679036	-0.191278	-0.105545	-0.647728
8.52	-0.186331	-0.109537	-0.647592	-0.182447	-0.132744	-0.677318	-0.190226	-0.104938	-0.646509
8.53	-0.185237	-0.109402	-0.647033	-0.181121	-0.132435	-0.676137	-0.189179	-0.1045	-0.645558
8.54	-0.184141	-0.10992	-0.647478	-0.179797	-0.132532	-0.675583	-0.188136	-0.104244	-0.644892
8.55	-0.183036	-0.111077	-0.648893	-0.178469	-0.133084	-0.675723	-0.187094	-0.104169	-0.644507
8.56	-0.181917	-0.112832	-0.651204	-0.177134	-0.134118	-0.676592	-0.186052	-0.104264	-0.644383
8.57	-0.180778	-0.115113	-0.654294	-0.175786	-0.135646	-0.678203	-0.185008	-0.104507	-0.644485
8.58	-0.179614	-0.117829	-0.658014	-0.17442	-0.137661	-0.680535	-0.183962	-0.104869	-0.644765
8.59	-0.178421	-0.120866	-0.662185	-0.173031	-0.140139	-0.683543	-0.182911	-0.105314	-0.645166
8.6	-0.177196	-0.124099	-0.666607	-0.171616	-0.143035	-0.687155	-0.181856	-0.105804	-0.645629
8.61	-0.175939	-0.127389	-0.671069	-0.170169	-0.146295	-0.691278	-0.180795	-0.106298	-0.646092
8.62	-0.174649	-0.130597	-0.675352	-0.168689	-0.149844	-0.695795	-0.17973	-0.106759	-0.646495
8.63	-0.173328	-0.133581	-0.679245	-0.167172	-0.153602	-0.700575	-0.17866	-0.107151	-0.646786
8.64	-0.171979	-0.13621	-0.682546	-0.165617	-0.157476	-0.705476	-0.177587	-0.107445	-0.646922
8.65	-0.170605	-0.138361	-0.685077	-0.164022	-0.161369	-0.710346	-0.176512	-0.107621	-0.646872
8.66	-0.169213	-0.13993	-0.686682	-0.16239	-0.16518	-0.71503	-0.175436	-0.107667	-0.646619
8.67	-0.167809	-0.140833	-0.687244	-0.16072	-0.168807	-0.719374	-0.174359	-0.10758	-0.646163
8.68	-0.166399	-0.141009	-0.68668	-0.159015	-0.172153	-0.723232	-0.173285	-0.10737	-0.64552
8.69	-0.164992	-0.140426	-0.68495	-0.157278	-0.175125	-0.726467	-0.172212	-0.107056	-0.644721
8.7	-0.163594	-0.139076	-0.682056	-0.155514	-0.17764	-0.728955	-0.171144	-0.106668	-0.643813
8.71	-0.162213	-0.136984	-0.678046	-0.153727	-0.179626	-0.730594	-0.170079	-0.106244	-0.642856
8.72	-0.160857	-0.134198	-0.673007	-0.151924	-0.181021	-0.7313	-0.169019	-0.10583	-0.641922
8.73	-0.159531	-0.130795	-0.667066	-0.150109	-0.181782	-0.731013	-0.167963	-0.10548	-0.641091
8.74	-0.158243	-0.126875	-0.660386	-0.14829	-0.18188	-0.729698	-0.166909	-0.105247	-0.640446
8.75	-0.156995	-0.122556	-0.653156	-0.146474	-0.181302	-0.727348	-0.165857	-0.105189	-0.640072
8.76	-0.155792	-0.117975	-0.645592	-0.144667	-0.180054	-0.723981	-0.164805	-0.105361	-0.64005
8.77	-0.154636	-0.113278	-0.637919	-0.142875	-0.178158	-0.71964	-0.16375	-0.105813	-0.640455
8.78	-0.153527	-0.108615	-0.630373	-0.141106	-0.175652	-0.714396	-0.162688	-0.10659	-0.64135
8.79	-0.152464	-0.10414	-0.623185	-0.139364	-0.17259	-0.708339	-0.161617	-0.107726	-0.642784
8.8	-0.151443	-0.0999991	-0.616578	-0.137656	-0.169039	-0.701582	-0.160532	-0.109246	-0.644787
8.81	-0.150462	-0.0963289	-0.610755	-0.135985	-0.16508	-0.694254	-0.159431	-0.111161	-0.647371
8.82	-0.149515	-0.0932503	-0.605895	-0.134356	-0.160801	-0.686497	-0.158308	-0.113467	-0.650525
8.83	-0.148595	-0.0908645	-0.602143	-0.13277	-0.156298	-0.678464	-0.15716	-0.116147	-0.654216
8.84	-0.147695	-0.0892492	-0.599607	-0.13123	-0.151673	-0.670312	-0.155984	-0.119167	-0.658387
8.85	-0.146808	-0.0884556	-0.598353	-0.129737	-0.147028	-0.662203	-0.154776	-0.122482	-0.662961
8.86	-0.145924	-0.0885066	-0.598405	-0.12829	-0.142467	-0.654293	-0.153534	-0.126029	-0.66784
8.87	-0.145035	-0.089396	-0.59974	-0.126887	-0.138089	-0.646732	-0.152255	-0.129735	-0.672908
8.88	-0.144133	-0.0910885	-0.60229	-0.125527	-0.133986	-0.639662	-0.150939	-0.133519	-0.678038
8.89	-0.143211	-0.0935213	-0.605947	-0.124206	-0.130246	-0.633209	-0.149585	-0.137289	-0.683088
8.9	-0.142261	-0.0966057	-0.610564	-0.122921	-0.126944	-0.627484	-0.148194	-0.14095	-0.687914
8.91	-0.141277	-0.100231	-0.615961	-0.121666	-0.124144	-0.622579	-0.146767	-0.144407	-0.692371
8.92	-0.140255	-0.104268	-0.621933	-0.120436	-0.121897	-0.618565	-0.145307	-0.147566	-0.696317
8.93	-0.139191	-0.108574	-0.628254	-0.119226	-0.120243	-0.615491	-0.143817	-0.150338	-0.699623
8.94	-0.138083	-0.112998	-0.63469	-0.11803	-0.119204	-0.613384	-0.142302	-0.152642	-0.70217
8.95	-0.136931	-0.117387	-0.641003	-0.11684	-0.118789	-0.61225	-0.140766	-0.154411	-0.703862
8.96	-0.135736	-0.12159	-0.646964	-0.115652	-0.118995	-0.612072	-0.139216	-0.155591	-0.704626
8.97	-0.134501	-0.125465	-0.652358	-0.114459	-0.119803	-0.612812	-0.137657	-0.156146	-0.704415
8.98	-0.133229	-0.128885	-0.656995	-0.113254	-0.121183	-0.614415	-0.136095	-0.156058	-0.703211
8.99	-0.131925	-0.13174	-0.660716	-0.112033	-0.123093	-0.61681	-0.134538	-0.15533	-0.701028
9	-0.130596	-0.133947	-0.6634	-0.110791	-0.125483	-0.619909	-0.132991	-0.153986	-0.697913
9.01	-0.129249	-0.135446	-0.664966	-0.109522	-0.128296	-0.623617	-0.13146	-0.152069	-0.693943
9.02	-0.12789	-0.136209	-0.665383	-0.108224	-0.131465	-0.627829	-0.129951	-0.149645	-0.689225
9.03	-0.126527	-0.136238	-0.664664	-0.106892	-0.134923	-0.632434	-0.128469	-0.146797	-0.683896
9.04	-0.125168	-0.135567	-0.662874	-0.105525	-0.1386	-0.63732	-0.127017	-0.143624	-0.678114
9.05	-0.123818	-0.134259	-0.660119	-0.10412	-0.142424	-0.642376	-0.125597	-0.140242	-0.67206
9.06	-0.122485	-0.132409	-0.656554	-0.102676	-0.146328	-0.647494	-0.124212	-0.136774	-0.665928
9.07	-0.121172	-0.130135	-0.652369	-0.101194	-0.150245	-0.652573	-0.122862	-0.133354	-0.659922
9.08	-0.119883	-0.127577	-0.647785	-0.0996719	-0.154114	-0.657517	-0.121545	-0.130117	-0.654249
9.09	-0.118621	-0.124895	-0.64305	-0.0981119	-0.15788	-0.662244	-0.120259	-0.127199	-0.649114
9.1	-0.117385	-0.122259	-0.638427	-0.096515	-0.161492	-0.666678	-0.119	-0.12473	-0.644713
9.11	-0.116175	-0.119845	-0.634184	-0.0948829	-0.16491	-0.670758	-0.117762	-0.122834	-0.641226
9.12	-0.114987	-0.117829	-0.63059	-0.0932178	-0.168098	-0.674435	-0.116541	-0.121621	-0.638812
9.13	-0.113817	-0.116382	-0.627896	-0.091522	-0.17103	-0.67767	-0.115328	-0.121184	-0.637607
9.14	-0.112657	-0.115661	-0.626336	-0.0897983	-0.173686	-0.680437	-0.114115	-0.1216	-0.637715
9.15	-0.111501	-0.115806	-0.626113	-0.0880494	-0.176053	-0.682722	-0.112893	-0.122924	-0.639205
9.16	-0.110338	-0.116931	-0.627389	-0.0862784	-0.178125	-0.684518	-0.111653	-0.125188	-0.642115
9.17	-0.109159	-0.119126	-0.630285	-0.0844881	-0.179902	-0.685831	-0.110386	-0.1284	-0.646441
9.18	-0.107952	-0.122447	-0.63487	-0.0826815	-0.181387	-0.68667	-0.109082	-0.132545	-0.652145
9.19	-0.106706	-0.126916	-0.641162	-0.0808615	-0.18259	-0.687053	-0.107732	-0.137584	-0.659153
9.2	-0.10541	-0.132521	-0.649124	-0.0790308	-0.18352	-0.687002	-0.106328	-0.143453	-0.667355
9.21	-0.104052	-0.139214	-0.658666	-0.0771922	-0.184193	-0.686541	-0.104861	-0.150071	-0.676613
9.22	-0.102623	-0.146912	-0.669643	-0.075348	-0.184622	-0.685698	-0.103325	-0.157337	-0.686761
9.23	-0.101111	-0.155502	-0.681867	-0.0735007	-0.184824	-0.6845	-0.101713	-0.165134	-0.697611
9.24	-0.0995103	-0.16484	-0.695103	-0.0716524	-0.184814	-0.682975	-0.100021	-0.173336	-0.708959
9.25	-0.0978129	-0.174758	-0.709084	-0.0698052	-0.184609	-0.68115	-0.0982453	-0.181806	-0.720592
9.26	-0.0960141	-0.185071	-0.723515	-0.067961	-0.184222	-0.679051	-0.0963844	-0.190406	-0.732293
9.27	-0.094111	-0.195577	-0.738084	-0.0661215	-0.183669	-0.676704	-0.0944374	-0.198996	-0.743846
9.28	-0.0921028	-0.206071	-0.752472	-0.0642884	-0.182964	-0.674132	-0.0924051	-0.207441	-0.755046
9.29	-0.0899905	-0.216345	-0.766363	-0.0624629	-0.182122	-0.671361	-0.0902897	-0.215616	-0.765701
9.3	-0.0877774	-0.2262	-0.779452	-0.0606465	-0.181155	-0.668413	-0.0880943	-0.223405	-0.77564
9.31	-0.0854687	-0.235448	-0.791462	-0.0588404	-0.18008	-0.665314	-0.0858234	-0.230709	-0.784717
9.32	-0.0830713	-0.243921	-0.802143	-0.0570454	-0.178912	-0.662089	-0.0834822	-0.237447	-0.792814
9.33	-0.0805936	-0.251477	-0.811289	-0.0552626	-0.177669	-0.658767	-0.0810768	-0.243554	-0.799843
9.34	-0.0780454	-0.258002	-0.818739	-0.0534924	-0.176371	-0.65538	-0.0786136	-0.248991	-0.80575
9.35	-0.0754374	-0.263415	-0.824388	-0.0517354	-0.175041	-0.651964	-0.0760994	-0.253736	-0.810516
9.36	-0.0727811	-0.267671	-0.828183	-0.0499918	-0.173704	-0.648558	-0.0735413	-0.257792	-0.814154
9.37	-0.0700881	-0.270763	-0.830129	-0.0482615	-0.172389	-0.645206	-0.070946	-0.26118	-0.816707
9.38	-0.0673699	-0.272719	-0.83029	-0.046544	-0.17113	-0.64196	-0.06832	-0.263943	-0.818251
9.39	-0.0646375	-0.273605	-0.828783	-0.0448388	-0.169961	-0.638871	-0.0656692	-0.266139	-0.818884
9.4	-0.0619012	-0.27352	-0.825776	-0.0431446	-0.168922	-0.635999	-0.0629991	-0.267842	-0.81873
9.41	-0.0591701	-0.272592	-0.821481	-0.04146	-0.168053	-0.633405	-0.060314	-0.269138	-0.817925
9.42	-0.0564518	-0.270977	-0.816146	-0.039783	-0.167399	-0.631152	-0.0576176	-0.27012	-0.816621
9.43	-0.0537525	-0.268847	-0.81005	-0.0381113	-0.167003	-0.629304	-0.0549125	-0.270888	-0.814974
9.44	-0.0510762	-0.266391	-0.803489	-0.0364421	-0.166909	-0.627925	-0.0522004	-0.271541	-0.813141
9.45	-0.0484253	-0.263806	-0.796766	-0.0347722	-0.167159	-0.627074	-0.0494819	-0.272179	-0.811273
9.46	-0.0458	-0.261286	-0.790184	-0.0330979	-0.167794	-0.626808	-0.0467567	-0.272893	-0.809512
9.47	-0.0431989	-0.259022	-0.784032	-0.0314151	-0.168849	-0.627175	-0.0440237	-0.273767	-0.807985
9.48	-0.0406184	-0.25719	-0.778576	-0.0297196	-0.170354	-0.628216	-0.0412808	-0.274873	-0.806801
9.49	-0.0380533	-0.255947	-0.774052	-0.0280066	-0.172334	-0.62996	-0.0385255	-0.276269	-0.806043
9.5	-0.0354972	-0.255427	-0.770652	-0.0262715	-0.174803	-0.632423	-0.0357545	-0.277998	-0.805774
9.51	-0.0329422	-0.255733	-0.768936	-0.0245091	-0.17777	-0.636019	-0.0329645	-0.280086	-0.806437
9.52	-0.0303797	-0.256937	-0.76859	-0.0227146	-0.181231	-0.640327	-0.0301518	-0.28254	-0.807629
9.53	-0.0278006	-0.259074	-0.769653	-0.0208831	-0.185174	-0.645318	-0.0273127	-0.285352	-0.809331
9.54	-0.0251953	-0.262144	-0.772112	-0.0190098	-0.189574	-0.650949	-0.0244438	-0.288496	-0.811497
9.55	-0.0225549	-0.26611	-0.775895	-0.0170904	-0.194397	-0.657159	-0.021542	-0.29193	-0.814059
9.56	-0.0198706	-0.270901	-0.78088	-0.0151208	-0.199598	-0.663875	-0.0186046	-0.295599	-0.816928
9.57	-0.0171347	-0.276414	-0.786896	-0.0130975	-0.205124	-0.671007	-0.0156297	-0.299437	-0.82
9.58	-0.0143405	-0.282517	-0.793729	-0.0110176	-0.210912	-0.678455	-0.0126158	-0.303368	-0.823154
9.59	-0.0114831	-0.289053	-0.801132	-0.00887885	-0.216891	-0.686107	-0.00956245	-0.307311	-0.826266
9.6	-0.0085588	-0.29585	-0.808834	-0.00667963	-0.222987	-0.693845	-0.00647	-0.311181	-0.829206
9.61	-0.00556602	-0.302722	-0.816545	-0.0044192	-0.229119	-0.701546	-0.00333956	-0.314893	-0.831845
9.62	-0.00250494	-0.309478	-0.823974	-0.00209759	-0.235207	-0.709084	-0.00017313	-0.318366	-0.83406
9.63	0.000622335	-0.315931	-0.830834	0.00028433	-0.24117	-0.716337	0.00302652	-0.321525	-0.835741
9.64	0.00381186	-0.321899	-0.836853	0.00272493	-0.246929	-0.723186	0.0062559	-0.324301	-0.836788
9.65	0.00705796	-0.327219	-0.841786	0.0052218	-0.252412	-0.729523	0.00951089	-0.32664	-0.837122
9.66	0.0103534	-0.331744	-0.845422	0.00777183	-0.257551	-0.73525	0.0127869	-0.328497	-0.836683
9.67	0.0136896	-0.335358	-0.847593	0.0103713	-0.262288	-0.740283	0.0160789	-0.329844	-0.835433
9.68	0.017057	-0.337973	-0.848179	0.0130159	-0.266576	-0.744554	0.0193818	-0.330665	-0.833359
9.69	0.0204454	-0.339536	-0.847114	0.015701	-0.270379	-0.748018	0.0226903	-0.330962	-0.83047
9.7	0.023844	-0.340028	-0.844385	0.0184216	-0.273674	-0.750645	0.0259992	-0.330752	-0.8268
9.71	0.0272422	-0.339467	-0.840039	0.0211726	-0.276452	-0.75243	0.0293036	-0.330066	-0.822403
9.72	0.0306298	-0.33791	-0.834174	0.0239487	-0.278717	-0.753388	0.0325989	-0.328947	-0.817356
9.73	0.0339972	-0.335443	-0.826942	0.0267451	-0.280488	-0.753553	0.0358811	-0.327453	-0.811752
9.74	0.0373358	-0.332187	-0.81854	0.0295567	-0.281795	-0.752982	0.0391467	-0.32565	-0.805698
9.75	0.0406386	-0.328289	-0.809205	0.0323794	-0.282682	-0.751747	0.0423931	-0.323613	-0.799312
9.76	0.0438998	-0.323917	-0.799206	0.035209	-0.283202	-0.749937	0.0456182	-0.32142	-0.792721
9.77	0.0471158	-0.319257	-0.788833	0.0380422	-0.283417	-0.747654	0.0488211	-0.319156	-0.786053
9.78	0.0502845	-0.314504	-0.778388	0.0408763	-0.283399	-0.745009	0.0520012	-0.316901	-0.779435
9.79	0.053406	-0.309853	-0.768175	0.0437094	-0.283219	-0.742117	0.0551592	-0.314737	-0.772991
9.8	0.0564823	-0.3055	-0.758488	0.0465402	-0.282954	-0.739098	0.0582963	-0.31274	-0.766836
9.81	0.0595174	-0.301625	-0.749602	0.0493683	-0.282679	-0.736067	0.0614146	-0.310978	-0.761072
9.82	0.0625168	-0.298396	-0.741763	0.0521938	-0.282466	-0.733137	0.0645167	-0.309513	-0.755789
9.83	0.0654877	-0.295954	-0.735178	0.0550178	-0.282383	-0.730407	0.0676058	-0.308394	-0.751059
9.84	0.0684387	-0.294413	-0.730012	0.0578419	-0.282488	-0.727968	0.0706856	-0.307661	-0.746937
9.85	0.0713791	-0.293857	-0.726376	0.0606682	-0.282831	-0.725892	0.0737602	-0.307341	-0.743458
9.86	0.0743191	-0.294332	-0.724328	0.0634992	-0.283451	-0.724234	0.0768337	-0.307449	-0.74064
9.87	0.077269	-0.295851	-0.723869	0.066338	-0.284374	-0.72303	0.0799104	-0.307988	-0.738478
9.88	0.0802393	-0.298387	-0.724945	0.0691876	-0.285613	-0.722296	0.0829947	-0.308948	-0.736954
9.89	0.0832397	-0.301879	-0.727446	0.0720511	-0.287167	-0.722024	0.0860905	-0.31031	-0.736029
9.9	0.0862795	-0.306233	-0.731211	0.0749317	-0.289021	-0.722189	0.0892019	-0.312043	-0.735653
9.91	0.0893667	-0.311323	-0.736035	0.0778323	-0.291149	-0.722743	0.0923323	-0.314111	-0.735762
9.92	0.0925077	-0.316997	-0.741676	0.0807553	-0.293511	-0.723624	0.0954849	-0.316468	-0.736282
9.93	0.0957078	-0.323085	-0.747862	0.0837029	-0.296058	-0.724752	0.0986623	-0.319066	-0.737133
9.94	0.09897	-0.3294	-0.754302	0.0866767	-0.298733	-0.726035	0.101867	-0.32185	-0.738231
9.95	0.102296	-0.335748	-0.760696	0.0896776	-0.301471	-0.727374	0.1051	-0.324768	-0.73949
9.96	0.105684	-0.341935	-0.766745	0.0927059	-0.304204	-0.728664	0.108362	-0.327765	-0.740825
9.97	0.109133	-0.347772	-0.772162	0.0957612	-0.306864	-0.729799	0.111655	-0.330789	-0.742155
9.98	0.112638	-0.353082	-0.776684	0.0988425	-0.309381	-0.730675	0.114978	-0.333792	-0.743407
9.99	0.116192	-0.357709	-0.780078	0.101948	-0.311692	-0.731196	0.11833	-0.33673	-0.744513
10	0.119789	-0.36152	-0.78215	0.105075	-0.313738	-0.731276	0.121712	-0.339565	-0.745415
10.01	0.123419	-0.36441	-0.782755	0.108221	-0.31547	-0.730844	0.125121	-0.342263	-0.746064
10.02	0.127074	-0.36631	-0.781799	0.111383	-0.316849	-0.729844	0.128556	-0.344798	-0.746424
10.03	0.130742	-0.367183	-0.779242	0.114557	-0.317846	-0.728239	0.132016	-0.347152	-0.746466
10.04	0.134414	-0.36703	-0.775101	0.117739	-0.318448	-0.726014	0.135498	-0.349311	-0.746174
10.05	0.138079	-0.365889	-0.769451	0.120924	-0.318654	-0.723174	0.139001	-0.351269	-0.74554
10.06	0.141728	-0.363833	-0.762417	0.12411	-0.318478	-0.719745	0.142523	-0.353023	-0.744565
10.07	0.145353	-0.360967	-0.754176	0.127293	-0.317946	-0.715774	0.146061	-0.354579	-0.743258
10.08	0.148945	-0.357426	-0.744945	0.130468	-0.317098	-0.711328	0.149614	-0.355942	-0.741633
10.09	0.152499	-0.35337	-0.734981	0.133633	-0.315986	-0.70649	0.153179	-0.357124	-0.739711
10.1	0.156011	-0.348976	-0.724561	0.136787	-0.314669	-0.701358	0.156755	-0.358139	-0.737513
10.11	0.159478	-0.344434	-0.713984	0.139926	-0.313218	-0.696038	0.160341	-0.358999	-0.735064
10.12	0.1629	-0.339942	-0.703551	0.143051	-0.311705	-0.690648	0.163935	-0.359721	-0.73239
10.13	0.166278	-0.335693	-0.693562	0.14616	-0.310208	-0.685304	0.167535	-0.36032	-0.729515
10.14	0.169615	-0.331877	-0.6843	0.149255	-0.308803	-0.680125	0.171141	-0.360809	-0.726464
10.15	0.172917	-0.328666	-0.676024	0.152337	-0.307564	-0.675222	0.174751	-0.361201	-0.723258
10.16	0.176191	-0.326213	-0.668957	0.155407	-0.30656	-0.670698	0.178364	-0.36151	-0.719917
10.17	0.179444	-0.324645	-0.663284	0.158469	-0.305852	-0.666642	0.18198	-0.361745	-0.716459
10.18	0.182687	-0.32406	-0.659138	0.161525	-0.305491	-0.663128	0.185599	-0.361917	-0.712901
10.19	0.185929	-0.32452	-0.656602	0.16458	-0.305516	-0.660211	0.189218	-0.362034	-0.709256
10.2	0.18918	-0.326052	-0.6557	0.167636	-0.305953	-0.657923	0.192839	-0.362105	-0.705537
10.21	0.192453	-0.328647	-0.656402	0.1707	-0.306814	-0.656278	0.19646	-0.362136	-0.701758
10.22	0.195757	-0.332259	-0.658619	0.173774	-0.308094	-0.655262	0.200081	-0.362137	-0.697931
10.23	0.199101	-0.336805	-0.662212	0.176863	-0.309777	-0.654843	0.203702	-0.362116	-0.694072
10.24	0.202495	-0.342172	-0.66699	0.17997	-0.311831	-0.654965	0.207323	-0.362084	-0.690196
10.25	0.205946	-0.348215	-0.672721	0.1831	-0.314209	-0.655552	0.210944	-0.362053	-0.686321
10.26	0.209461	-0.354769	-0.67914	0.186255	-0.316856	-0.656514	0.214564	-0.362035	-0.682468
10.27	0.213043	-0.361646	-0.685954	0.189438	-0.319705	-0.657744	0.218185	-0.362048	-0.678662
10.28	0.216694	-0.36865	-0.692855	0.19265	-0.322682	-0.659126	0.221805	-0.362109	-0.674929
10.29	0.220415	-0.375575	-0.699528	0.195892	-0.325708	-0.660538	0.225427	-0.362237	-0.671298
10.3	0.224204	-0.38222	-0.705664	0.199164	-0.328703	-0.661855	0.22905	-0.362452	-0.667799
10.31	0.228058	-0.388387	-0.710967	0.202465	-0.331587	-0.662956	0.232676	-0.362777	-0.664463
10.32	0.23197	-0.393895	-0.715166	0.205794	-0.334282	-0.663725	0.236306	-0.363231	-0.661321
10.33	0.235933	-0.398581	-0.718023	0.20915	-0.33672	-0.664058	0.239941	-0.363835	-0.658402
10.34	0.239938	-0.402308	-0.719338	0.212528	-0.338839	-0.663863	0.243583	-0.364607	-0.65573
10.35	0.243975	-0.404966	-0.71896	0.215925	-0.340586	-0.663069	0.247234	-0.365562	-0.653326
10.36	0.248033	-0.406479	-0.716788	0.219338	-0.341925	-0.661621	0.250895	-0.36671	-0.651203
10.37	0.252101	-0.406804	-0.712774	0.222762	-0.342829	-0.659488	0.254568	-0.368055	-0.649365
10.38	0.256165	-0.405934	-0.706926	0.226193	-0.34329	-0.656663	0.258256	-0.369596	-0.647805
10.39	0.260215	-0.403895	-0.699303	0.229626	-0.343312	-0.653158	0.261961	-0.371324	-0.646507
10.4	0.264239	-0.400751	-0.690018	0.233057	-0.342915	-0.649011	0.265683	-0.37322	-0.645441
10.41	0.268227	-0.396592	-0.679228	0.236483	-0.342131	-0.64428	0.269425	-0.375259	-0.644564
10.42	0.272168	-0.391537	-0.667132	0.239899	-0.341008	-0.63904	0.273188	-0.377405	-0.64382
10.43	0.276055	-0.385731	-0.653963	0.243302	-0.339603	-0.633386	0.276973	-0.379614	-0.643139
10.44	0.27988	-0.379333	-0.639979	0.24669	-0.337981	-0.627422	0.28078	-0.381833	-0.642439
10.45	0.28364	-0.372517	-0.625452	0.250061	-0.336215	-0.621263	0.28461	-0.384002	-0.641629
10.46	0.28733	-0.365462	-0.610666	0.253414	-0.334381	-0.615027	0.28846	-0.386053	-0.640605
10.47	0.290949	-0.358349	-0.595898	0.256748	-0.332557	-0.608835	0.29233	-0.387914	-0.639258
10.48	0.294497	-0.351352	-0.581418	0.260065	-0.330819	-0.602801	0.296217	-0.38951	-0.637476
10.49	0.297976	-0.344634	-0.567473	0.263365	-0.329237	-0.597035	0.300119	-0.390761	-0.635143
10.5	0.301391	-0.338343	-0.554285	0.26665	-0.327877	-0.591631	0.304031	-0.391593	-0.632147
10.51	0.304745	-0.332604	-0.54204	0.269923	-0.326793	-0.586672	0.307949	-0.391929	-0.628381
10.52	0.308045	-0.327521	-0.530886	0.273187	-0.326029	-0.582219	0.311867	-0.391702	-0.623746
10.53	0.311298	-0.323167	-0.520927	0.276445	-0.325617	-0.578317	0.31578	-0.390851	-0.618159
10.54	0.314511	-0.319588	-0.512221	0.2797	-0.325575	-0.574986	0.319682	-0.389323	-0.61155
10.55	0.317692	-0.316801	-0.504784	0.282957	-0.325904	-0.572226	0.323564	-0.387079	-0.603869
10.56	0.320849	-0.314794	-0.498582	0.286219	-0.326596	-0.570016	0.327421	-0.384095	-0.595089
10.57	0.32399	-0.313526	-0.493543	0.28949	-0.327625	-0.568311	0.331244	-0.38036	-0.585205
10.58	0.327122	-0.312932	-0.489555	0.292773	-0.328955	-0.567049	0.335025	-0.375882	-0.574241
10.59	0.33025	-0.312925	-0.486473	0.29607	-0.330536	-0.566152	0.338759	-0.370684	-0.562244
10.6	0.333382	-0.313398	-0.484128	0.299384	-0.332311	-0.565528	0.342437	-0.364809	-0.549291
10.61	0.336519	-0.314234	-0.482331	0.302716	-0.334216	-0.565076	0.346053	-0.358317	-0.535484
10.62	0.339667	-0.315305	-0.48088	0.306068	-0.336181	-0.564686	0.349601	-0.351284	-0.520949
10.63	0.342826	-0.316481	-0.479573	0.30944	-0.338136	-0.564251	0.353077	-0.343803	-0.505835
10.64	0.345996	-0.317633	-0.478211	0.31283	-0.340011	-0.563663	0.356476	-0.335979	-0.490313
10.65	0.349178	-0.31864	-0.476609	0.316239	-0.34174	-0.562822	0.359795	-0.327931	-0.474568
10.66	0.352368	-0.319392	-0.474601	0.319664	-0.343263	-0.561639	0.363034	-0.319786	-0.458799
10.67	0.355564	-0.319795	-0.472048	0.323103	-0.344529	-0.560039	0.366191	-0.311679	-0.443212
10.68	0.358762	-0.319775	-0.468839	0.326554	-0.345497	-0.557964	0.369268	-0.303745	-0.428016
10.69	0.361958	-0.319278	-0.464904	0.330012	-0.346139	-0.555374	0.372267	-0.296123	-0.41342
10.7	0.365146	-0.318279	-0.460204	0.333475	-0.34644	-0.552253	0.375191	-0.288945	-0.399622
10.71	0.368321	-0.316772	-0.454745	0.33694	-0.3464	-0.548605	0.378047	-0.282341	-0.386811
10.72	0.371479	-0.314781	-0.448567	0.340402	-0.346032	-0.544456	0.38084	-0.276426	-0.375158
10.73	0.374615	-0.312352	-0.441749	0.343859	-0.345364	-0.539853	0.383578	-0.271307	-0.364813
10.74	0.377725	-0.309554	-0.434403	0.347308	-0.344436	-0.534863	0.386269	-0.267072	-0.355901
10.75	0.380805	-0.306476	-0.426672	0.350747	-0.343301	-0.52957	0.388923	-0.263793	-0.348518
10.76	0.383854	-0.303223	-0.418722	0.354173	-0.34202	-0.524072	0.391548	-0.261523	-0.34273
10.77	0.386869	-0.299914	-0.410735	0.357587	-0.340663	-0.518477	0.394156	-0.260294	-0.33857
10.78	0.389852	-0.296675	-0.402906	0.360987	-0.339305	-0.5129	0.396757	-0.260115	-0.336038
10.79	0.392803	-0.293636	-0.395435	0.364373	-0.338022	-0.50746	0.399362	-0.260976	-0.335099
10.8	0.395726	-0.290928	-0.388516	0.367747	-0.336889	-0.50227	0.40198	-0.262843	-0.335687
10.81	0.398623	-0.288673	-0.382333	0.371111	-0.335981	-0.497441	0.404622	-0.265664	-0.337706
10.82	0.401501	-0.286985	-0.377053	0.374468	-0.335363	-0.49307	0.407296	-0.269366	-0.34103
10.83	0.404365	-0.285964	-0.372819	0.37782	-0.335093	-0.489241	0.410012	-0.273859	-0.34551
10.84	0.407223	-0.28569	-0.369745	0.381171	-0.335217	-0.48602	0.412775	-0.279042	-0.350974
10.85	0.410081	-0.286225	-0.367913	0.384525	-0.335769	-0.483453	0.415594	-0.284796	-0.357234
10.86	0.41295	-0.287604	-0.367366	0.387887	-0.336769	-0.481562	0.418473	-0.290999	-0.364091
10.87	0.415836	-0.289842	-0.368111	0.391262	-0.33822	-0.480346	0.421415	-0.297518	-0.371338
10.88	0.418749	-0.292925	-0.370116	0.394653	-0.34011	-0.47978	0.424423	-0.304222	-0.378766
10.89	0.421697	-0.296815	-0.373309	0.398065	-0.34241	-0.479813	0.427499	-0.310976	-0.386169
10.9	0.424688	-0.30145	-0.377583	0.401502	-0.345079	-0.480375	0.430642	-0.317652	-0.393347
10.91	0.427728	-0.306747	-0.382799	0.404968	-0.348058	-0.48137	0.433851	-0.324126	-0.400115
10.92	0.430824	-0.312601	-0.388785	0.408464	-0.351278	-0.482688	0.437124	-0.330286	-0.4063
10.93	0.433981	-0.318892	-0.39535	0.411993	-0.354659	-0.484204	0.440456	-0.336027	-0.411751
10.94	0.437203	-0.325485	-0.40228	0.415557	-0.358113	-0.485778	0.443842	-0.341262	-0.416338
10.95	0.440491	-0.332237	-0.409352	0.419155	-0.361547	-0.487268	0.447279	-0.345914	-0.419953
10.96	0.443848	-0.339	-0.416337	0.422788	-0.364864	-0.488528	0.450758	-0.349926	-0.422514
10.97	0.447271	-0.345624	-0.423005	0.426452	-0.36797	-0.489413	0.454275	-0.353253	-0.423967
10.98	0.450759	-0.351963	-0.429135	0.430146	-0.370773	-0.489786	0.457821	-0.355869	-0.424279
10.99	0.454308	-0.357879	-0.434519	0.433866	-0.373188	-0.489521	0.461389	-0.357761	-0.423443
11	0.457914	-0.363243	-0.438968	0.437608	-0.375137	-0.488507	0.464973	-0.358934	-0.421477
11.01	0.461571	-0.367943	-0.442521	0.441367	-0.376555	-0.486854	0.468566	-0.359404	-0.418622
11.02	0.465271	-0.37188	-0.444835	0.445137	-0.377389	-0.484285	0.472159	-0.3592	-0.414729
11.03	0.469005	-0.374977	-0.445803	0.448912	-0.3776	-0.480751	0.475747	-0.358361	-0.409868
11.04	0.472767	-0.377177	-0.445349	0.452686	-0.377166	-0.476225	0.479324	-0.356936	-0.404121
11.05	0.476546	-0.378443	-0.443432	0.456453	-0.37608	-0.470708	0.482884	-0.354979	-0.397581
11.06	0.480332	-0.37876	-0.440043	0.460206	-0.374349	-0.464221	0.486422	-0.352547	-0.390346
11.07	0.484118	-0.378135	-0.435206	0.463938	-0.371998	-0.45681	0.489933	-0.349702	-0.382516
11.08	0.487892	-0.376591	-0.428974	0.467643	-0.369064	-0.448545	0.493415	-0.346506	-0.374191
11.09	0.491646	-0.374174	-0.421427	0.471317	-0.365598	-0.43951	0.496862	-0.343017	-0.365469
11.1	0.495372	-0.370942	-0.412671	0.474954	-0.361661	-0.429807	0.500274	-0.339293	-0.356439
11.11	0.499062	-0.366967	-0.402828	0.478549	-0.357322	-0.419549	0.503647	-0.335386	-0.347188
11.12	0.502709	-0.362333	-0.392037	0.482099	-0.352656	-0.408858	0.506981	-0.331345	-0.337791
11.13	0.506307	-0.357131	-0.380447	0.485601	-0.347743	-0.397859	0.510274	-0.32721	-0.328313
11.14	0.50985	-0.351455	-0.368213	0.489053	-0.34266	-0.386678	0.513525	-0.323018	-0.31881
11.15	0.513335	-0.345403	-0.35549	0.492454	-0.337486	-0.375434	0.516734	-0.318796	-0.309326
11.16	0.516757	-0.339069	-0.342429	0.495802	-0.332292	-0.364241	0.519901	-0.314567	-0.299897
11.17	0.520115	-0.332546	-0.329176	0.499099	-0.327146	-0.3532	0.523025	-0.310348	-0.290548
11.18	0.523407	-0.325918	-0.315863	0.502345	-0.322103	-0.342396	0.526107	-0.306148	-0.281294
11.19	0.526633	-0.319264	-0.302611	0.505542	-0.31721	-0.3319	0.529148	-0.301975	-0.272145
11.2	0.529793	-0.312649	-0.289523	0.50869	-0.312502	-0.321761	0.532147	-0.297831	-0.263103
11.21	0.532886	-0.306132	-0.276685	0.511792	-0.308	-0.312012	0.535104	-0.293713	-0.254166
11.22	0.535916	-0.299756	-0.264165	0.514851	-0.303714	-0.302662	0.538021	-0.289618	-0.245329
11.23	0.538882	-0.293556	-0.252011	0.517867	-0.299641	-0.293704	0.540897	-0.285542	-0.236582
11.24	0.541787	-0.287553	-0.240255	0.520844	-0.295764	-0.285108	0.543732	-0.281477	-0.227917
11.25	0.544633	-0.281757	-0.228909	0.523783	-0.292056	-0.276831	0.546526	-0.277419	-0.219323
11.26	0.547423	-0.27617	-0.21797	0.526685	-0.28848	-0.268813	0.54928	-0.273362	-0.210793
11.27	0.550157	-0.270782	-0.207422	0.529552	-0.284992	-0.260983	0.551993	-0.269299	-0.202317
11.28	0.552839	-0.265576	-0.197236	0.532385	-0.281538	-0.253261	0.554666	-0.265226	-0.193888
11.29	0.555469	-0.260529	-0.187375	0.535183	-0.278064	-0.245561	0.557297	-0.26114	-0.185501
11.3	0.55805	-0.255614	-0.177791	0.537946	-0.274512	-0.237794	0.559888	-0.257036	-0.17715
11.31	0.560582	-0.250798	-0.168435	0.540673	-0.270825	-0.229876	0.562438	-0.252911	-0.16883
11.32	0.563066	-0.246047	-0.159253	0.543361	-0.266948	-0.221723	0.564946	-0.24876	-0.160535
11.33	0.565502	-0.241327	-0.150192	0.54601	-0.26283	-0.213261	0.567413	-0.24458	-0.152257
11.34	0.567892	-0.236604	-0.141197	0.548617	-0.258428	-0.204428	0.569837	-0.240363	-0.143988
11.35	0.570234	-0.231844	-0.13222	0.551178	-0.253706	-0.195172	0.57222	-0.236101	-0.135715
11.36	0.572528	-0.227017	-0.123212	0.55369	-0.248638	-0.185458	0.574559	-0.231782	-0.127421
11.37	0.574774	-0.222094	-0.114133	0.556149	-0.243205	-0.175266	0.576855	-0.227394	-0.119086
11.38	0.57697	-0.21705	-0.104944	0.558552	-0.237404	-0.164592	0.579106	-0.222917	-0.110683
11.39	0.579114	-0.211863	-0.0956128	0.560896	-0.231238	-0.153449	0.581313	-0.218332	-0.102184
11.4	0.581206	-0.206513	-0.0861133	0.563176	-0.224723	-0.141867	0.583472	-0.213614	-0.0935506
11.41	0.583244	-0.200986	-0.0764233	0.565389	-0.217885	-0.129891	0.585584	-0.208735	-0.0847444
11.42	0.585225	-0.195267	-0.0665253	0.567532	-0.210758	-0.117577	0.587646	-0.203665	-0.0757215
11.43	0.587148	-0.189345	-0.0564057	0.569603	-0.203384	-0.104997	0.589657	-0.198373	-0.0664357
11.44	0.589011	-0.183214	-0.046055	0.571599	-0.195814	-0.0922282	0.591613	-0.192825	-0.0568398
11.45	0.590812	-0.176865	-0.0354665	0.573519	-0.188101	-0.0793571	0.593512	-0.186989	-0.0468872
11.46	0.592547	-0.170295	-0.0246365	0.575361	-0.180302	-0.0664734	0.595351	-0.180832	-0.036534
11.47	0.594217	-0.1635	-0.0135639	0.577124	-0.172476	-0.0536685	0.597127	-0.174325	-0.0257407
11.48	0.595817	-0.156479	-0.00225053	0.57881	-0.164681	-0.0410325	0.598836	-0.167445	-0.0144746
11.49	0.597345	-0.149234	0.00929904	0.580418	-0.156975	-0.0286519	0.600475	-0.160171	-0.00271186
11.5	0.5988	-0.141767	0.0210769	0.58195	-0.149411	-0.0166072	0.602038	-0.152491	0.00956017
11.51	0.60018	-0.134083	0.0330711	0.583407	-0.142038	-0.0049712	0.603523	-0.144401	0.0223414
11.52	0.601481	-0.126192	0.0452653	0.584791	-0.134899	0.00619282	0.604925	-0.135907	0.0356173
11.53	0.602703	-0.118105	0.0576375	0.586106	-0.128031	0.0168319	0.606239	-0.127024	0.0493572
11.54	0.603842	-0.109839	0.070159	0.587353	-0.121465	0.0269044	0.607464	-0.117779	0.0635141
11.55	0.604899	-0.101416	0.082794	0.588536	-0.115222	0.0363799	0.608594	-0.108212	0.0780235
11.56	0.60587	-0.0928627	0.0954985	0.589658	-0.109319	0.0452395	0.609627	-0.0983707	0.0928041
11.57	0.606755	-0.0842129	0.108219	0.590723	-0.103765	0.0534746	0.61056	-0.0883175	0.107758
11.58	0.607554	-0.0755065	0.120893	0.591734	-0.0985614	0.0610865	0.611392	-0.0781238	0.122772
11.59	0.608265	-0.0667902	0.133449	0.592695	-0.0937066	0.0680851	0.612122	-0.0678709	0.13772
11.6	0.60889	-0.0581175	0.145803	0.593609	-0.0891928	0.074487	0.61275	-0.0576482	0.152464
11.61	0.609428	-0.0495486	0.157865	0.59448	-0.085009	0.0803144	0.613276	-0.0475518	0.166857
11.62	0.609881	-0.0411494	0.169536	0.59531	-0.0811417	0.085593	0.613701	-0.037682	0.180748
11.63	0.610251	-0.0329914	0.180708	0.596104	-0.0775758	0.0903506	0.61403	-0.0281419	0.193982
11.64	0.610542	-0.02515	0.191269	0.596863	-0.074296	0.0946154	0.614265	-0.0190344	0.206407
11.65	0.610756	-0.0177036	0.201106	0.59759	-0.0712875	0.0984146	0.614412	-0.0104599	0.217876
11.66	0.610897	-0.0107315	0.210101	0.598289	-0.0685367	0.101773	0.614477	-0.00251403	0.22825
11.67	0.610972	-0.0043128	0.218142	0.598962	-0.066032	0.104712	0.614465	0.00471485	0.237405
11.68	0.610985	0.00147646	0.225121	0.59961	-0.0637645	0.10725	0.614385	0.0111481	0.24523
11.69	0.610944	0.00656471	0.230937	0.600238	-0.0617276	0.1094	0.614245	0.0167186	0.251636
11.7	0.610856	0.0108873	0.235503	0.600845	-0.0599177	0.111171	0.614053	0.0213729	0.256553
11.71	0.610729	0.0143885	0.238745	0.601436	-0.0583334	0.112569	0.61382	0.0250726	0.259937
11.72	0.610571	0.0170235	0.240607	0.602013	-0.0569759	0.113595	0.613555	0.0277955	0.26177
11.73	0.610392	0.0187602	0.241054	0.602577	-0.0558475	0.11425	0.613267	0.029536	0.262056
11.74	0.610199	0.019581	0.240072	0.60313	-0.0549517	0.114531	0.612967	0.0303062	0.260831
11.75	0.610003	0.0194836	0.237671	0.603676	-0.0542921	0.114437	0.612664	0.0301346	0.258152
11.76	0.609812	0.0184821	0.233888	0.604217	-0.0538713	0.113967	0.612367	0.0290666	0.254103
11.77	0.609636	0.0166075	0.228785	0.604754	-0.0536905	0.113124	0.612085	0.0271624	0.248791
11.78	0.609483	0.0139076	0.222446	0.605291	-0.0537483	0.111912	0.611826	0.0244964	0.242343
11.79	0.60936	0.0104462	0.214984	0.60583	-0.0540399	0.110343	0.611597	0.0211548	0.234901
11.8	0.609276	0.00630256	0.206531	0.606372	-0.0545568	0.108434	0.611405	0.0172336	0.226623
11.81	0.609236	0.0015695	0.197239	0.606921	-0.0552858	0.106209	0.611254	0.0128361	0.217677
11.82	0.609246	-0.00364826	0.187278	0.607479	-0.056209	0.103697	0.611149	0.00807067	0.208236
11.83	0.60931	-0.00923654	0.176831	0.608046	-0.0573038	0.100937	0.611093	0.00304759	0.198473
11.84	0.609431	-0.0150743	0.166087	0.608625	-0.0585425	0.097973	0.611089	-0.00212335	0.188562
11.85	0.609611	-0.0210367	0.155243	0.609217	-0.059893	0.0948573	0.611136	-0.00733564	0.178667
11.86	0.609852	-0.026998	0.144493	0.609823	-0.0613196	0.0916461	0.611235	-0.0124885	0.168943
11.87	0.610151	-0.0328347	0.134025	0.610443	-0.062783	0.0884004	0.611385	-0.0174892	0.159532
11.88	0.610507	-0.038429	0.124018	0.611078	-0.0642419	0.0851842	0.611584	-0.0222553	0.150557
11.89	0.610918	-0.0436717	0.114635	0.611728	-0.0656538	0.0820624	0.611829	-0.0267158	0.142123
11.9	0.611379	-0.0484647	0.106022	0.612391	-0.0669765	0.0790991	0.612117	-0.0308133	0.134313
11.91	0.611885	-0.0527241	0.0982993	0.613067	-0.0681687	0.0763558	0.612444	-0.0345043	0.127189
11.92	0.612431	-0.0563821	0.0915629	0.613754	-0.069192	0.0738895	0.612805	-0.0377598	0.120788
11.93	0.613011	-0.0593884	0.0858804	0.61445	-0.0700118	0.0717504	0.613197	-0.0405658	0.115125
11.94	0.613617	-0.0617118	0.0812894	0.615153	-0.0705985	0.0699809	0.613615	-0.0429224	0.110193
11.95	0.614242	-0.0633408	0.0777972	0.615861	-0.0709285	0.0686134	0.614054	-0.0448436	0.105964
11.96	0.614881	-0.0642833	0.0753809	0.61657	-0.0709852	0.0676692	0.61451	-0.0463558	0.102391
11.97	0.615526	-0.0645665	0.0739884	0.617279	-0.0707596	0.0671582	0.614979	-0.0474965	0.0994097
11.98	0.61617	-0.0642353	0.0735406	0.617984	-0.0702506	0.0670774	0.615459	-0.0483129	0.0969423
11.99	0.616808	-0.0633513	0.0739338	0.618683	-0.0694655	0.0674115	0.615945	-0.0488593	0.0949005
12	0.617435	-0.0619902	0.0750436	0.619373	-0.0684194	0.068133	0.616435	-0.049196	0.0931882
12.01	0.618047	-0.0602397	0.0767285	0.62005	-0.0671354	0.0692025	0.616928	-0.0493864	0.0917049
12.02	0.618639	-0.0581962	0.0788349	0.620714	-0.0656437	0.0705702	0.617422	-0.0494953	0.0903492
12.03	0.61921	-0.0559621	0.0812014	0.621362	-0.0639805	0.0721774	0.617918	-0.0495866	0.0890219
12.04	0.619758	-0.0536426	0.0836642	0.621993	-0.0621876	0.0739575	0.618414	-0.0497218	0.0876289
12.05	0.620282	-0.0513423	0.0860617	0.622606	-0.0603106	0.0758388	0.618912	-0.0499575	0.086084
12.06	0.620785	-0.0491622	0.0882397	0.623199	-0.0583976	0.077746	0.619413	-0.0503447	0.0843108
12.07	0.621266	-0.0471967	0.0900556	0.623774	-0.0564983	0.0796029	0.619919	-0.0509268	0.0822451
12.08	0.621729	-0.0455307	0.0913826	0.624329	-0.0546619	0.0813343	0.620432	-0.0517392	0.0798358
12.09	0.622178	-0.0442376	0.0921131	0.624867	-0.052936	0.0828682	0.620955	-0.0528082	0.0770462
12.1	0.622615	-0.0433772	0.0921613	0.625388	-0.0513651	0.0841381	0.621489	-0.054151	0.0738539
12.11	0.623047	-0.0429941	0.0914656	0.625895	-0.0499897	0.0850847	0.622039	-0.0557754	0.0702513
12.12	0.623477	-0.0431172	0.0899891	0.626389	-0.0488448	0.0856571	0.622606	-0.0576801	0.0662444
12.13	0.623911	-0.0437588	0.0877208	0.626872	-0.0479594	0.0858147	0.623193	-0.0598555	0.0618525
12.14	0.624353	-0.0449153	0.0846741	0.627349	-0.0473557	0.0855274	0.623803	-0.0622843	0.0571064
12.15	0.62481	-0.0465677	0.0808863	0.62782	-0.0470488	0.0847766	0.624439	-0.0649421	0.0520468
12.16	0.625286	-0.0486825	0.076416	0.62829	-0.0470464	0.0835547	0.625103	-0.0677995	0.0467229
12.17	0.625785	-0.0512139	0.0713406	0.628762	-0.0473496	0.0818652	0.625796	-0.0708222	0.0411899
12.18	0.626311	-0.0541054	0.0657529	0.629238	-0.0479524	0.0797217	0.626519	-0.0739732	0.035507
12.19	0.626868	-0.0572924	0.0597575	0.629722	-0.048843	0.0771468	0.627275	-0.0772137	0.0297356
12.2	0.627458	-0.0607046	0.0534665	0.630216	-0.0500045	0.0741711	0.628064	-0.0805046	0.023937
12.21	0.628083	-0.0642686	0.0469959	0.630722	-0.0514156	0.0708311	0.628885	-0.0838074	0.0181708
12.22	0.628743	-0.0679106	0.0404606	0.631245	-0.0530523	0.0671676	0.629739	-0.0870858	0.0124929
12.23	0.629441	-0.0715591	0.0339714	0.631784	-0.0548885	0.0632238	0.630626	-0.0903062	0.00695425
12.24	0.630174	-0.0751476	0.0276305	0.632343	-0.0568976	0.0590438	0.631545	-0.0934386	0.00159976
12.25	0.630943	-0.078616	0.0215286	0.632922	-0.0590533	0.0546701	0.632495	-0.0964576	-0.00353279
12.26	0.631746	-0.0819135	0.0157418	0.633524	-0.0613314	0.0501425	0.633474	-0.0993422	-0.0084132
12.27	0.63258	-0.0849991	0.01033	0.634149	-0.0637099	0.0454961	0.634481	-0.102077	-0.0130192
12.28	0.633445	-0.0878437	0.00533474	0.634798	-0.0661704	0.0407608	0.635514	-0.10465	-0.0173364
12.29	0.634336	-0.0904299	0.000778862	0.635472	-0.0686987	0.0359596	0.636573	-0.107056	-0.021358
12.3	0.635252	-0.0927524	-0.00333377	0.636172	-0.0712849	0.0311088	0.637655	-0.109293	-0.0250845
12.31	0.63619	-0.0948182	-0.00701759	0.636898	-0.0739237	0.0262171	0.638758	-0.111365	-0.0285229
12.32	0.637148	-0.0966452	-0.0103041	0.637651	-0.0766145	0.0212864	0.639881	-0.113277	-0.0316856
12.33	0.638122	-0.0982613	-0.0132397	0.63843	-0.0793609	0.016312	0.641023	-0.11504	-0.0345902
12.34	0.639112	-0.0997032	-0.015884	0.639238	-0.0821703	0.0112836	0.642182	-0.116666	-0.037258
12.35	0.640116	-0.101014	-0.018306	0.640074	-0.0850528	0.00618626	0.643356	-0.118169	-0.0397131
12.36	0.641132	-0.102243	-0.0205821	0.640939	-0.088021	0.00100214	0.644544	-0.119566	-0.0419817
12.37	0.64216	-0.103442	-0.0227919	0.641834	-0.0910885	-0.00428825	0.645747	-0.120873	-0.0440913
12.38	0.6432	-0.104661	-0.0250156	0.642761	-0.0942688	-0.00970426	0.646961	-0.122107	-0.0460697
12.39	0.644253	-0.105951	-0.0273304	0.64372	-0.0975746	-0.0152634	0.648188	-0.123286	-0.0479447
12.4	0.64532	-0.107361	-0.0298077	0.644713	-0.101016	-0.0209798	0.649427	-0.124427	-0.0497435
12.41	0.646401	-0.108933	-0.0325103	0.645741	-0.104601	-0.0268627	0.650677	-0.125547	-0.0514926
12.42	0.647499	-0.110701	-0.0354904	0.646805	-0.108333	-0.0329151	0.651937	-0.126662	-0.0532175
12.43	0.648616	-0.112694	-0.0387876	0.647908	-0.112211	-0.0391328	0.65321	-0.127789	-0.0549427
12.44	0.649753	-0.114932	-0.042428	0.64905	-0.116227	-0.0455036	0.654493	-0.128943	-0.0566918
12.45	0.650915	-0.117423	-0.0464232	0.650232	-0.12037	-0.0520072	0.655788	-0.130139	-0.0584878
12.46	0.652102	-0.12017	-0.0507706	0.651457	-0.124624	-0.0586151	0.657096	-0.131392	-0.0603532
12.47	0.653319	-0.123164	-0.0554541	0.652725	-0.128964	-0.0652908	0.658416	-0.132718	-0.0623104
12.48	0.654566	-0.126389	-0.060445	0.654036	-0.133364	-0.0719912	0.65975	-0.134132	-0.0643817
12.49	0.655847	-0.129821	-0.0657036	0.655392	-0.137792	-0.0786672	0.661099	-0.135649	-0.06659
12.5	0.657163	-0.133431	-0.0711816	0.656792	-0.142215	-0.0852656	0.662464	-0.137287	-0.0689585
12.51	0.658516	-0.137185	-0.0767216	0.658236	-0.146594	-0.0916278	0.663845	-0.13906	-0.0714082
12.52	0.659907	-0.141046	-0.0823677	0.659723	-0.150894	-0.0978002	0.665245	-0.140988	-0.0740659
12.53	0.661337	-0.144976	-0.0880605	0.661253	-0.155077	-0.103728	0.666665	-0.143086	-0.0769558
12.54	0.662806	-0.148939	-0.093742	0.662824	-0.159108	-0.10936	0.668107	-0.145374	-0.0801019
12.55	0.664316	-0.152899	-0.0993589	0.664435	-0.162958	-0.114651	0.669573	-0.147866	-0.0835279
12.56	0.665864	-0.156826	-0.104864	0.666083	-0.166599	-0.119563	0.671065	-0.150581	-0.0872558
12.57	0.667452	-0.160695	-0.110221	0.667766	-0.17001	-0.124069	0.672585	-0.153534	-0.0913059
12.58	0.669078	-0.164488	-0.1154	0.669482	-0.173179	-0.128149	0.674136	-0.156739	-0.0956955
12.59	0.670741	-0.168193	-0.120388	0.671228	-0.176098	-0.131799	0.675721	-0.160206	-0.100438
12.6	0.672441	-0.171808	-0.12518	0.673003	-0.17877	-0.135026	0.677341	-0.163944	-0.105543
12.61	0.674177	-0.175337	-0.129786	0.674803	-0.181204	-0.137849	0.679	-0.16796	-0.111014
12.62	0.675947	-0.178794	-0.134226	0.676626	-0.18342	-0.140299	0.680701	-0.172253	-0.116849
12.63	0.677752	-0.182199	-0.138534	0.67847	-0.185443	-0.14242	0.682446	-0.17682	-0.123037
12.64	0.679591	-0.185578	-0.14275	0.680334	-0.187306	-0.144265	0.684238	-0.181653	-0.129562
12.65	0.681464	-0.188963	-0.146923	0.682216	-0.189048	-0.145895	0.68608	-0.186739	-0.136398
12.66	0.68337	-0.19239	-0.151108	0.684115	-0.190712	-0.14738	0.687974	-0.192058	-0.143514
12.67	0.685311	-0.195895	-0.15536	0.68603	-0.192344	-0.148791	0.689922	-0.197585	-0.150867
12.68	0.687288	-0.199517	-0.159736	0.687961	-0.193992	-0.150201	0.691926	-0.203292	-0.15841
12.69	0.689302	-0.20329	-0.164289	0.68991	-0.195702	-0.151681	0.693988	-0.209144	-0.166086
12.7	0.691354	-0.207246	-0.169063	0.691875	-0.19752	-0.153299	0.696109	-0.215101	-0.173834
12.71	0.693447	-0.21141	-0.174097	0.69386	-0.199485	-0.155115	0.69829	-0.221121	-0.181586
12.72	0.695583	-0.215803	-0.179415	0.695866	-0.201632	-0.157179	0.700531	-0.227157	-0.18927
12.73	0.697764	-0.220433	-0.185028	0.697893	-0.203986	-0.159527	0.702833	-0.233161	-0.196813
12.74	0.699992	-0.225299	-0.190934	0.699946	-0.206565	-0.162183	0.705194	-0.239084	-0.204139
12.75	0.702271	-0.230392	-0.19711	0.702025	-0.209375	-0.165153	0.707614	-0.244877	-0.211174
12.76	0.704601	-0.235687	-0.203518	0.704134	-0.212412	-0.168428	0.710091	-0.25049	-0.217845
12.77	0.706985	-0.241152	-0.210103	0.706274	-0.215661	-0.17198	0.712623	-0.255877	-0.224083
12.78	0.709424	-0.246739	-0.216793	0.708448	-0.219094	-0.175763	0.715207	-0.260995	-0.229827
12.79	0.71192	-0.252394	-0.223499	0.710656	-0.222671	-0.179716	0.717841	-0.265804	-0.235019
12.8	0.714472	-0.258049	-0.23012	0.712901	-0.226345	-0.18376	0.720522	-0.27027	-0.239613
12.81	0.71708	-0.263633	-0.236543	0.715183	-0.230057	-0.187805	0.723245	-0.274365	-0.243569
12.82	0.719744	-0.269064	-0.242646	0.717502	-0.233739	-0.19175	0.726008	-0.278066	-0.24686
12.83	0.72246	-0.274258	-0.248304	0.719857	-0.237321	-0.195482	0.728805	-0.281359	-0.249468
12.84	0.725228	-0.279129	-0.253387	0.722248	-0.240725	-0.198888	0.731633	-0.284235	-0.251387
12.85	0.728041	-0.283592	-0.257771	0.724671	-0.243874	-0.201851	0.734488	-0.286692	-0.252622
12.86	0.730898	-0.287564	-0.261333	0.727124	-0.24669	-0.204256	0.737365	-0.288738	-0.253188
12.87	0.733791	-0.290968	-0.263965	0.729603	-0.2491	-0.205996	0.740261	-0.290383	-0.253111
12.88	0.736715	-0.293733	-0.265567	0.732104	-0.251036	-0.206972	0.743172	-0.291648	-0.252425
12.89	0.739663	-0.295801	-0.266059	0.734622	-0.252436	-0.2071	0.746093	-0.292554	-0.251172
12.9	0.742628	-0.297125	-0.265379	0.737151	-0.253253	-0.206311	0.749021	-0.293131	-0.2494
12.91	0.745602	-0.297669	-0.263488	0.739684	-0.253447	-0.204557	0.751954	-0.293411	-0.247164
12.92	0.748578	-0.297417	-0.260367	0.742217	-0.252994	-0.20181	0.754889	-0.293426	-0.244519
12.93	0.751548	-0.296365	-0.256027	0.744742	-0.251885	-0.198067	0.757822	-0.293214	-0.241526
12.94	0.754503	-0.294528	-0.2505	0.747252	-0.250127	-0.193346	0.760752	-0.292808	-0.238241
12.95	0.757436	-0.291936	-0.243846	0.749742	-0.247742	-0.187691	0.763677	-0.292246	-0.234721
12.96	0.760339	-0.288636	-0.236148	0.752205	-0.244767	-0.181172	0.766596	-0.291559	-0.23102
12.97	0.763206	-0.28469	-0.227514	0.754636	-0.241257	-0.173879	0.769508	-0.290779	-0.227186
12.98	0.766031	-0.280176	-0.21807	0.757028	-0.237278	-0.165923	0.772411	-0.289932	-0.223263
12.99	0.768808	-0.275183	-0.207962	0.75938	-0.232912	-0.157434	0.775306	-0.289043	-0.219287
13	0.771533	-0.269811	-0.197351	0.761686	-0.228248	-0.148557	0.778192	-0.288129	-0.215288
13.01	0.774203	-0.264169	-0.18641	0.763944	-0.223385	-0.139449	0.781069	-0.287206	-0.211289
13.02	0.776816	-0.258372	-0.175318	0.766153	-0.21843	-0.130273	0.783936	-0.286283	-0.207303
13.03	0.77937	-0.252537	-0.164257	0.768312	-0.21349	-0.121197	0.786794	-0.285364	-0.203338
13.04	0.781867	-0.246784	-0.153411	0.770423	-0.208675	-0.112388	0.789643	-0.28445	-0.199395
13.05	0.784306	-0.241227	-0.142955	0.772486	-0.204091	-0.104008	0.792483	-0.283538	-0.195469
13.06	0.786692	-0.235979	-0.133058	0.774506	-0.19984	-0.0962071	0.795314	-0.282621	-0.19155
13.07	0.789027	-0.231144	-0.123872	0.776484	-0.196015	-0.0891247	0.798135	-0.28169	-0.187624
13.08	0.791316	-0.226815	-0.115536	0.778427	-0.1927	-0.0828817	0.800947	-0.280734	-0.183673
13.09	0.793565	-0.223073	-0.108166	0.78034	-0.189967	-0.0775793	0.803749	-0.279741	-0.179679
13.1	0.79578	-0.219987	-0.101858	0.782229	-0.187871	-0.0732954	0.806542	-0.278697	-0.175624
13.11	0.797967	-0.217609	-0.0966798	0.7841	-0.186454	-0.0700838	0.809323	-0.277591	-0.17149
13.12	0.800134	-0.215974	-0.0926759	0.78596	-0.185742	-0.0679719	0.812093	-0.276412	-0.167261
13.13	0.802289	-0.215099	-0.0898623	0.787817	-0.185741	-0.0669609	0.814851	-0.275151	-0.162924
13.14	0.804439	-0.214987	-0.0882279	0.789677	-0.186443	-0.0670257	0.817596	-0.273802	-0.158471
13.15	0.806591	-0.215618	-0.0877347	0.791547	-0.187823	-0.0681159	0.820326	-0.27236	-0.153897
13.16	0.808753	-0.21696	-0.0883189	0.793435	-0.189838	-0.0701575	0.823042	-0.270824	-0.149203
13.17	0.810932	-0.218962	-0.0898928	0.795346	-0.192432	-0.0730553	0.825742	-0.269198	-0.144394
13.18	0.813134	-0.22156	-0.0923468	0.797285	-0.195537	-0.0766953	0.828426	-0.267487	-0.139479
13.19	0.815365	-0.224674	-0.0955525	0.799258	-0.199074	-0.0809485	0.831092	-0.2657	-0.134474
13.2	0.817629	-0.228216	-0.0993655	0.801268	-0.202956	-0.0856739	0.833739	-0.263847	-0.129396
13.21	0.81993	-0.232089	-0.103629	0.803318	-0.207088	-0.0907233	0.836368	-0.261943	-0.124268
13.22	0.822271	-0.236188	-0.108179	0.80541	-0.211374	-0.0959444	0.838978	-0.260002	-0.119114
13.23	0.824654	-0.240403	-0.112845	0.807545	-0.215716	-0.101186	0.841568	-0.258041	-0.113959
13.24	0.827079	-0.244627	-0.117458	0.809724	-0.220018	-0.106299	0.844138	-0.256077	-0.108828
13.25	0.829546	-0.24875	-0.121852	0.811945	-0.22419	-0.111147	0.846689	-0.254126	-0.103748
13.26	0.832053	-0.252667	-0.125867	0.814207	-0.228146	-0.115599	0.849221	-0.252204	-0.0987425
13.27	0.834598	-0.256279	-0.129356	0.816507	-0.231811	-0.119544	0.851733	-0.250324	-0.0938317
13.28	0.837177	-0.259498	-0.132186	0.818842	-0.235117	-0.122886	0.854227	-0.248499	-0.0890338
13.29	0.839786	-0.262243	-0.134241	0.821207	-0.238012	-0.125546	0.856703	-0.246739	-0.0843626
13.3	0.84242	-0.264447	-0.135425	0.8236	-0.240454	-0.127468	0.859162	-0.24505	-0.0798274
13.31	0.845073	-0.266056	-0.135666	0.826015	-0.242416	-0.128617	0.861604	-0.243436	-0.0754326
13.32	0.847739	-0.267032	-0.134913	0.828447	-0.243883	-0.128979	0.864031	-0.241897	-0.071178
13.33	0.850411	-0.267353	-0.13314	0.830891	-0.244855	-0.128561	0.866442	-0.240431	-0.0670586
13.34	0.853084	-0.26701	-0.130348	0.833342	-0.245344	-0.127389	0.86884	-0.239032	-0.0630653
13.35	0.855749	-0.266013	-0.12656	0.835796	-0.245376	-0.125508	0.871223	-0.237693	-0.0591849
13.36	0.858402	-0.264388	-0.121825	0.838248	-0.244986	-0.122981	0.873593	-0.236405	-0.0554017
13.37	0.861035	-0.262173	-0.116213	0.840694	-0.244218	-0.119884	0.875951	-0.235154	-0.0516974
13.38	0.863643	-0.259422	-0.109814	0.843131	-0.243127	-0.116302	0.878296	-0.233931	-0.0480529
13.39	0.866221	-0.2562	-0.102737	0.845555	-0.241771	-0.112331	0.88063	-0.232721	-0.0444486
13.4	0.868765	-0.252585	-0.0951068	0.847965	-0.240213	-0.108073	0.882951	-0.231514	-0.0408661
13.41	0.871272	-0.24866	-0.0870588	0.850359	-0.238518	-0.103629	0.88526	-0.230297	-0.0372888
13.42	0.873738	-0.244517	-0.0787373	0.852735	-0.236751	-0.0991017	0.887556	-0.229063	-0.0337028
13.43	0.876162	-0.240251	-0.0702915	0.855094	-0.234977	-0.0945893	0.889841	-0.227804	-0.0300979
13.44	0.878542	-0.235959	-0.0618712	0.857435	-0.233254	-0.0901835	0.892112	-0.226516	-0.026468
13.45	0.880881	-0.231736	-0.0536235	0.859759	-0.231638	-0.0859671	0.894371	-0.225198	-0.0228118
13.46	0.883178	-0.227675	-0.0456888	0.862068	-0.230176	-0.0820121	0.896616	-0.223852	-0.019133
13.47	0.885435	-0.223863	-0.0381972	0.864363	-0.228909	-0.078378	0.898847	-0.222483	-0.0154401
13.48	0.887656	-0.220378	-0.0312653	0.866647	-0.227868	-0.0751102	0.901065	-0.2211	-0.0117463
13.49	0.889844	-0.217289	-0.0249929	0.868921	-0.227077	-0.07224	0.903269	-0.219714	-0.00806933
13.5	0.892003	-0.214653	-0.0194611	0.871189	-0.226548	-0.0697832	0.905459	-0.218339	-0.00443032
13.51	0.894138	-0.212512	-0.0147296	0.873453	-0.226284	-0.0677412	0.907636	-0.216991	-0.000853309
13.52	0.896255	-0.210898	-0.0108353	0.875715	-0.226281	-0.0661009	0.909799	-0.215686	0.00263585
13.53	0.898358	-0.209822	-0.00779171	0.877979	-0.226522	-0.0648357	0.91195	-0.214443	0.00601058
13.54	0.900453	-0.209285	-0.00558838	0.880246	-0.226986	-0.063907	0.914088	-0.213279	0.00924477
13.55	0.902545	-0.209269	-0.00419133	0.882519	-0.227642	-0.0632655	0.916215	-0.212211	0.012314
13.56	0.904639	-0.209743	-0.003544	0.884799	-0.228454	-0.062853	0.918332	-0.211255	0.0151965
13.57	0.906741	-0.210661	-0.00356888	0.887088	-0.229381	-0.0626048	0.920441	-0.210422	0.0178747
13.58	0.908854	-0.211964	-0.00416971	0.889387	-0.23038	-0.0624511	0.922541	-0.209723	0.0203357
13.59	0.910981	-0.213583	-0.00523417	0.891696	-0.231404	-0.0623198	0.924635	-0.209163	0.0225724
13.6	0.913126	-0.21544	-0.00663706	0.894015	-0.232405	-0.0621386	0.926725	-0.208745	0.0245842
13.61	0.91529	-0.217449	-0.0082439	0.896343	-0.233337	-0.0618365	0.928811	-0.208466	0.0263768
13.62	0.917475	-0.21952	-0.00991473	0.898681	-0.234156	-0.0613467	0.930894	-0.208318	0.0279632
13.63	0.91968	-0.221561	-0.0115082	0.901026	-0.234821	-0.0606079	0.932977	-0.208291	0.0293628
13.64	0.921906	-0.223481	-0.0128857	0.903377	-0.235294	-0.0595658	0.93506	-0.208369	0.0306017
13.65	0.924149	-0.225194	-0.0139153	0.905731	-0.235545	-0.0581752	0.937145	-0.208532	0.0317114
13.66	0.926408	-0.226618	-0.0144759	0.908086	-0.235547	-0.0564003	0.939231	-0.208757	0.0327285
13.67	0.92868	-0.22768	-0.0144607	0.910441	-0.235281	-0.0542162	0.94132	-0.209019	0.0336933
13.68	0.93096	-0.228318	-0.0137804	0.912791	-0.234737	-0.051609	0.943411	-0.209289	0.0346487
13.69	0.933245	-0.228483	-0.0123662	0.915134	-0.233909	-0.0485766	0.945505	-0.20954	0.0356391
13.7	0.935528	-0.22814	-0.0101718	0.917468	-0.232801	-0.045128	0.947602	-0.209741	0.0367085
13.71	0.937806	-0.227269	-0.00717508	0.919789	-0.231424	-0.0412835	0.9497	-0.209865	0.0378995
13.72	0.940072	-0.225868	-0.00337902	0.922095	-0.229793	-0.037074	0.951798	-0.209885	0.0392517
13.73	0.942321	-0.223948	0.00118839	0.924384	-0.227935	-0.0325398	0.953897	-0.209776	0.0408007
13.74	0.944549	-0.22154	0.00647464	0.926653	-0.225878	-0.0277301	0.955993	-0.209518	0.0425766
13.75	0.94675	-0.218687	0.0124041	0.928901	-0.223657	-0.0227016	0.958086	-0.209094	0.0446033
13.76	0.948921	-0.215449	0.0188801	0.931126	-0.221312	-0.0175166	0.960174	-0.208491	0.0468975
13.77	0.951058	-0.211896	0.0257878	0.933327	-0.218884	-0.0122422	0.962255	-0.207701	0.0494686
13.78	0.953158	-0.20811	0.0329974	0.935503	-0.21642	-0.00694835	0.964327	-0.20672	0.0523183
13.79	0.955219	-0.20418	0.0403681	0.937655	-0.213964	-0.00170603	0.966389	-0.205552	0.0554406
13.8	0.957241	-0.200202	0.0477522	0.939782	-0.211563	0.00341412	0.968438	-0.204203	0.058822
13.81	0.959223	-0.196273	0.0549998	0.941886	-0.209263	0.00834362	0.970472	-0.202684	0.0624428
13.82	0.961167	-0.192491	0.0619633	0.943968	-0.207106	0.0130177	0.972491	-0.201011	0.0662769
13.83	0.963074	-0.188947	0.0685021	0.946029	-0.205134	0.0173767	0.974492	-0.199201	0.070294
13.84	0.964947	-0.18573	0.0744869	0.948071	-0.203382	0.0213677	0.976474	-0.197275	0.0744599
13.85	0.966789	-0.182917	0.0798041	0.950097	-0.201883	0.0249454	0.978437	-0.195257	0.0787385
13.86	0.968606	-0.180573	0.0843592	0.95211	-0.200662	0.0280736	0.980379	-0.193168	0.0830928
13.87	0.970402	-0.17875	0.0880803	0.954111	-0.19974	0.0307256	0.9823	-0.191034	0.0874864
13.88	0.972183	-0.177485	0.0909206	0.956105	-0.19913	0.0328853	0.984199	-0.188874	0.0918852
13.89	0.973954	-0.176795	0.0928599	0.958095	-0.198839	0.0345472	0.986077	-0.186709	0.0962584
13.9	0.975721	-0.176682	0.0939055	0.960083	-0.198867	0.0357171	0.987933	-0.184556	0.10058
13.91	0.977489	-0.177129	0.0940929	0.962073	-0.199205	0.0364114	0.989768	-0.18243	0.104828
13.92	0.979265	-0.1781	0.0934843	0.964068	-0.19984	0.0366575	0.991582	-0.180339	0.108988
13.93	0.981053	-0.179544	0.0921672	0.96607	-0.20075	0.0364929	0.993375	-0.17829	0.113053
13.94	0.982857	-0.181393	0.0902523	0.968083	-0.201906	0.0359645	0.995147	-0.176285	0.11702
13.95	0.984681	-0.183566	0.0878697	0.970109	-0.203276	0.0351276	0.9969	-0.174319	0.120894
13.96	0.986529	-0.185971	0.0851656	0.972149	-0.20482	0.0340452	0.998634	-0.172387	0.124687
13.97	0.988401	-0.188508	0.0822975	0.974206	-0.206495	0.0327859	1.00035	-0.170478	0.128416
13.98	0.990299	-0.191069	0.0794299	0.976279	-0.208254	0.0314232	1.00204	-0.168578	0.1321
13.99	0.992222	-0.193548	0.0767287	0.978371	-0.210049	0.0300335	1.00372	-0.166672	0.135766
14	0.994169	-0.195837	0.0743565	0.98048	-0.211828	0.0286947	1.00538	-0.164741	0.139439
14.01	0.996138	-0.197834	0.0728779	0.982607	-0.213542	0.0278947	1.00701	-0.162769	0.143556
14.02	0.998124	-0.199442	0.0720236	0.98475	-0.215139	0.0272988	1.00863	-0.160737	0.147735
14.03	1.00012	-0.200579	0.0719168	0.986909	-0.216573	0.0269789	1.01023	-0.158628	0.152
14.04	1.00213	-0.201172	0.0726594	0.989081	-0.217796	0.027002	1.0118	-0.156429	0.15637
14.05	1.00415	-0.201166	0.0743285	0.991264	-0.218769	0.0274282	1.01336	-0.154129	0.160862
14.06	1.00615	-0.200521	0.0769742	0.993455	-0.219454	0.0283097	1.01489	-0.151719	0.165486
14.07	1.00815	-0.199219	0.080618	0.995652	-0.21982	0.0296899	1.01639	-0.149198	0.170245
14.08	1.01014	-0.197256	0.0852518	0.99785	-0.219842	0.031602	1.01787	-0.146565	0.175134
14.09	1.0121	-0.194651	0.0908388	1.00005	-0.219502	0.0340687	1.01932	-0.143829	0.180141
14.1	1.01403	-0.19144	0.0973144	1.00224	-0.218789	0.0371016	1.02074	-0.141	0.185248
14.11	1.01592	-0.187674	0.104588	1.00442	-0.217699	0.0407013	1.02214	-0.138096	0.190427
14.12	1.01778	-0.183424	0.112547	1.00659	-0.216234	0.0448572	1.02351	-0.135137	0.195645
14.13	1.01959	-0.178769	0.121059	1.00874	-0.214405	0.0495482	1.02484	-0.132148	0.200863
14.14	1.02135	-0.173801	0.129977	1.01088	-0.212228	0.0547434	1.02615	-0.129158	0.206037
14.15	1.02307	-0.168621	0.139145	1.01299	-0.209726	0.0604028	1.02743	-0.126197	0.211121
14.16	1.02473	-0.163332	0.148399	1.01507	-0.206927	0.0664786	1.02867	-0.123297	0.216066
14.17	1.02633	-0.158039	0.15758	1.01713	-0.203863	0.0729164	1.02989	-0.120489	0.220824
14.18	1.02789	-0.152842	0.166529	1.01915	-0.200571	0.0796569	1.03108	-0.117806	0.22535
14.19	1.02939	-0.14784	0.175101	1.02114	-0.197088	0.0866373	1.03225	-0.115275	0.229599
14.2	1.03084	-0.14312	0.183165	1.02309	-0.193456	0.0937932	1.03339	-0.112924	0.233536
14.21	1.03225	-0.138758	0.190607	1.025	-0.189716	0.10106	1.03451	-0.110774	0.237127
14.22	1.03362	-0.134818	0.197337	1.02688	-0.185906	0.108374	1.03561	-0.108843	0.240351
14.23	1.03495	-0.131346	0.203288	1.02872	-0.182066	0.115677	1.03668	-0.107143	0.243193
14.24	1.03625	-0.128374	0.208422	1.03052	-0.178231	0.122912	1.03775	-0.105678	0.245647
14.25	1.03752	-0.125915	0.212725	1.03229	-0.174434	0.13003	1.0388	-0.104449	0.247717
14.26	1.03877	-0.123964	0.216212	1.03401	-0.170704	0.136988	1.03984	-0.103449	0.249419
14.27	1.04	-0.122501	0.218921	1.0357	-0.167063	0.143751	1.04087	-0.102665	0.250774
14.28	1.04122	-0.121489	0.220919	1.03735	-0.163531	0.150292	1.04189	-0.102079	0.251815
14.29	1.04243	-0.120878	0.222287	1.03897	-0.16012	0.156592	1.04291	-0.101666	0.252581
14.3	1.04364	-0.120604	0.22313	1.04056	-0.156839	0.162642	1.04393	-0.101399	0.253117
14.31	1.04484	-0.120595	0.223562	1.04211	-0.15369	0.168439	1.04494	-0.101247	0.253473
14.32	1.04605	-0.120774	0.223707	1.04363	-0.150671	0.17399	1.04595	-0.101177	0.253702
14.33	1.04726	-0.121059	0.223693	1.04512	-0.147774	0.179305	1.04696	-0.101155	0.253857
14.34	1.04847	-0.121366	0.223649	1.04659	-0.144991	0.184403	1.04797	-0.101147	0.253989
14.35	1.04969	-0.121619	0.223694	1.04802	-0.142306	0.189307	1.04898	-0.101122	0.254148
14.36	1.0509	-0.121742	0.223941	1.04943	-0.139705	0.194042	1.05	-0.10105	0.254378
14.37	1.05212	-0.121671	0.224485	1.05082	-0.13717	0.198635	1.05101	-0.100907	0.254715
14.38	1.05334	-0.121354	0.225407	1.05218	-0.134684	0.203115	1.05201	-0.100674	0.255188
14.39	1.05455	-0.120749	0.226764	1.05351	-0.13223	0.207507	1.05302	-0.100336	0.255819
14.4	1.05575	-0.119831	0.228592	1.05482	-0.129793	0.211837	1.05402	-0.0998858	0.256616
14.41	1.05694	-0.118589	0.230901	1.05611	-0.127358	0.216125	1.05502	-0.099323	0.257578
14.42	1.05812	-0.117028	0.233679	1.05737	-0.124915	0.220388	1.05601	-0.0986535	0.258695
14.43	1.05928	-0.115169	0.23689	1.0586	-0.122458	0.224635	1.05699	-0.0978904	0.259945
14.44	1.06042	-0.113047	0.240475	1.05982	-0.119982	0.228873	1.05796	-0.0970528	0.261297
14.45	1.06154	-0.110709	0.244357	1.061	-0.117488	0.233101	1.05893	-0.0961651	0.262713
14.46	1.06264	-0.108214	0.248443	1.06217	-0.114981	0.23731	1.05989	-0.0952568	0.264147
14.47	1.0637	-0.105632	0.252624	1.0633	-0.112469	0.241487	1.06083	-0.0943604	0.265548
14.48	1.06475	-0.103036	0.256788	1.06441	-0.109966	0.245614	1.06177	-0.0935107	0.266865
14.49	1.06577	-0.100502	0.260816	1.0655	-0.107485	0.249667	1.0627	-0.0927432	0.268042
14.5	1.06676	-0.0981073	0.264591	1.06656	-0.105045	0.25362	1.06363	-0.0920927	0.269028
14.51	1.06773	-0.0959262	0.268003	1.0676	-0.102666	0.257441	1.06455	-0.0915915	0.269776
14.52	1.06868	-0.0940259	0.270951	1.06862	-0.100369	0.261101	1.06546	-0.0912681	0.270244
14.53	1.06961	-0.0924649	0.273351	1.06961	-0.0981742	0.264568	1.06637	-0.0911458	0.270399
14.54	1.07053	-0.0912903	0.275135	1.07058	-0.0961023	0.267814	1.06728	-0.0912417	0.270218
14.55	1.07144	-0.0905356	0.276258	1.07153	-0.0941715	0.270812	1.0682	-0.0915648	0.269691
14.56	1.07234	-0.0902189	0.276699	1.07247	-0.0923975	0.27354	1.06912	-0.0921162	0.268819
14.57	1.07324	-0.0903425	0.276461	1.07338	-0.0907928	0.275982	1.07004	-0.0928878	0.267619
14.58	1.07415	-0.0908918	0.275574	1.07428	-0.0893657	0.278127	1.07097	-0.0938624	0.26612
14.59	1.07506	-0.0918356	0.274091	1.07517	-0.0881198	0.279973	1.07192	-0.0950134	0.264366
14.6	1.07599	-0.0931272	0.27209	1.07604	-0.0870539	0.281524	1.07287	-0.0963054	0.262413
14.61	1.07692	-0.0947053	0.269671	1.07691	-0.0861614	0.282793	1.07384	-0.097695	0.260332
14.62	1.07788	-0.096496	0.26695	1.07777	-0.0854305	0.283801	1.07483	-0.0991311	0.2582
14.63	1.07885	-0.0984155	0.26406	1.07862	-0.0848445	0.284576	1.07583	-0.100557	0.256107
14.64	1.07985	-0.100372	0.261143	1.07947	-0.0843818	0.285154	1.07684	-0.101911	0.254145
14.65	1.08086	-0.10227	0.258347	1.08031	-0.0840167	0.285575	1.07786	-0.103129	0.252413
14.66	1.08189	-0.104011	0.255819	1.08115	-0.0837202	0.285885	1.0789	-0.104144	0.25101
14.67	1.08294	-0.105501	0.253703	1.08198	-0.0834603	0.286135	1.07995	-0.104892	0.250032
14.68	1.084	-0.106648	0.252135	1.08281	-0.0832037	0.286375	1.081	-0.10531	0.24957
14.69	1.08507	-0.10737	0.251234	1.08364	-0.0829159	0.28666	1.08205	-0.10534	0.249709
14.7	1.08615	-0.107596	0.251105	1.08447	-0.082563	0.28704	1.0831	-0.104929	0.250522
14.71	1.08722	-0.107266	0.25183	1.0853	-0.0821123	0.287564	1.08415	-0.104034	0.252071
14.72	1.08829	-0.106338	0.253466	1.08611	-0.0815334	0.288278	1.08518	-0.10262	0.254402
14.73	1.08935	-0.104783	0.256046	1.08693	-0.080799	0.289221	1.0862	-0.10066	0.257545
14.74	1.09038	-0.102592	0.259577	1.08773	-0.0798857	0.290426	1.08719	-0.0981416	0.261513
14.75	1.0914	-0.099772	0.264037	1.08852	-0.0787748	0.29192	1.08816	-0.0950628	0.266301
14.76	1.09238	-0.0963462	0.269381	1.0893	-0.0774526	0.29372	1.08909	-0.0914334	0.271884
14.77	1.09332	-0.0923549	0.275538	1.09007	-0.0759107	0.295836	1.08999	-0.0872752	0.27822
14.78	1.09422	-0.087852	0.282416	1.09082	-0.0741461	0.298269	1.09083	-0.0826216	0.285251
14.79	1.09508	-0.0829041	0.289906	1.09155	-0.0721613	0.301012	1.09164	-0.0775164	0.292902
14.8	1.09588	-0.0775876	0.297884	1.09226	-0.0699637	0.304051	1.09238	-0.0720131	0.301083
14.81	1.09663	-0.0719858	0.306217	1.09295	-0.0675654	0.307362	1.09307	-0.0661736	0.309694
14.82	1.09732	-0.0661866	0.314766	1.09361	-0.0649825	0.31092	1.09371	-0.0600662	0.318625
14.83	1.09795	-0.0602789	0.323392	1.09425	-0.0622342	0.314691	1.09428	-0.0537647	0.32776
14.84	1.09852	-0.0543499	0.331959	1.09486	-0.0593424	0.318639	1.09478	-0.0473455	0.336977
14.85	1.09904	-0.048482	0.340341	1.09544	-0.0563304	0.322727	1.09522	-0.0408867	0.346157
14.86	1.09949	-0.0427505	0.348424	1.09598	-0.0532223	0.326915	1.0956	-0.0344655	0.355179
14.87	1.09989	-0.037221	0.35611	1.0965	-0.0500418	0.331167	1.09591	-0.0281566	0.36393
14.88	1.10024	-0.0319478	0.363318	1.09698	-0.0468116	0.335445	1.09616	-0.0220304	0.372305
14.89	1.10053	-0.0269722	0.36999	1.09744	-0.0435528	0.339718	1.09635	-0.0161517	0.380206
14.9	1.10078	-0.022322	0.376087	1.09786	-0.0402838	0.343956	1.09649	-0.0105776	0.387551
14.91	1.10098	-0.0180111	0.381593	1.09824	-0.0370203	0.348135	1.09657	-0.00535713	0.394269
14.92	1.10114	-0.0140396	0.386513	1.0986	-0.0337749	0.352237	1.09659	-0.000529928	0.400304
14.93	1.10126	-0.0103949	0.390871	1.09892	-0.0305569	0.356246	1.09658	0.00387424	0.405617
14.94	1.10135	-0.00705301	0.394711	1.09921	-0.0273724	0.360155	1.09652	0.00783577	0.410185
14.95	1.1014	-0.0039801	0.398087	1.09946	-0.0242245	0.363959	1.09642	0.0113451	0.414
14.96	1.10143	-0.00113497	0.401067	1.09969	-0.0211139	0.367657	1.09629	0.0144027	0.417069
14.97	1.10143	0.00152864	0.403726	1.09989	-0.0180393	0.371252	1.09613	0.0170181	0.419415
14.98	1.1014	0.00405942	0.40614	1.10005	-0.0149982	0.374749	1.09595	0.0192092	0.42107
14.99	1.10135	0.00650577	0.408386	1.10019	-0.0119876	0.378152	1.09575	0.0210016	0.422082
15	1.10127	0.00891316	0.410535	1.10029	-0.00900497	0.381466	1.09553	0.0224266	0.422504
15.01	1.10117	0.0113216	0.412649	1.10037	-0.00604892	0.384694	1.0953	0.0235207	0.422397
15.02	1.10104	0.0137635	0.414777	1.10041	-0.00312005	0.387834	1.09506	0.0243238	0.421828
15.03	1.10089	0.0162616	0.416953	1.10043	-0.000221675	0.390883	1.09482	0.0248776	0.420865
15.04	1.10072	0.0188278	0.419195	1.10042	0.00263956	0.39383	1.09457	0.0252246	0.419577
15.05	1.10051	0.0214618	0.421501	1.10038	0.00545328	0.39666	1.09431	0.0254065	0.418032
15.06	1.10029	0.0241513	0.423852	1.10031	0.0082051	0.399353	1.09406	0.0254631	0.416291
15.07	1.10003	0.0268714	0.426208	1.10021	0.0108766	0.40188	1.0938	0.0254311	0.414414
15.08	1.09975	0.0295861	0.428514	1.10009	0.0134456	0.404209	1.09355	0.0253432	0.412452
15.09	1.09944	0.032249	0.4307	1.09994	0.0158864	0.406302	1.0933	0.0252278	0.41045
15.1	1.0991	0.0348055	0.432681	1.09977	0.0181705	0.408118	1.09305	0.025108	0.408442
15.11	1.09874	0.0371947	0.434366	1.09958	0.0202676	0.409612	1.0928	0.0250017	0.406457
15.12	1.09836	0.0393522	0.43566	1.09937	0.0221465	0.41074	1.09255	0.0249215	0.404514
15.13	1.09796	0.0412127	0.436466	1.09914	0.0237763	0.411458	1.0923	0.024875	0.402623
15.14	1.09754	0.0427131	0.436692	1.09889	0.0251277	0.411724	1.09205	0.0248653	0.40079
15.15	1.0971	0.0437957	0.436256	1.09864	0.0261746	0.411504	1.0918	0.0248913	0.399011
15.16	1.09666	0.0444107	0.435087	1.09837	0.0268949	0.410767	1.09155	0.0249485	0.39728
15.17	1.09622	0.0445191	0.433133	1.0981	0.0272727	0.409495	1.0913	0.0250304	0.395585
15.18	1.09577	0.0440953	0.430362	1.09783	0.0272985	0.407679	1.09105	0.0251286	0.393914
15.19	1.09534	0.0431286	0.426768	1.09755	0.0269711	0.405321	1.0908	0.0252344	0.392254
15.2	1.09491	0.0416249	0.422365	1.09729	0.0262978	0.402439	1.09054	0.0253395	0.39059
15.21	1.09451	0.0396077	0.4172	1.09703	0.0252955	0.399064	1.09029	0.0254369	0.388913
15.22	1.09412	0.0371178	0.411343	1.09678	0.0239904	0.39524	1.09004	0.0255217	0.387216
15.23	1.09376	0.0342136	0.40489	1.09655	0.0224183	0.391028	1.08978	0.0255918	0.385494
15.24	1.09344	0.0309694	0.397961	1.09633	0.020624	0.3865	1.08952	0.0256486	0.383752
15.25	1.09315	0.0274741	0.390698	1.09614	0.0186606	0.381741	1.08927	0.0256971	0.381995
15.26	1.09289	0.0238285	0.383258	1.09596	0.0165881	0.376846	1.08901	0.0257465	0.380239
15.27	1.09267	0.0201429	0.375814	1.09581	0.0144726	0.371916	1.08875	0.0258095	0.378504
15.28	1.09249	0.0165337	0.368543	1.09567	0.0123835	0.367059	1.08849	0.0259027	0.376813
15.29	1.09234	0.0131196	0.361627	1.09556	0.0103925	0.362385	1.08823	0.0260461	0.375198
15.3	1.09222	0.0100182	0.355242	1.09546	0.00857092	0.358001	1.08797	0.0262623	0.373693
15.31	1.09214	0.00734184	0.349556	1.09539	0.00698759	0.35401	1.08771	0.0265758	0.372333
15.32	1.09207	0.00519412	0.34472	1.09532	0.00570646	0.350506	1.08744	0.0270123	0.371156
15.33	1.09203	0.00366605	0.340865	1.09527	0.00478437	0.347571	1.08717	0.0275976	0.370201
15.34	1.092	0.00283294	0.338099	1.09523	0.00426896	0.345273	1.08689	0.0283566	0.369502
15.35	1.09197	0.00275153	0.336495	1.09518	0.00419669	0.343661	1.0866	0.0293122	0.369093
15.36	1.09194	0.00345772	0.336099	1.09514	0.00459125	0.342765	1.0863	0.0304844	0.369001
15.37	1.0919	0.00496492	0.336918	1.09509	0.00546224	0.342592	1.08599	0.0318892	0.369246
15.38	1.09184	0.00726314	0.338924	1.09503	0.00680434	0.343127	1.08566	0.0335375	0.369843
15.39	1.09175	0.0103187	0.342055	1.09495	0.00859687	0.344331	1.08532	0.0354348	0.370796
15.4	1.09163	0.0140751	0.346211	1.09485	0.0108039	0.346142	1.08495	0.0375801	0.372099
15.41	1.09147	0.0184536	0.351262	1.09473	0.0133749	0.348475	1.08456	0.0399656	0.373736
15.42	1.09126	0.0233563	0.357047	1.09459	0.0162458	0.351229	1.08415	0.0425766	0.375683
15.43	1.091	0.0286679	0.363383	1.09441	0.0193404	0.35428	1.08371	0.0453913	0.3779
15.44	1.09068	0.0342594	0.370066	1.0942	0.022573	0.357495	1.08324	0.0483809	0.380343
15.45	1.09031	0.0399919	0.376878	1.09396	0.0258501	0.360728	1.08274	0.0515103	0.382953
15.46	1.08988	0.0457204	0.383595	1.09368	0.0290739	0.363829	1.08221	0.0547384	0.385666
15.47	1.0894	0.0512983	0.389994	1.09338	0.0321446	0.366646	1.08165	0.058019	0.38841
15.48	1.08886	0.0565818	0.395856	1.09304	0.0349645	0.369032	1.08105	0.0613017	0.391106
15.49	1.08827	0.0614344	0.400977	1.09268	0.0374404	0.370847	1.08042	0.0645331	0.393673
15.5	1.08763	0.0657305	0.405172	1.09229	0.0394874	0.371968	1.07976	0.0676582	0.396028
15.51	1.08695	0.0693601	0.408895	1.09189	0.0410317	0.372903	1.07907	0.0706212	0.398702
15.52	1.08625	0.0722312	0.411401	1.09147	0.0420132	0.372953	1.07835	0.0733675	0.400998
15.53	1.08551	0.0742734	0.412594	1.09105	0.0423885	0.37206	1.0776	0.0758444	0.40284
15.54	1.08476	0.0754395	0.412415	1.09063	0.0421323	0.370194	1.07683	0.0780031	0.404157
15.55	1.08401	0.0757074	0.410843	1.09021	0.0412391	0.367357	1.07604	0.0797993	0.404885
15.56	1.08325	0.0750803	0.407896	1.0898	0.0397242	0.363582	1.07524	0.0811949	0.404973
15.57	1.08251	0.0735868	0.403633	1.08942	0.0376235	0.358934	1.07442	0.0821587	0.404378
15.58	1.08178	0.0712801	0.398148	1.08905	0.0349936	0.353508	1.0736	0.0826671	0.403071
15.59	1.08108	0.0682363	0.391571	1.08872	0.0319103	0.347429	1.07277	0.0827052	0.401036
15.6	1.08042	0.0645517	0.384059	1.08842	0.0284672	0.340846	1.07194	0.0822667	0.398271
15.61	1.0798	0.0603404	0.375798	1.08815	0.024773	0.333932	1.07112	0.0813545	0.394788
15.62	1.07921	0.0557306	0.366992	1.08792	0.020949	0.326877	1.07032	0.0799806	0.390612
15.63	1.07868	0.0508607	0.357859	1.08773	0.0171258	0.319881	1.06953	0.0781657	0.385782
15.64	1.0782	0.045875	0.348624	1.08758	0.0134392	0.313154	1.06875	0.0759388	0.380349
15.65	1.07776	0.0409199	0.339513	1.08746	0.0100267	0.306903	1.06801	0.0733366	0.374377
15.66	1.07738	0.0361392	0.330745	1.08738	0.0070235	0.301332	1.06729	0.0704027	0.367936
15.67	1.07704	0.03167	0.322527	1.08732	0.00455794	0.29663	1.0666	0.0671863	0.361108
15.68	1.07674	0.0276391	0.31505	1.08728	0.00274805	0.292969	1.06595	0.0637412	0.35398
15.69	1.07648	0.0241589	0.308477	1.08726	0.00169764	0.290499	1.06533	0.0601249	0.346643
15.7	1.07626	0.0213249	0.302948	1.08724	0.00149303	0.289341	1.06474	0.0563966	0.33919
15.71	1.07606	0.0192132	0.298567	1.08723	0.00220016	0.289581	1.0642	0.0526163	0.331715
15.72	1.07587	0.0178782	0.295408	1.0872	0.00386232	0.291272	1.06369	0.0488436	0.32431
15.73	1.0757	0.0173518	0.293508	1.08715	0.00649852	0.294428	1.06322	0.0451357	0.317062
15.74	1.07552	0.0176428	0.292867	1.08706	0.0101025	0.299026	1.06279	0.041547	0.310053
15.75	1.07534	0.0187375	0.293452	1.08694	0.0146428	0.305001	1.06239	0.0381274	0.303359
15.76	1.07514	0.0205999	0.295195	1.08677	0.0200627	0.312253	1.06202	0.0349216	0.297045
15.77	1.07492	0.0231741	0.297998	1.08654	0.0262822	0.320645	1.06169	0.0319681	0.291166
15.78	1.07468	0.0263858	0.301738	1.08624	0.0331997	0.33001	1.06138	0.0292985	0.285768
15.79	1.0744	0.0301453	0.306267	1.08587	0.0406946	0.340152	1.0611	0.0269372	0.280882
15.8	1.07407	0.0343501	0.31142	1.08542	0.0486307	0.350854	1.06084	0.0249009	0.27653
15.81	1.07371	0.038889	0.317019	1.0849	0.0568596	0.361882	1.0606	0.0231989	0.272722
15.82	1.07329	0.0436448	0.32288	1.08429	0.0652252	0.372993	1.06038	0.0218327	0.269453
15.83	1.07283	0.0484981	0.328818	1.08359	0.0735674	0.383938	1.06017	0.0207966	0.266711
15.84	1.07232	0.0533313	0.334649	1.08282	0.0817271	0.394476	1.05996	0.0200783	0.264471
15.85	1.07177	0.0580313	0.340202	1.08196	0.08955	0.404373	1.05976	0.0196592	0.2627
15.86	1.07116	0.0624929	0.345318	1.08103	0.0968911	0.413411	1.05957	0.0195155	0.261358
15.87	1.07052	0.0666217	0.349856	1.08002	0.103619	0.421397	1.05937	0.0196189	0.260395
15.88	1.06983	0.0703361	0.353696	1.07896	0.109617	0.428164	1.05917	0.0199376	0.259761
15.89	1.06911	0.0735697	0.356742	1.07783	0.114791	0.433576	1.05897	0.0204377	0.259399
15.9	1.06836	0.0762719	0.358925	1.07666	0.119067	0.437534	1.05876	0.0210835	0.259253
15.91	1.06759	0.0784096	0.360203	1.07545	0.122395	0.439974	1.05855	0.0218393	0.259265
15.92	1.0668	0.0799665	0.360558	1.07422	0.124748	0.440871	1.05833	0.0226702	0.25938
15.93	1.06599	0.0809435	0.360002	1.07296	0.126126	0.44024	1.0581	0.0235428	0.259547
15.94	1.06518	0.0813575	0.358569	1.0717	0.126553	0.43813	1.05786	0.0244264	0.259716
15.95	1.06437	0.0812406	0.356317	1.07043	0.126074	0.434629	1.05761	0.0252937	0.259848
15.96	1.06356	0.0806377	0.353324	1.06918	0.124757	0.429852	1.05735	0.0261214	0.259905
15.97	1.06275	0.0796052	0.349681	1.06794	0.122688	0.423944	1.05708	0.0268907	0.25986
15.98	1.06196	0.0782083	0.345497	1.06673	0.119969	0.417071	1.05681	0.0275876	0.259692
15.99	1.06119	0.0765185	0.340886	1.06554	0.116711	0.409418	1.05653	0.0282032	0.259389
16	1.06043	0.0746116	0.335969	1.06439	0.113038	0.401178	1.05625	0.0287334	0.258946
16.01	1.0597	0.0725645	0.330867	1.06328	0.109074	0.392551	1.05596	0.0291792	0.258366
16.02	1.05898	0.0704529	0.325697	1.06221	0.104947	0.383734	1.05566	0.029546	0.257658
16.03	1.05829	0.0683493	0.320573	1.06119	0.100778	0.374917	1.05537	0.0298434	0.256838
16.04	1.05762	0.0663205	0.315595	1.0602	0.0966834	0.366279	1.05507	0.0300846	0.255927
16.05	1.05696	0.0644257	0.310854	1.05925	0.0927678	0.357977	1.05477	0.0302854	0.254951
16.06	1.05633	0.0627155	0.306424	1.05834	0.0891227	0.35015	1.05446	0.0304639	0.253937
16.07	1.05571	0.06123	0.302365	1.05747	0.0858234	0.342908	1.05416	0.0306392	0.252916
16.08	1.0551	0.0599986	0.298718	1.05662	0.0829277	0.336335	1.05385	0.0308312	0.251918
16.09	1.05451	0.059039	0.295506	1.05581	0.0804743	0.330483	1.05354	0.031059	0.250972
16.1	1.05392	0.0583578	0.292734	1.05501	0.0784826	0.325376	1.05323	0.0313406	0.250105
16.11	1.05334	0.0579502	0.290392	1.05424	0.0769523	0.321006	1.05291	0.0316919	0.24934
16.12	1.05276	0.0578009	0.288452	1.05347	0.0758647	0.317338	1.05259	0.0321259	0.248696
16.13	1.05218	0.0578851	0.286871	1.05272	0.075184	0.314308	1.05227	0.0326525	0.248187
16.14	1.0516	0.0581697	0.285596	1.05197	0.0748588	0.311834	1.05194	0.0332777	0.247821
16.15	1.05102	0.0586144	0.284561	1.05122	0.0748251	0.30981	1.0516	0.0340032	0.2476
16.16	1.05043	0.0591734	0.283694	1.05047	0.0750084	0.308119	1.05126	0.0348266	0.247516
16.17	1.04983	0.0597976	0.282919	1.04972	0.0753275	0.306633	1.05091	0.0357409	0.24756
16.18	1.04923	0.0604352	0.282154	1.04896	0.075697	0.305219	1.05054	0.036735	0.247711
16.19	1.04862	0.0610345	0.281321	1.0482	0.0760313	0.303745	1.05017	0.0377937	0.247946
16.2	1.04801	0.0615449	0.280343	1.04744	0.0762471	0.302085	1.04979	0.0388984	0.248235
16.21	1.04739	0.0619187	0.279147	1.04668	0.076267	0.300122	1.04939	0.0400276	0.248544
16.22	1.04677	0.0621126	0.27767	1.04592	0.0760223	0.297753	1.04899	0.0411574	0.248837
16.23	1.04615	0.0620885	0.275857	1.04516	0.075455	0.294893	1.04857	0.0422625	0.249075
16.24	1.04553	0.0618154	0.273663	1.04441	0.0745202	0.29148	1.04814	0.0433171	0.249218
16.25	1.04492	0.0612694	0.271055	1.04367	0.0731874	0.287473	1.0477	0.0442956	0.249229
16.26	1.04431	0.0604349	0.268014	1.04295	0.0714418	0.282853	1.04726	0.0451737	0.249071
16.27	1.04371	0.0593046	0.264533	1.04224	0.0692842	0.27763	1.0468	0.0459292	0.248712
16.28	1.04312	0.0578802	0.260619	1.04156	0.0667315	0.271836	1.04634	0.046543	0.248124
16.29	1.04255	0.0561716	0.256292	1.04091	0.0638152	0.265524	1.04587	0.0469998	0.247286
16.3	1.042	0.0541972	0.251584	1.04029	0.0605812	0.25877	1.0454	0.0472887	0.246184
16.31	1.04147	0.0519835	0.246541	1.0397	0.0570872	0.251669	1.04492	0.0474038	0.244812
16.32	1.04096	0.0495639	0.241216	1.03914	0.0534014	0.244328	1.04445	0.0473449	0.243172
16.33	1.04048	0.0469782	0.235675	1.03863	0.0495995	0.236865	1.04398	0.0471171	0.241274
16.34	1.04002	0.0442717	0.229988	1.03815	0.0457626	0.229408	1.04351	0.0467314	0.239138
16.35	1.03959	0.0414941	0.224235	1.03771	0.0419743	0.222085	1.04304	0.0462044	0.236791
16.36	1.03919	0.0386983	0.218496	1.03731	0.038318	0.215022	1.04258	0.0455577	0.23427
16.37	1.03882	0.035939	0.212856	1.03695	0.034874	0.20834	1.04213	0.0448178	0.231615
16.38	1.03847	0.0332718	0.2074	1.03661	0.0317173	0.202151	1.04169	0.0440151	0.228876
16.39	1.03815	0.0307516	0.20221	1.03631	0.0289148	0.196553	1.04125	0.0431832	0.226105
16.4	1.03786	0.0284316	0.197365	1.03603	0.026524	0.191628	1.04082	0.0423576	0.223356
16.41	1.03758	0.0263619	0.192939	1.03578	0.0245907	0.18744	1.0404	0.0415753	0.220686
16.42	1.03733	0.0245882	0.188998	1.03554	0.0231481	0.184034	1.03999	0.0408729	0.218151
16.43	1.03709	0.0231512	0.1856	1.03531	0.0222161	0.181431	1.03959	0.0402858	0.215803
16.44	1.03686	0.0220851	0.182792	1.03509	0.0218008	0.179634	1.03919	0.0398471	0.213691
16.45	1.03665	0.0214169	0.180609	1.03488	0.0218948	0.178622	1.03879	0.0395861	0.211858
16.46	1.03643	0.0211658	0.179075	1.03465	0.0224777	0.178357	1.03839	0.0395276	0.210339
16.47	1.03622	0.0213425	0.178199	1.03442	0.0235173	0.178783	1.038	0.0396908	0.209161
16.48	1.036	0.0219488	0.177979	1.03418	0.0249707	0.179826	1.0376	0.0400886	0.208339
16.49	1.03578	0.0229776	0.178396	1.03392	0.0267863	0.181401	1.03719	0.0407267	0.207878
16.5	1.03554	0.0244127	0.179419	1.03365	0.0289055	0.183412	1.03678	0.0416038	0.207774
16.51	1.03529	0.0262288	0.181004	1.03334	0.0312649	0.185759	1.03636	0.0427109	0.208008
16.52	1.03502	0.0283926	0.183092	1.03302	0.0337984	0.188336	1.03593	0.0440318	0.208553
16.53	1.03472	0.0308626	0.185616	1.03267	0.0364395	0.191038	1.03548	0.045543	0.209368
16.54	1.0344	0.0335905	0.188497	1.03229	0.0391232	0.193765	1.03502	0.0472146	0.210406
16.55	1.03405	0.0365219	0.191647	1.03189	0.0417884	0.196422	1.03453	0.0490111	0.211609
16.56	1.03367	0.039598	0.194973	1.03145	0.0443792	0.198924	1.03404	0.0508921	0.212914
16.57	1.03326	0.0427562	0.198378	1.031	0.0468466	0.201197	1.03352	0.0528141	0.214252
16.58	1.03281	0.0459321	0.201761	1.03052	0.0491498	0.203182	1.03298	0.0547311	0.215554
16.59	1.03234	0.0490613	0.205024	1.03002	0.0512571	0.20483	1.03242	0.0565965	0.216746
16.6	1.03183	0.0520804	0.208069	1.02949	0.0531463	0.206113	1.03185	0.0583647	0.217762
16.61	1.0313	0.0549293	0.210808	1.02895	0.0548047	0.207013	1.03125	0.0599923	0.218534
16.62	1.03073	0.0575525	0.213158	1.0284	0.0562293	0.207529	1.03065	0.0614398	0.219006
16.63	1.03015	0.0599011	0.215047	1.02783	0.057426	0.207675	1.03003	0.0626729	0.219128
16.64	1.02954	0.0619338	0.216415	1.02725	0.0584089	0.207475	1.02939	0.063664	0.21886
16.65	1.02891	0.0636185	0.21722	1.02666	0.0591991	0.206966	1.02875	0.0643931	0.218175
16.66	1.02826	0.0649334	0.217433	1.02607	0.0598236	0.20619	1.02811	0.0648485	0.217061
16.67	1.02761	0.0658679	0.217044	1.02547	0.0603135	0.205199	1.02746	0.0650281	0.215517
16.68	1.02695	0.0664231	0.216059	1.02486	0.060703	0.204046	1.02681	0.0649387	0.213559
16.69	1.02628	0.0666118	0.214505	1.02425	0.0610275	0.202788	1.02616	0.0645971	0.211216
16.7	1.02562	0.066459	0.212425	1.02364	0.061322	0.20148	1.02552	0.0640291	0.208531
16.71	1.02495	0.0660009	0.20988	1.02302	0.0616198	0.200171	1.02488	0.0632692	0.205562
16.72	1.0243	0.0652843	0.206947	1.02241	0.0619514	0.19891	1.02425	0.0623595	0.202376
16.73	1.02365	0.0643654	0.203715	1.02179	0.0623431	0.197736	1.02363	0.0613489	0.199048
16.74	1.02301	0.0633084	0.200286	1.02116	0.062816	0.196681	1.02302	0.0602913	0.195665
16.75	1.02238	0.0621834	0.196769	1.02053	0.0633858	0.195766	1.02243	0.0592442	0.192314
16.76	1.02177	0.0610649	0.19328	1.01989	0.0640619	0.195005	1.02184	0.0582667	0.189086
16.77	1.02116	0.0600287	0.189934	1.01925	0.0648479	0.194402	1.02126	0.0574178	0.186069
16.78	1.02057	0.0591504	0.186845	1.01859	0.0657409	0.193951	1.02069	0.0567544	0.18335
16.79	1.01998	0.0585024	0.184123	1.01793	0.0667328	0.193637	1.02012	0.0563292	0.181006
16.8	1.01939	0.0581515	0.181866	1.01726	0.0678102	0.193439	1.01956	0.056189	0.179104
16.81	1.01881	0.0581567	0.180159	1.01657	0.0689556	0.193329	1.019	0.056373	0.177701
16.82	1.01823	0.0585667	0.179072	1.01588	0.0701481	0.193273	1.01843	0.056911	0.176837
16.83	1.01764	0.0594185	0.178654	1.01517	0.0713647	0.193235	1.01786	0.0578224	0.176537
16.84	1.01704	0.0607351	0.178936	1.01445	0.0725811	0.193179	1.01728	0.0591152	0.176806
16.85	1.01642	0.0625248	0.179921	1.01372	0.0737731	0.193066	1.01668	0.0607851	0.177632
16.86	1.01579	0.06478	0.181591	1.01298	0.0749175	0.192862	1.01606	0.0628154	0.178985
16.87	1.01513	0.0674772	0.183903	1.01222	0.0759931	0.192535	1.01542	0.0651771	0.180813
16.88	1.01444	0.0705769	0.18679	1.01146	0.0769817	0.192059	1.01475	0.0678294	0.183051
16.89	1.01371	0.0740245	0.190161	1.01068	0.0778686	0.191411	1.01406	0.0707206	0.185612
16.9	1.01295	0.0777515	0.193907	1.0099	0.0786436	0.190579	1.01334	0.0737891	0.188401
16.91	1.01216	0.0816771	0.1979	1.00911	0.0793006	0.189554	1.01258	0.0769652	0.191307
16.92	1.01132	0.0857103	0.201996	1.00831	0.0798384	0.188336	1.0118	0.0801731	0.194213
16.93	1.01044	0.089753	0.206045	1.00751	0.0802603	0.186933	1.01098	0.0833325	0.196995
16.94	1.00953	0.093702	0.209889	1.00671	0.080574	0.185358	1.01013	0.0863614	0.199529
16.95	1.00857	0.097453	0.213368	1.0059	0.0807909	0.183629	1.00925	0.0891782	0.201691
16.96	1.00758	0.100903	0.216329	1.00509	0.0809257	0.181772	1.00835	0.091704	0.203364
16.97	1.00655	0.103954	0.218626	1.00428	0.0809956	0.179813	1.00742	0.0938656	0.204441
16.98	1.0055	0.106517	0.220129	1.00347	0.0810193	0.177783	1.00647	0.0955969	0.204826
16.99	1.00442	0.108514	0.220724	1.00266	0.0810165	0.175711	1.00551	0.0968418	0.20444
17	1.00333	0.109879	0.220323	1.00185	0.0810062	0.173629	1.00454	0.0975553	0.203221
17.01	1.00223	0.110565	0.219169	1.00104	0.0810068	0.17187	1.00356	0.0977058	0.201437
17.02	1.00112	0.110541	0.216918	1.00023	0.0810343	0.170153	1.00259	0.0972756	0.198761
17.03	1.00002	0.109798	0.213566	0.999421	0.0811021	0.168497	1.00162	0.096262	0.195199
17.04	0.998929	0.108344	0.209137	0.998609	0.0812204	0.166918	1.00066	0.0946774	0.190779
17.05	0.997855	0.10621	0.20369	0.997796	0.0813952	0.165423	0.999726	0.0925496	0.185552
17.06	0.996806	0.103445	0.197309	0.996981	0.0816284	0.164015	0.998813	0.0899207	0.17959
17.07	0.995788	0.100116	0.190108	0.996163	0.0819177	0.162689	0.997928	0.0868464	0.172987
17.08	0.994805	0.0963078	0.182225	0.995342	0.0822563	0.161434	0.997077	0.0833943	0.165853
17.09	0.993863	0.0921189	0.173818	0.994518	0.0826335	0.160233	0.996261	0.0796426	0.158314
17.1	0.992964	0.0876585	0.16506	0.99369	0.0830347	0.159063	0.995485	0.0756774	0.150506
17.11	0.99211	0.0830437	0.156134	0.992857	0.0834422	0.157896	0.994748	0.0715906	0.142572
17.12	0.991303	0.0783957	0.147228	0.992021	0.0838359	0.156702	0.994053	0.0674773	0.134661
17.13	0.990542	0.0738363	0.13853	0.99118	0.084194	0.155447	0.993398	0.0634332	0.12692
17.14	0.989825	0.0694833	0.130218	0.990337	0.0844936	0.154098	0.992783	0.0595515	0.119489
17.15	0.989151	0.0654474	0.122459	0.98949	0.0847122	0.152619	0.992206	0.0559209	0.112503
17.16	0.988515	0.0618283	0.115399	0.988643	0.0848279	0.15098	0.991663	0.0526223	0.106081
17.17	0.987912	0.0587115	0.109165	0.987794	0.0848209	0.149151	0.991152	0.0497271	0.100327
17.18	0.987338	0.0561655	0.103852	0.986946	0.0846738	0.147108	0.990667	0.0472948	0.0953262
17.19	0.986787	0.0542396	0.0995276	0.986101	0.0843725	0.144831	0.990204	0.0453716	0.0911422
17.2	0.986251	0.0529624	0.0962259	0.985259	0.0839069	0.142307	0.989758	0.0439885	0.0878148
17.21	0.985725	0.0523406	0.0939471	0.984423	0.0832713	0.13953	0.989322	0.0431612	0.0853594
17.22	0.985202	0.0523591	0.0926581	0.983594	0.0824644	0.1365	0.988892	0.0428892	0.0837667
17.23	0.984676	0.0529816	0.0922932	0.982774	0.0814899	0.133227	0.988463	0.043156	0.083003
17.24	0.98414	0.0541517	0.0927569	0.981965	0.0803561	0.129724	0.988027	0.0439296	0.083011
17.25	0.983591	0.0557951	0.093927	0.981167	0.079076	0.126016	0.987582	0.0451636	0.0837116
17.26	0.983023	0.057822	0.0956589	0.980384	0.0776668	0.122129	0.987123	0.0467984	0.0850068
17.27	0.982433	0.0601309	0.0977909	0.979614	0.0761491	0.118097	0.986645	0.0487632	0.0867819
17.28	0.98182	0.0626112	0.10015	0.978861	0.074547	0.11396	0.986146	0.0509782	0.0889095
17.29	0.981181	0.0651481	0.102557	0.978123	0.0728868	0.109759	0.985625	0.0533564	0.0912529
17.3	0.980517	0.0676261	0.104835	0.977403	0.0711964	0.105537	0.985079	0.0558069	0.0936703
17.31	0.979828	0.0699333	0.106813	0.976699	0.0695045	0.101339	0.984508	0.058237	0.0960187
17.32	0.979119	0.0719653	0.108334	0.976012	0.0678399	0.0972087	0.983914	0.0605553	0.0981583
17.33	0.97839	0.0736288	0.10926	0.975342	0.0662304	0.0931884	0.983298	0.0626739	0.0999565
17.34	0.977647	0.0748452	0.109476	0.974687	0.0647024	0.0893175	0.982662	0.064511	0.101291
17.35	0.976895	0.0755531	0.108894	0.974047	0.0632796	0.0856314	0.982009	0.0659933	0.102054
17.36	0.976138	0.0757105	0.107459	0.973421	0.0619832	0.0821606	0.981343	0.0670579	0.102155
17.37	0.975382	0.0752961	0.105146	0.972807	0.0608307	0.07893	0.980669	0.0676538	0.101522
17.38	0.974634	0.0743102	0.101965	0.972204	0.0598358	0.0759583	0.979991	0.0677434	0.100105
17.39	0.973898	0.0727744	0.0979571	0.97161	0.059008	0.0732578	0.979316	0.0673031	0.0978747
17.4	0.97318	0.0707305	0.0931952	0.971023	0.0583525	0.0708339	0.978647	0.0663237	0.0948265
17.41	0.972484	0.0682391	0.0877798	0.970442	0.0578704	0.0686854	0.977991	0.0648106	0.0909762
17.42	0.971816	0.0653767	0.0818349	0.969865	0.0575582	0.0668044	0.977352	0.062783	0.0863617
17.43	0.971178	0.0622333	0.075504	0.96929	0.0574086	0.0651772	0.976736	0.0602732	0.0810403
17.44	0.970572	0.0589082	0.0689434	0.968716	0.0574105	0.0637841	0.976148	0.0573252	0.0750868
17.45	0.97	0.0555063	0.0623166	0.968141	0.0575493	0.0626005	0.975591	0.0539931	0.0685908
17.46	0.969461	0.0521341	0.0557878	0.967564	0.0578074	0.0615974	0.975069	0.0503393	0.0616538
17.47	0.968956	0.0488952	0.0495149	0.966984	0.0581648	0.0607423	0.974585	0.0464325	0.0543856
17.48	0.968482	0.0458861	0.0436438	0.9664	0.0585992	0.0599995	0.974141	0.042345	0.046901
17.49	0.968037	0.0431923	0.0383019	0.965812	0.0590869	0.0593317	0.973738	0.0381508	0.0393162
17.5	0.967617	0.040885	0.033593	0.965218	0.059603	0.0586997	0.973378	0.0339234	0.0317451
17.51	0.967218	0.0390175	0.0295929	0.96462	0.060122	0.0580641	0.973059	0.0297331	0.0242959
17.52	0.966835	0.0376233	0.0263461	0.964016	0.0606179	0.0573854	0.972782	0.0256454	0.0170684
17.53	0.966464	0.0367143	0.0238634	0.963407	0.0610652	0.0566243	0.972546	0.0217189	0.0101506
17.54	0.966099	0.0362798	0.0221211	0.962795	0.0614384	0.0557431	0.972347	0.0180039	0.00361703
17.55	0.965736	0.0362869	0.0210613	0.962179	0.061713	0.0547051	0.972185	0.014541	-0.0024735
17.56	0.965372	0.0366809	0.0205937	0.961561	0.0618653	0.0534757	0.972055	0.0113602	-0.00807897
17.57	0.965001	0.0373875	0.0205984	0.960942	0.0618727	0.0520221	0.971956	0.00848024	-0.0131748
17.58	0.964623	0.0383151	0.0209303	0.960323	0.061714	0.0503141	0.971884	0.00590889	-0.017754
17.59	0.964235	0.0393579	0.0214243	0.959708	0.0613693	0.0483237	0.971837	0.00364269	-0.0218265
17.6	0.963836	0.0404	0.021901	0.959097	0.0608202	0.0460258	0.97181	0.00166775	-0.0254183
17.61	0.963427	0.0413196	0.0221739	0.958492	0.06005	0.0433979	0.971802	-3.93443e-05	-0.0285698
17.62	0.96301	0.0419934	0.0220563	0.957896	0.0590438	0.0404206	0.97181	-0.00151033	-0.0313336
17.63	0.962588	0.0423014	0.0213683	0.957312	0.0577886	0.0370775	0.971832	-0.0027838	-0.0337725
17.64	0.962165	0.0421319	0.0199443	0.956741	0.0562734	0.0333556	0.971865	-0.00390352	-0.0359566
17.65	0.961747	0.0413855	0.0176397	0.956187	0.0544894	0.0292457	0.971909	-0.00491663	-0.0379602
17.66	0.96134	0.0399793	0.0143367	0.955652	0.0524305	0.0247423	0.971963	-0.00587178	-0.0398596
17.67	0.96095	0.0378509	0.00994958	0.955139	0.0500929	0.019844	0.972026	-0.00681721	-0.0417295
17.68	0.960585	0.0349608	0.00442917	0.954651	0.0474761	0.0145543	0.972099	-0.00779897	-0.0436405
17.69	0.960253	0.0312946	-0.0022347	0.95419	0.0445826	0.00888133	0.972182	-0.00885914	-0.0456565
17.7	0.959961	0.0268646	-0.0100115	0.95376	0.0414185	0.00283858	0.972277	-0.0100344	-0.0478323
17.71	0.959718	0.0217095	-0.0188298	0.953363	0.0379934	-0.00355484	0.972383	-0.0113544	-0.0502118
17.72	0.959529	0.0158944	-0.0285792	0.953001	0.0343212	-0.010274	0.972504	-0.0128412	-0.0528262
17.73	0.959402	0.00950874	-0.0391123	0.952677	0.0304196	-0.0172877	0.972641	-0.014508	-0.0556934
17.74	0.95934	0.002664	-0.0502498	0.952393	0.0263106	-0.0245589	0.972795	-0.0163589	-0.0588167
17.75	0.959349	-0.00450956	-0.0617852	0.952151	0.0220205	-0.0320439	0.972968	-0.0183887	-0.0621854
17.76	0.959431	-0.011867	-0.0734914	0.951953	0.0175799	-0.0396934	0.973163	-0.0205833	-0.065775
17.77	0.959586	-0.0192532	-0.0851283	0.9518	0.0130233	-0.0474521	0.97338	-0.0229196	-0.0695478
17.78	0.959815	-0.0265078	-0.0964499	0.951692	0.00838887	-0.0552597	0.973621	-0.0253668	-0.0734544
17.79	0.960115	-0.0334706	-0.107213	0.951632	0.00371837	-0.0630512	0.973888	-0.0278873	-0.0774355
17.8	0.960483	-0.0399866	-0.117185	0.951618	-0.000943797	-0.0707581	0.974179	-0.0304377	-0.0814236
17.81	0.960913	-0.0459114	-0.126151	0.95165	-0.00555104	-0.0783091	0.974496	-0.0329706	-0.0853455
17.82	0.961399	-0.0511157	-0.133924	0.951728	-0.0100554	-0.0856316	0.974838	-0.0354357	-0.0891246
17.83	0.961932	-0.0554901	-0.140345	0.951851	-0.0144084	-0.092653	0.975204	-0.0377816	-0.0926832
17.84	0.962505	-0.0589482	-0.145297	0.952016	-0.0185619	-0.0993022	0.975593	-0.0399575	-0.0959455
17.85	0.963108	-0.06143	-0.148701	0.952221	-0.0224695	-0.105511	0.976002	-0.0419147	-0.0988394
17.86	0.96373	-0.0629038	-0.150523	0.952464	-0.026087	-0.111215	0.97643	-0.0436078	-0.101299
17.87	0.964362	-0.0633669	-0.150776	0.952741	-0.0293739	-0.116358	0.976873	-0.0449967	-0.103267
17.88	0.964994	-0.0628462	-0.149516	0.95305	-0.0322942	-0.120889	0.977329	-0.0460472	-0.104695
17.89	0.965616	-0.061397	-0.146843	0.953386	-0.0348178	-0.124767	0.977793	-0.0467323	-0.105548
17.9	0.966219	-0.059101	-0.142895	0.953745	-0.0369204	-0.127963	0.978262	-0.0470327	-0.105801
17.91	0.966795	-0.0560635	-0.137848	0.954122	-0.0385855	-0.130456	0.978732	-0.0469375	-0.105444
17.92	0.967338	-0.0524098	-0.131905	0.954515	-0.0398038	-0.13224	0.979199	-0.0464446	-0.10448
17.93	0.967842	-0.0482809	-0.125291	0.954917	-0.0405747	-0.13332	0.979659	-0.0455602	-0.102924
17.94	0.968302	-0.0438285	-0.118245	0.955324	-0.0409056	-0.133715	0.980109	-0.0442988	-0.100805
17.95	0.968718	-0.03921	-0.111014	0.955733	-0.0408124	-0.133455	0.980544	-0.0426828	-0.0981623
17.96	0.969086	-0.0345828	-0.103841	0.956139	-0.0403192	-0.132585	0.980961	-0.0407417	-0.0950468
17.97	0.96941	-0.0300993	-0.0969586	0.956538	-0.0394576	-0.131158	0.981358	-0.0385111	-0.0915181
17.98	0.969689	-0.0259015	-0.0905832	0.956927	-0.0382664	-0.12924	0.98173	-0.0360315	-0.0876427
17.99	0.969929	-0.0221165	-0.0849042	0.957302	-0.0367906	-0.126905	0.982077	-0.0333477	-0.0834928
18	0.970133	-0.0188519	-0.0800804	0.957662	-0.0350801	-0.124233	0.982397	-0.0305069	-0.0791439
18.01	0.970308	-0.0161928	-0.0762336	0.958003	-0.0331887	-0.121311	0.982687	-0.0275577	-0.0746728
18.02	0.970459	-0.0141988	-0.073446	0.958325	-0.0311726	-0.118227	0.982947	-0.0245488	-0.070156
18.03	0.970594	-0.0129025	-0.0717571	0.958626	-0.0290893	-0.115071	0.983178	-0.021528	-0.0656671
18.04	0.970719	-0.0123086	-0.0711634	0.958907	-0.0269956	-0.111932	0.983378	-0.0185406	-0.0612759
18.05	0.970842	-0.0123944	-0.0716192	0.959166	-0.0249467	-0.108893	0.983549	-0.0156286	-0.0570461
18.06	0.970969	-0.0131108	-0.0730388	0.959406	-0.022994	-0.106033	0.983691	-0.0128298	-0.0530344
18.07	0.971106	-0.0143844	-0.0753004	0.959626	-0.0211846	-0.103423	0.983806	-0.0101769	-0.0492893
18.08	0.971258	-0.016121	-0.0782509	0.95983	-0.0195594	-0.101123	0.983895	-0.00769727	-0.0458502
18.09	0.971429	-0.018209	-0.0817125	0.960018	-0.0181524	-0.0991812	0.98396	-0.0054121	-0.042747
18.1	0.971623	-0.0205237	-0.0854888	0.960193	-0.0169897	-0.0976354	0.984003	-0.00333644	-0.0399996
18.11	0.97184	-0.0229324	-0.0893731	0.960358	-0.0160889	-0.0965084	0.984027	-0.00147912	-0.0376184
18.12	0.972081	-0.025299	-0.0931559	0.960516	-0.0154589	-0.0958098	0.984033	0.00015714	-0.0356041
18.13	0.972345	-0.0274895	-0.0966325	0.960668	-0.0150993	-0.0955348	0.984025	0.00157543	-0.0339487
18.14	0.97263	-0.0293768	-0.0996112	0.960819	-0.0150012	-0.0956657	0.984002	0.0027842	-0.0326359
18.15	0.972931	-0.0308454	-0.10192	0.960969	-0.0151472	-0.0961717	0.983969	0.00379675	-0.0316419
18.16	0.973245	-0.0317954	-0.103412	0.961122	-0.0155122	-0.0970106	0.983927	0.00463054	-0.0309372
18.17	0.973565	-0.0321464	-0.103972	0.96128	-0.0160642	-0.0981302	0.983877	0.00530647	-0.0304869
18.18	0.973885	-0.03184	-0.10352	0.961444	-0.0167657	-0.0994699	0.983821	0.00584813	-0.0302525
18.19	0.974199	-0.030842	-0.102015	0.961615	-0.0175745	-0.100963	0.98376	0.006281	-0.0301929
18.2	0.974499	-0.0291432	-0.0994521	0.961795	-0.0184455	-0.102539	0.983696	0.00663161	-0.0302659
18.21	0.974779	-0.0267599	-0.0958675	0.961984	-0.019332	-0.104125	0.983628	0.00692684	-0.030429
18.22	0.975032	-0.0237326	-0.0913339	0.962181	-0.0201874	-0.10565	0.983557	0.0071931	-0.030641
18.23	0.975252	-0.0201247	-0.0859582	0.962387	-0.0209661	-0.107045	0.983484	0.00745571	-0.0308626
18.24	0.975433	-0.0160198	-0.0798773	0.9626	-0.0216258	-0.108245	0.983408	0.00773827	-0.0310577
18.25	0.975571	-0.0115182	-0.0732525	0.962819	-0.0221281	-0.109194	0.983328	0.00806211	-0.031194
18.26	0.975662	-0.00673354	-0.0662638	0.963042	-0.0224399	-0.109843	0.983246	0.00844585	-0.0312435
18.27	0.975705	-0.00178815	-0.0591028	0.963267	-0.0225346	-0.110156	0.983159	0.00890506	-0.0311833
18.28	0.975698	0.00319135	-0.0519658	0.963492	-0.0223925	-0.110104	0.983067	0.00945197	-0.030996
18.29	0.975641	0.00807874	-0.0450466	0.963714	-0.0220015	-0.109674	0.98297	0.0100953	-0.0306695
18.3	0.975536	0.0127527	-0.0385295	0.963931	-0.0213574	-0.108862	0.982865	0.0108401	-0.0301975
18.31	0.975387	0.0171011	-0.0325826	0.96414	-0.0204639	-0.107678	0.982752	0.0116879	-0.0295793
18.32	0.975196	0.0210251	-0.0273527	0.964339	-0.0193323	-0.106144	0.982631	0.0126366	-0.0288198
18.33	0.974968	0.0244419	-0.0229594	0.964526	-0.017981	-0.104291	0.982499	0.0136805	-0.027929
18.34	0.974709	0.0272882	-0.0194923	0.964698	-0.0164349	-0.10216	0.982356	0.0148108	-0.0269221
18.35	0.974424	0.0295211	-0.0170077	0.964853	-0.0147245	-0.0998016	0.982202	0.0160156	-0.0258186
18.36	0.97412	0.03112	-0.0155281	0.964991	-0.0128847	-0.0972716	0.982036	0.01728	-0.0246424
18.37	0.973803	0.0320863	-0.0150414	0.965111	-0.0109539	-0.0946306	0.981856	0.0185868	-0.0234208
18.38	0.97348	0.0324427	-0.0155033	0.96521	-0.00897227	-0.0919416	0.981664	0.0199164	-0.0221843
18.39	0.973156	0.0322317	-0.0168391	0.96529	-0.00698112	-0.0892686	0.981458	0.0212475	-0.0209661
18.4	0.972837	0.0315134	-0.0189481	0.96535	-0.00502103	-0.0866738	0.981239	0.0225573	-0.019801
18.41	0.972527	0.0303625	-0.0217081	0.96539	-0.00313094	-0.0842163	0.981007	0.0238218	-0.0187255
18.42	0.972231	0.028865	-0.0249809	0.965413	-0.00134688	-0.0819503	0.980762	0.0250162	-0.0177767
18.43	0.971951	0.027114	-0.0286186	0.965418	0.000298931	-0.0799234	0.980506	0.0261157	-0.0169916
18.44	0.971689	0.0252061	-0.0324694	0.965407	0.00177901	-0.0781755	0.98024	0.0270953	-0.016407
18.45	0.971446	0.0232369	-0.0363845	0.965382	0.00307123	-0.076738	0.979965	0.0279307	-0.0160581
18.46	0.971224	0.0212972	-0.0402241	0.965346	0.00415926	-0.075633	0.979682	0.0285986	-0.0159787
18.47	0.97102	0.0194692	-0.0438629	0.9653	0.00503284	-0.074873	0.979393	0.029077	-0.0161996
18.48	0.970834	0.017823	-0.047195	0.965246	0.00568777	-0.0744611	0.979101	0.0293457	-0.0167488
18.49	0.970662	0.0164143	-0.0501382	0.965186	0.00612575	-0.0743914	0.978807	0.029387	-0.0176504
18.5	0.970504	0.0152819	-0.0526369	0.965124	0.00635396	-0.0746496	0.978514	0.0291855	-0.0189241
18.51	0.970356	0.0144463	-0.054356	0.96506	0.00638454	-0.074906	0.978224	0.0287293	-0.0202772
18.52	0.970214	0.0139094	-0.0556049	0.964997	0.00623387	-0.0754404	0.97794	0.0280095	-0.0220266
18.53	0.970076	0.0136547	-0.0564138	0.964936	0.00592176	-0.0762196	0.977664	0.0270213	-0.0241759
18.54	0.96994	0.0136481	-0.056839	0.964878	0.00547049	-0.0772069	0.9774	0.0257636	-0.0267224
18.55	0.969803	0.0138399	-0.0569603	0.964826	0.00490391	-0.0783638	0.97715	0.0242397	-0.0296571
18.56	0.969662	0.0141674	-0.0568771	0.96478	0.00424646	-0.079651	0.976916	0.0224574	-0.032964
18.57	0.969519	0.0145576	-0.056703	0.964741	0.00352224	-0.0810303	0.976701	0.0204286	-0.0366207
18.58	0.969371	0.0149309	-0.0565609	0.96471	0.00275414	-0.0824656	0.976508	0.0181698	-0.0405982
18.59	0.96922	0.0152048	-0.0565767	0.964686	0.00196303	-0.0839242	0.976338	0.0157018	-0.0448613
18.6	0.969067	0.015298	-0.0568735	0.96467	0.00116719	-0.085378	0.976194	0.0130494	-0.0493686
18.61	0.968915	0.0151341	-0.0575656	0.964663	0.000381722	-0.0868036	0.976078	0.0102411	-0.0540736
18.62	0.968766	0.0146451	-0.0587526	0.964663	-0.000381761	-0.0881834	0.97599	0.0073088	-0.0589252
18.63	0.968623	0.0137755	-0.0605149	0.96467	-0.00111531	-0.0895057	0.975932	0.00428717	-0.0638684
18.64	0.968491	0.0124842	-0.0629094	0.964685	-0.00181468	-0.0907643	0.975904	0.00121302	-0.0688455
18.65	0.968375	0.0107475	-0.0659657	0.964706	-0.00247913	-0.0919587	0.975907	-0.00187536	-0.0737971
18.66	0.968278	0.0085605	-0.0696847	0.964734	-0.00311117	-0.0930933	0.975941	-0.00493893	-0.078663
18.67	0.968205	0.00593757	-0.0740374	0.964768	-0.00371609	-0.0941767	0.976006	-0.00793874	-0.0833843
18.68	0.96816	0.00291268	-0.0789649	0.964808	-0.00430143	-0.0952208	0.9761	-0.0108368	-0.0879034
18.69	0.968148	-0.00046166	-0.0843807	0.964854	-0.00487632	-0.09624	0.976222	-0.0135967	-0.0921667
18.7	0.96817	-0.00411595	-0.0901731	0.964905	-0.00545083	-0.0972497	0.976371	-0.016185	-0.0961246
18.71	0.96823	-0.00796615	-0.096209	0.964963	-0.00603524	-0.0982657	0.976545	-0.0185713	-0.0997335
18.72	0.96833	-0.0119167	-0.102339	0.965026	-0.00663935	-0.0993029	0.976741	-0.0207295	-0.102956
18.73	0.968468	-0.0158639	-0.108403	0.965095	-0.00727183	-0.100374	0.976958	-0.0226382	-0.105764
18.74	0.968646	-0.0197003	-0.114237	0.965171	-0.00793963	-0.10149	0.977193	-0.0242813	-0.108136
18.75	0.968862	-0.0233183	-0.119677	0.965254	-0.0086475	-0.102657	0.977443	-0.0256484	-0.11006
18.76	0.969111	-0.0266149	-0.124569	0.965344	-0.00939762	-0.103877	0.977705	-0.026735	-0.111534
18.77	0.969392	-0.0294954	-0.128774	0.965442	-0.0101894	-0.10515	0.977976	-0.0275429	-0.112564
18.78	0.969699	-0.0318776	-0.132172	0.965548	-0.0110193	-0.106469	0.978254	-0.0280797	-0.113167
18.79	0.970028	-0.0336953	-0.134668	0.965662	-0.0118809	-0.107824	0.978537	-0.0283588	-0.113367
18.8	0.970371	-0.0349007	-0.136199	0.965785	-0.0127654	-0.1092	0.978821	-0.0283991	-0.113198
18.81	0.970723	-0.0354671	-0.136734	0.965917	-0.0136615	-0.110581	0.979104	-0.0282244	-0.112698
18.82	0.971078	-0.03539	-0.136275	0.966058	-0.0145561	-0.111945	0.979384	-0.0278624	-0.111915
18.83	0.971429	-0.0346877	-0.13486	0.966208	-0.0154348	-0.113272	0.97966	-0.0273446	-0.110899
18.84	0.97177	-0.0334012	-0.132561	0.966367	-0.0162826	-0.114537	0.979931	-0.0267047	-0.109704
18.85	0.972095	-0.0315924	-0.129483	0.966533	-0.0170847	-0.11572	0.980194	-0.025978	-0.108386
18.86	0.9724	-0.0293428	-0.125758	0.966708	-0.0178268	-0.116798	0.98045	-0.0252001	-0.107
18.87	0.97268	-0.0267502	-0.121543	0.96689	-0.0184962	-0.117754	0.980698	-0.0244061	-0.105603
18.88	0.972934	-0.0239252	-0.117012	0.967077	-0.0190823	-0.118572	0.980938	-0.0236297	-0.104244
18.89	0.973158	-0.0209875	-0.112352	0.967271	-0.0195771	-0.119241	0.98117	-0.0229015	-0.102971
18.9	0.973354	-0.0180612	-0.107755	0.967468	-0.0199759	-0.119755	0.981396	-0.0222492	-0.101826
18.91	0.97352	-0.0152704	-0.103411	0.96767	-0.0202771	-0.120114	0.981615	-0.0216959	-0.100842
18.92	0.97366	-0.0127342	-0.0994995	0.967873	-0.0204832	-0.120323	0.98183	-0.0212597	-0.100046
18.93	0.973776	-0.0105626	-0.0961852	0.968079	-0.0206004	-0.120392	0.982041	-0.0209537	-0.0994556
18.94	0.973872	-0.00885196	-0.0936099	0.968285	-0.0206383	-0.120338	0.982249	-0.0207848	-0.0990803
18.95	0.973954	-0.00768127	-0.0918877	0.968491	-0.0206101	-0.120183	0.982457	-0.0207545	-0.0989196
18.96	0.974028	-0.00710928	-0.0911	0.968697	-0.020532	-0.119951	0.982665	-0.0208584	-0.0989648
18.97	0.974098	-0.0071719	-0.0912926	0.968902	-0.0204226	-0.119673	0.982874	-0.0210866	-0.0991986
18.98	0.974173	-0.00788082	-0.0924736	0.969105	-0.0203022	-0.11938	0.983087	-0.021424	-0.0995961
18.99	0.974258	-0.00922284	-0.0946127	0.969307	-0.0201924	-0.119105	0.983303	-0.0218514	-0.100126
19	0.974359	-0.0111602	-0.0976425	0.969509	-0.0201148	-0.118881	0.983524	-0.0223456	-0.100752
19.01	0.974483	-0.0136319	-0.10146	0.96971	-0.0200903	-0.118739	0.98375	-0.0228807	-0.101432
19.02	0.974633	-0.0165559	-0.105932	0.969911	-0.0201384	-0.118709	0.983981	-0.023429	-0.102125
19.03	0.974815	-0.019832	-0.110898	0.970113	-0.0202763	-0.118816	0.984218	-0.0239621	-0.102786
19.04	0.97503	-0.0233455	-0.116177	0.970316	-0.0205181	-0.11908	0.98446	-0.0244515	-0.103372
19.05	0.975282	-0.0269715	-0.121574	0.970523	-0.0208741	-0.119514	0.984707	-0.0248703	-0.103842
19.06	0.97557	-0.0305798	-0.126887	0.970734	-0.0213503	-0.120128	0.984957	-0.0251938	-0.104159
19.07	0.975893	-0.0340393	-0.131918	0.97095	-0.0219481	-0.12092	0.98521	-0.0254005	-0.104293
19.08	0.976249	-0.0372234	-0.136473	0.971173	-0.0226639	-0.121883	0.985464	-0.0254727	-0.104218
19.09	0.976636	-0.0400145	-0.140378	0.971404	-0.0234892	-0.123003	0.985719	-0.0253974	-0.103916
19.1	0.977048	-0.0423086	-0.143478	0.971643	-0.0244107	-0.124258	0.985971	-0.0251669	-0.103378
19.11	0.97748	-0.0440193	-0.145651	0.971892	-0.0254106	-0.125618	0.986221	-0.0247787	-0.102601
19.12	0.977926	-0.0450811	-0.146803	0.972151	-0.026467	-0.12705	0.986466	-0.0242357	-0.101594
19.13	0.978379	-0.0454518	-0.146881	0.972421	-0.0275548	-0.128513	0.986705	-0.0235465	-0.100371
19.14	0.978832	-0.0451146	-0.14587	0.972702	-0.028646	-0.129965	0.986937	-0.0227245	-0.0989557
19.15	0.979279	-0.0440782	-0.143794	0.972994	-0.0297112	-0.13136	0.987159	-0.021788	-0.0973776
19.16	0.979711	-0.0423771	-0.140716	0.973296	-0.0307203	-0.132653	0.987372	-0.0207591	-0.0956727
19.17	0.980124	-0.0400698	-0.136737	0.973608	-0.0316432	-0.133798	0.987574	-0.0196633	-0.0938811
19.18	0.980511	-0.0372374	-0.13199	0.973928	-0.0324515	-0.134754	0.987765	-0.0185282	-0.0920463
19.19	0.980867	-0.03398	-0.126635	0.974256	-0.0331189	-0.135481	0.987944	-0.017383	-0.0902134
19.2	0.981189	-0.0304129	-0.120857	0.97459	-0.0336223	-0.135947	0.988112	-0.0162568	-0.0884274
19.21	0.981475	-0.0266628	-0.114854	0.974928	-0.033943	-0.136126	0.988269	-0.0151783	-0.0867316
19.22	0.981722	-0.0228626	-0.108832	0.975268	-0.0340669	-0.135998	0.988416	-0.0141741	-0.0851664
19.23	0.981932	-0.0191466	-0.102997	0.975608	-0.0339851	-0.135554	0.988553	-0.0132683	-0.0837671
19.24	0.982106	-0.0156452	-0.0975482	0.975947	-0.0336948	-0.134792	0.988682	-0.0124812	-0.0825636
19.25	0.982246	-0.0124804	-0.0926687	0.976281	-0.0331988	-0.133719	0.988803	-0.0118289	-0.0815785
19.26	0.982356	-0.00976063	-0.0885193	0.97661	-0.0325059	-0.132353	0.988918	-0.0113223	-0.0808265
19.27	0.982443	-0.00757712	-0.0852327	0.976931	-0.0316307	-0.130718	0.98903	-0.0109673	-0.0803143
19.28	0.98251	-0.00600018	-0.0829083	0.977242	-0.0305927	-0.128847	0.989138	-0.0107638	-0.0800397
19.29	0.982565	-0.00507667	-0.0816084	0.977542	-0.0294163	-0.126781	0.989245	-0.0107066	-0.079992
19.3	0.982613	-0.00482818	-0.0813561	0.97783	-0.0281296	-0.124564	0.989352	-0.0107849	-0.0801524
19.31	0.982663	-0.00525028	-0.0821341	0.978104	-0.0267639	-0.122246	0.989461	-0.0109826	-0.0804947
19.32	0.98272	-0.00631269	-0.0838857	0.978365	-0.0253521	-0.119878	0.989572	-0.0112797	-0.0809859
19.33	0.982791	-0.00796045	-0.0865169	0.978611	-0.0239283	-0.117514	0.989687	-0.0116521	-0.0815877
19.34	0.982881	-0.0101161	-0.0899001	0.978843	-0.022526	-0.115205	0.989805	-0.0120729	-0.0822579
19.35	0.982995	-0.0126825	-0.0938788	0.979061	-0.0211775	-0.112999	0.989928	-0.0125132	-0.0829515
19.36	0.983135	-0.0155469	-0.098274	0.979267	-0.0199126	-0.110943	0.990055	-0.0129435	-0.0836228
19.37	0.983306	-0.018585	-0.102891	0.97946	-0.0187576	-0.109074	0.990187	-0.0133341	-0.0842269
19.38	0.983507	-0.0216656	-0.107526	0.979642	-0.0177344	-0.107424	0.990322	-0.0136568	-0.0847208
19.39	0.983739	-0.0246559	-0.111975	0.979815	-0.0168598	-0.106018	0.990459	-0.0138854	-0.0850659
19.4	0.983999	-0.0274267	-0.116042	0.97998	-0.016145	-0.10487	0.990599	-0.0139973	-0.0852286
19.41	0.984286	-0.0298568	-0.119545	0.980138	-0.0155949	-0.103985	0.990739	-0.0139733	-0.0851816
19.42	0.984595	-0.031838	-0.122323	0.980292	-0.0152084	-0.103359	0.990877	-0.0137993	-0.0849054
19.43	0.984921	-0.0332793	-0.124244	0.980442	-0.0149779	-0.102978	0.991014	-0.0134663	-0.0843884
19.44	0.985258	-0.03411	-0.125208	0.980592	-0.0148898	-0.102818	0.991146	-0.0129706	-0.0836276
19.45	0.985601	-0.0342824	-0.125152	0.98074	-0.014925	-0.102848	0.991272	-0.0123145	-0.0826287
19.46	0.985941	-0.0337738	-0.12405	0.98089	-0.0150594	-0.103029	0.991392	-0.0115054	-0.0814058
19.47	0.986274	-0.0325871	-0.121918	0.981042	-0.0152644	-0.103317	0.991502	-0.0105563	-0.0799811
19.48	0.986591	-0.0307503	-0.11881	0.981195	-0.0155084	-0.103661	0.991602	-0.00948492	-0.0783838
19.49	0.986886	-0.0283157	-0.114814	0.981352	-0.0157573	-0.104009	0.991691	-0.0083131	-0.0766492
19.5	0.987155	-0.0253575	-0.110055	0.98151	-0.0159757	-0.104306	0.991768	-0.00706613	-0.0748177
19.51	0.987392	-0.0219688	-0.104682	0.981671	-0.0161284	-0.104499	0.991832	-0.00577173	-0.0729328
19.52	0.987593	-0.0182579	-0.0988688	0.981832	-0.016181	-0.104536	0.991883	-0.00445914	-0.07104
19.53	0.987756	-0.0143436	-0.0928012	0.981994	-0.016101	-0.10437	0.991921	-0.00315798	-0.0691849
19.54	0.98788	-0.0103512	-0.0866743	0.982154	-0.0158595	-0.103958	0.991946	-0.00189725	-0.0674118
19.55	0.987963	-0.00640657	-0.0806822	0.98231	-0.0154312	-0.103263	0.991959	-0.000704266	-0.0657618
19.56	0.988008	-0.00263173	-0.0750108	0.982461	-0.0147957	-0.102258	0.99196	0.000396362	-0.0642716
19.57	0.988017	0.000860258	-0.0698306	0.982605	-0.0139382	-0.100923	0.991951	0.00138358	-0.0629719
19.58	0.987992	0.00396981	-0.0652896	0.982739	-0.0128495	-0.0992466	0.991933	0.00224069	-0.0618866
19.59	0.987938	0.0066148	-0.0615077	0.982861	-0.0115266	-0.0972289	0.991907	0.00295594	-0.0610317
19.6	0.987861	0.00873382	-0.0585718	0.982969	-0.00997282	-0.0948781	0.991874	0.00352298	-0.0604146
19.61	0.987766	0.0102887	-0.056532	0.98306	-0.00819735	-0.0922118	0.991837	0.00394112	-0.0600342
19.62	0.987657	0.0112661	-0.0554001	0.983132	-0.00621524	-0.0892566	0.991796	0.00421537	-0.0598805
19.63	0.987542	0.0116779	-0.0551491	0.983183	-0.00404683	-0.0860467	0.991753	0.0043563	-0.0599351
19.64	0.987425	0.0115609	-0.0557138	0.983212	-0.0017171	-0.0826232	0.991709	0.00437969	-0.0601717
19.65	0.987312	0.0109752	-0.056994	0.983217	0.000745005	-0.079033	0.991665	0.00430601	-0.0605572
19.66	0.987207	0.0100021	-0.0588581	0.983197	0.00330748	-0.0753271	0.991623	0.00415975	-0.0610527
19.67	0.987113	0.00874052	-0.0611488	0.98315	0.00593615	-0.0715593	0.991582	0.00396855	-0.0616147
19.68	0.987032	0.00730295	-0.0636893	0.983078	0.00859563	-0.0677849	0.991543	0.0037623	-0.0621968
19.69	0.986967	0.00581121	-0.0662904	0.982978	0.0112503	-0.0640588	0.991506	0.0035721	-0.062751
19.7	0.986916	0.0043912	-0.0687586	0.982852	0.0138651	-0.0604345	0.991471	0.00342922	-0.0632299
19.71	0.986878	0.00316783	-0.0709038	0.982701	0.0164067	-0.0569626	0.991437	0.00336399	-0.0635877
19.72	0.986851	0.00225979	-0.0725474	0.982525	0.0188441	-0.0536893	0.991404	0.00340481	-0.0637821
19.73	0.986831	0.00177455	-0.0735296	0.982324	0.0211493	-0.050656	0.991369	0.00357714	-0.0637758
19.74	0.986814	0.00180385	-0.0737166	0.982102	0.023298	-0.0478976	0.991331	0.00390264	-0.0635376
19.75	0.986793	0.00241961	-0.0730063	0.981859	0.0252701	-0.0454428	0.99129	0.0043984	-0.0630438
19.76	0.986763	0.00367071	-0.0713328	0.981597	0.0270497	-0.0433129	0.991242	0.00507635	-0.0622787
19.77	0.986717	0.00558062	-0.0686701	0.981318	0.0286257	-0.0415222	0.991187	0.00594285	-0.0612354
19.78	0.986649	0.00814595	-0.0650335	0.981025	0.0299913	-0.0400776	0.991123	0.00699837	-0.0599161
19.79	0.986552	0.0113361	-0.0604799	0.980719	0.0311446	-0.0389792	0.991047	0.0082375	-0.058332
19.8	0.98642	0.0150941	-0.0551063	0.980402	0.0320874	-0.0382206	0.990957	0.00964903	-0.0565031
19.81	0.986248	0.019338	-0.0490468	0.980078	0.0328259	-0.0377894	0.990853	0.0112162	-0.0544576
19.82	0.986032	0.023964	-0.0424678	0.979746	0.0333692	-0.0376682	0.990732	0.0129175	-0.0522311
19.83	0.985768	0.0288497	-0.0355626	0.979411	0.0337297	-0.0378353	0.990594	0.0147266	-0.0498657
19.84	0.985454	0.0338588	-0.0285439	0.979072	0.0339219	-0.0382655	0.990437	0.0166139	-0.0474084
19.85	0.985091	0.0388459	-0.0216362	0.978733	0.033962	-0.0389314	0.990261	0.0185469	-0.0449102
19.86	0.984678	0.0436616	-0.0150676	0.978393	0.0338676	-0.0398039	0.990066	0.0204914	-0.0424243
19.87	0.984218	0.0481586	-0.00906126	0.978055	0.0336566	-0.0408534	0.989852	0.022412	-0.0400048
19.88	0.983716	0.0521968	-0.00382651	0.97772	0.0333469	-0.0420506	0.989618	0.0242738	-0.037705
19.89	0.983176	0.055649	0.000448757	0.977389	0.032956	-0.0433673	0.989366	0.0260428	-0.0355759
19.9	0.982605	0.0584052	0.00360556	0.977061	0.0325006	-0.0447768	0.989097	0.027687	-0.0336652
19.91	0.98201	0.0603777	0.00552008	0.976738	0.0319961	-0.0462545	0.988813	0.0291771	-0.0320157
19.92	0.9814	0.0615038	0.0061087	0.976421	0.0314561	-0.0477786	0.988514	0.0304875	-0.0306642
19.93	0.980783	0.0617491	0.00533145	0.976109	0.0308931	-0.0493298	0.988203	0.0315966	-0.029641
19.94	0.980168	0.0611082	0.003194	0.975803	0.0303173	-0.0508917	0.987883	0.0324874	-0.0289689
19.95	0.979564	0.0596059	-0.000252171	0.975503	0.0297377	-0.0524507	0.987554	0.033148	-0.0286632
19.96	0.978978	0.057296	-0.00491129	0.975208	0.0291612	-0.0539959	0.98722	0.0335712	-0.0287309
[truncated: 3,016 more rows]
